# Supplementary material for: Rhodium-catalyzed synthesis of esters from aryl iodides and alcohols: use of alcohols with/without the assistance of aldehydes as carbon monoxide and nucleophile sources
Source: Royal Society of Chemistry journal article supplement (doi:10.1039/c6ra25723b), 2016-12-23

## Supporting Information

### Rhodium-Catalyzed Synthesis of Esters from Aryl Iodides and Alcohols: Use of Alcohols with/without the Assistance of Aldehydes as Carbon Monoxide and Nucleophile Sources

Ju Hyun Kim, Hawon Park and Young Keun Chung\*

*Department of Chemistry, College of Natural Sciences, Seoul National University, Seoul 151-747, Korea*

#### I. General Information

**Chemicals and Reagents** All solvents were dried and distilled according to standard methods before use. Solvents utilized in this work were obtained from Sigma-Aldrich and Samchun Pure Chemicals (hexanes, ethyl acetate, diethyl ether, dichloromethane, and acetone). Toluene were dried over Na and distilled under nitrogen. *n*-Hexane, diethyl ether, and ethyl acetate were used without further purification. Reagents were purchased from Sigma-Aldrich, Alfa Aesar, or TCI and were used as received.  $[\text{Rh}(\text{COD})\text{Cl}]_2$  were purchased from Pressure Chem. DPEPhos((oxybis(2,1-phenylene))bis(diphenylphosphane)) were purchased from Alfa Aesar. Reactions were monitored by thin-layer chromatography on 0.25 mm E. Merck silica gel plates (60F-254). The TLC plates were visualized by UV-light (254 nm) and treatment with acidic *p*-anisaldehyde and  $\text{KMnO}_4$  stain followed by gentle heating. Workup procedures were done in air. Flash column chromatography was carried out on Merck 60 silica gel (230 – 400 mesh).

**Physical Methods**  $^1\text{H}$  and  $^{13}\text{C}$  NMR spectra were recorded with Agilent 400-MR DD2 (400 MHz and 100 MHz, respectively) spectrometer.  $^1\text{H}$  NMR spectra were taken in  $\text{CDCl}_3$  and were referenced to residual TMS (7.26 ppm) and reported as follows: chemical shift, multiplicity (s = singlet, d = doublet, t = triplet, dd = doublet of doublet, m = multiplet). Chemical shifts of the  $^{13}\text{C}$  NMR spectra were measured relative to  $\text{CDCl}_3$  (77.00 ppm). High-Resolution Mass Spectra were obtained at the Korea Basic Science Institute (Daegu, South Korea) on a Jeol JMS 700 high resolution mass spectrometer. GC-MS analyses were performed with a HP-6890 series with a HP-5 capillary column (30 m x 0.25 mm; coating thickness 0.25  $\mu\text{m}$ ) and Agilent 5973 Network Mass Selective detector. Analytical condition – initial temperature: 50  $^\circ\text{C}$ , raising temperature 10  $^\circ\text{C}$  / min, final temperature : 280  $^\circ\text{C}$ , He gas, Pressure : 7.56 psi, Total flow : 53.7 mL / min.

#### II. General Procedure for the entries reported Table 1 from aryl iodide and alcohol

Reactions were performed in a schlenk tube equipped with a stirring bar and capped with a rubber septum. The followings were placed in the tube in order: 5 mg (c.a. 2 mol%) of catalyst, 10 mg of ligand (4 mol%) 0.5 mmol of aryl iodide, 1 equiv (86  $\mu\text{L}$ ) of base, 3 equiv of 1-octanol and 1.5 mL of toluene. The mixture was stirred at 120  $^\circ\text{C}$  for 18 h. The reaction mixture was extracted with aqueous  $\text{NH}_4\text{Cl}$  solution and diethyl ether and dried

over anhydrous  $\text{MgSO}_4$ , filtered, and finally evaporated under reduced pressure. The concentrated reaction mixture was purified by flash chromatography on silica gel (*n*-hexane/ethyl acetate) to afford the product.

**Table S1.** Screening reaction conditions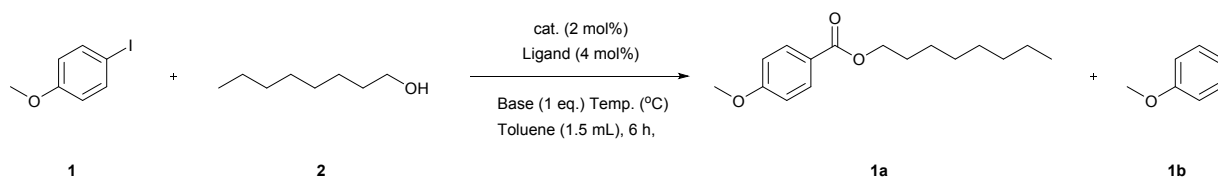

| entry | cat (mol %)              | Ligand           | Base              | Temperature | Yield (%) <sup>a,b</sup> |
|-------|--------------------------|------------------|-------------------|-------------|--------------------------|
| 1     | Rh(COD)Cl <sub>2</sub>   | DPEPhos          | TMP               | 120         | 50 (45)                  |
| 2     | RhCl <sub>3</sub>        | DPEPhos          | TMP               | 120         | 40 (40)                  |
| 3     | Rh(OAc) <sub>2</sub>     | DPEPhos          | TMP               | 120         | 42 (50)                  |
| 4     | Rh(IMes)(COD)Cl          | DPEPhos          | TMP               | 120         | 25 (60)                  |
| 5     | Ir(COD)Cl <sub>2</sub>   | DPEPhos          | TMP               | 120         | N.R.                     |
| 6     | Pd(OAc) <sub>2</sub>     | DPEPhos          | TMP               | 120         | (4) <sup>c</sup>         |
| 7     | NiCl <sub>2</sub>        | DPEPhos          | TMP               | 120         | N.R.                     |
| 8     | PtCl <sub>2</sub>        | DPEPhos          | TMP               | 120         | N.R.                     |
| 9     | [Rh(COD)Cl] <sub>2</sub> | PPh <sub>3</sub> | TMP               | 120         | 8 (75)                   |
| 10    | [Rh(COD)Cl] <sub>2</sub> | dppm             | TMP               | 120         | trace (80)               |
| 11    | [Rh(COD)Cl] <sub>2</sub> | dppe             | TMP               | 120         | 4 (95)                   |
| 12    | [Rh(COD)Cl] <sub>2</sub> | dppp             | TMP               | 120         | 32 (57)                  |
| 13    | [Rh(COD)Cl] <sub>2</sub> | dppb             | TMP               | 120         | 22 (60)                  |
| 14    | [Rh(COD)Cl] <sub>2</sub> | dppf             | TMP               | 120         | 29 (34)                  |
| 15    | [Rh(COD)Cl] <sub>2</sub> | dtbpy            | TMP               | 120         | N.R.                     |
| 16    | [Rh(COD)Cl] <sub>2</sub> | DCyOs            | TMP               | 120         | N.R.                     |
| 17    | [Rh(COD)Cl] <sub>2</sub> | Xantphos         | TMP               | 120         | 13 (51)                  |
| 18    | [Rh(COD)Cl] <sub>2</sub> | DPEphos          | DIPEA             | 120         | 3 (77)                   |
| 19    | [Rh(COD)Cl] <sub>2</sub> | DPEPhos          | Dicyclohexylamine | 120         | 5 (82)                   |
| 20    | [Rh(COD)Cl] <sub>2</sub> | DPEPhos          | DABCO             | 120         | 18 (70)                  |
| 21    | [Rh(COD)Cl] <sub>2</sub> | DPEPhos          | PMP               | 120         | 26 (58)                  |
| 22    | [Rh(COD)Cl] <sub>2</sub> | DPEPhos          | TBD               | 120         | (62)                     |

|    |                          |         |        |     |        |
|----|--------------------------|---------|--------|-----|--------|
| 23 | [Rh(COD)Cl] <sub>2</sub> | DPEPhos | NaOtBu | 120 | (99)   |
| 24 | [Rh(COD)Cl] <sub>2</sub> | DPEPhos | TMP    | 70  | trace  |
| 25 | [Rh(COD)Cl] <sub>2</sub> | DPEPhos | TMP    | 100 | 6 (19) |

<sup>a</sup> GC yield with 1,3,5-trimethyl as an internal standard <sup>b</sup> Yield of anisole are in parenthesis <sup>c</sup> decomposed product was obtained.

**Table S2.** Screening additives

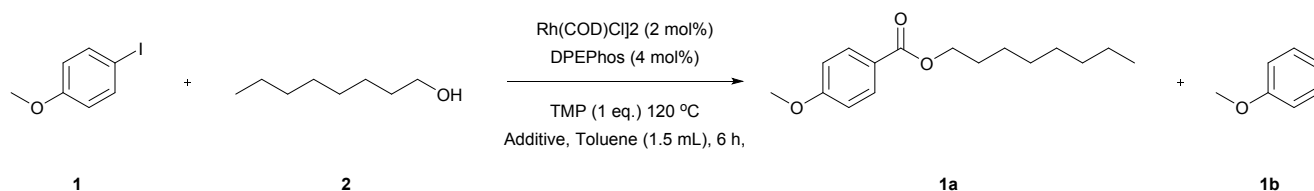

| entry | Additive               | 1a <sup>a</sup> | 1b <sup>a</sup> | 1 <sup>a</sup> |
|-------|------------------------|-----------------|-----------------|----------------|
| 1     | p-Benzoquinone         | trace           |                 |                |
| 2     | 1-dodecene             | 48              | 44              |                |
| 3     | nitrosobenzene         |                 |                 | 78             |
| 4     | pinacolone             | 18              | 70              |                |
| 5     | triphenylsilane        |                 | 60              |                |
| 6     | Cu(OAc) <sub>2</sub>   |                 | 99              |                |
| 7     | Oxone                  |                 |                 | 57             |
| 8     | TEMPO                  | trace           | 58              |                |
| 9     | BHT <sup>b</sup>       | 32              | 58              |                |
| 10    | hydroquinone           | trace           | 61              |                |
| 11    | O <sub>2</sub> (1 atm) |                 | 80              |                |
| 12    | Mn(0) powder           | 10              | 90              |                |

<sup>a</sup> GC yield with 1,3,5-trimethyl as an internal standard <sup>b</sup> 2,6-Di-*tert*-butyl-4-methylphenol

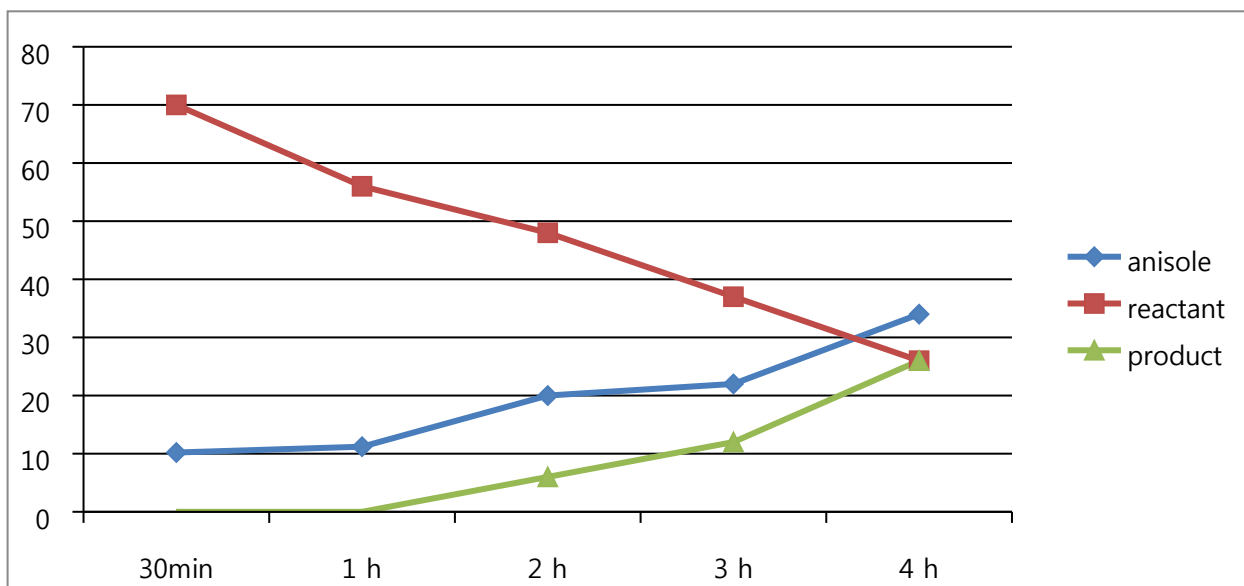

**Figure S1. Time-Scale experiment**

***III. General Procedure for the entries reported Table 3 from aryl iodide and alcohol with aldehyde***

Reactions were performed in a schlenk tube equipped with a stirring bar and capped with a rubber septum. The followings were placed in the tube in order: 5 mg (c.a. 2 mol%) of catalyst, 10 mg of ligand (4 mol%) 0.5 mmol of aryl iodide, 1 equiv (86  $\mu$ L) of base, 1equiv. of aldehyde, 3 equiv of 1-octanol and 1.5 mL of toluene. The mixture was stirred at 130  $^{\circ}$ C for 18 h. The reaction mixture was extracted with aqueous  $\text{NH}_4\text{Cl}$  solution and diethyl ether and dried over anhydrous  $\text{MgSO}_4$ , filtered, and finally evaporated under reduced pressure. The concentrated reaction mixture was purified by flash chromatography on silica gel (*n*-hexane/ethyl acetate) to afford the product.

**Table S3. Screening reaction conditions with aldehyde**

| entry | 1-octanol | cat                             | R | ligand           | Rh(COD)Cl <sub>2</sub> (2 mol%)<br>DPEPhos (4 mol%) | Base                           | Temperature | Yield (%) <sup>a,b</sup> |           |
|-------|-----------|---------------------------------|---|------------------|-----------------------------------------------------|--------------------------------|-------------|--------------------------|-----------|
| 1     |           | Rh(COD)Cl <sub>2</sub>          |   | DPEPhos          | TMP (1 eq.)<br>Toluene (1.5 mL), 6 h,               | TMP                            | 120         | 90 (10)                  | <b>1a</b> |
| 2     |           | RhCl <sub>3</sub>               |   | DPEPhos          | Me                                                  | TMP                            | 120         | 7 (2)                    | <b>1b</b> |
| 3     |           | Rh(OAc) <sub>2</sub>            |   | DPEPhos          | Me                                                  | TMP                            | 120         | 75 (17)                  |           |
| 4     |           | Rh(COD)Cl <sub>2</sub> (4 mol%) |   | DPEPhos          | Me                                                  | TMP                            | 120         | 51 (18)                  |           |
| 5     |           | Ir(COD)Cl <sub>2</sub>          |   | DPEPhos          | TMP                                                 | TMP                            | 120         | N.R.                     |           |
| 6     |           | Pd(OAc) <sub>2</sub>            |   | DPEPhos          | TMP                                                 | TMP                            | 120         | (4) <sup>c</sup>         |           |
| 7     |           | NiCl <sub>2</sub>               |   | DPEPhos          | TMP                                                 | TMP                            | 120         | N.R.                     |           |
| 8     |           | Rh(COD)Cl <sub>2</sub>          |   | PPh <sub>3</sub> | Me                                                  | TMP                            | 120         | 7 (46)                   |           |
| 9     |           | [Rh(COD)Cl] <sub>2</sub>        |   | dppm             | Me                                                  | TMP                            | 120         | trace (67)               |           |
| 10    |           | [Rh(COD)Cl] <sub>2</sub>        |   | dppe             | Me                                                  | TMP                            | 120         | 3 (54)                   |           |
| 11    |           | [Rh(COD)Cl] <sub>2</sub>        |   | dppp             | Me                                                  | TMP                            | 120         | 52 (43)                  |           |
| 12    |           | [Rh(COD)Cl] <sub>2</sub>        |   | dppb             | Me                                                  | TMP                            | 120         | 58 (39)                  |           |
| 13    |           | [Rh(COD)Cl] <sub>2</sub>        |   | dpppent          | Me                                                  | TMP                            | 120         | 49 (31)                  |           |
| 14    |           | Rh(COD)Cl <sub>2</sub>          |   | dppbenz          | Me                                                  | TMP                            | 120         | trace (48)               |           |
| 15    |           | Rh(COD)Cl <sub>2</sub>          |   | BINAP            | Me                                                  | TMP                            | 120         | 52 (13)                  |           |
| 16    |           | Rh(COD)Cl <sub>2</sub>          |   | DPEPhos          | Cl                                                  | TMP                            | 120         | 75 (5)                   |           |
| 17    |           | Rh(COD)Cl <sub>2</sub>          |   | DPEPhos          | Br                                                  | TMP                            | 120         | 45 (12)                  |           |
| 18    |           | Rh(COD)Cl <sub>2</sub>          |   | DPEPhos          | NO <sub>2</sub>                                     | TMP                            | 120         | 70 (4)                   |           |
| 19    |           | Rh(COD)Cl <sub>2</sub>          |   | DPEPhos          | dodecyl aldehyde                                    | TMP                            | 120         | 73 (19)                  |           |
| 20    |           | Rh(COD)Cl <sub>2</sub>          |   | DPEPhos          | propionaldehyde                                     | TMP                            | 120         | 2 (24)                   |           |
| 21    |           | Rh(COD)Cl <sub>2</sub>          |   | DPEPhos          | Me                                                  | DIPEA                          | 120         | 27 (56)                  |           |
| 22    |           | Rh(COD)Cl <sub>2</sub>          |   | DPEPhos          | Me                                                  | DABCO                          | 120         | 10 (32)                  |           |
| 23    |           | Rh(COD)Cl <sub>2</sub>          |   | DPEPhos          | Me                                                  | K <sub>2</sub> CO <sub>3</sub> | 120         | 37 (2)                   |           |
| 24    |           | Rh(COD)Cl <sub>2</sub>          |   | DPEPhos          | Me                                                  | DIPEA                          | 110         | 52 (9)                   |           |

<sup>a</sup> GC yield using 1,3,5-trimethylbenzene as an internal standard. <sup>b</sup> Reduction product yield are in parenthesis. <sup>c</sup> Decomposed product were observed

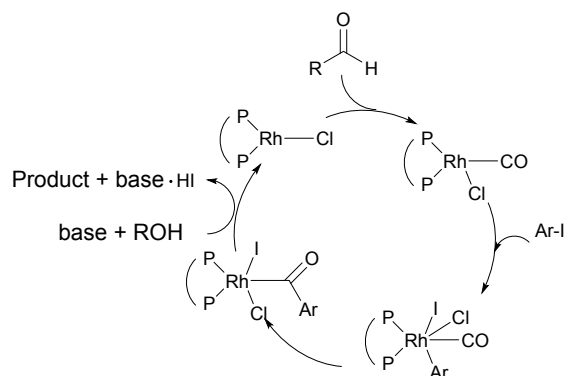

**Scheme S1. Proposed mechanism with aldehyde.**

**Table S4. Control Experiment for proposed mechanism**

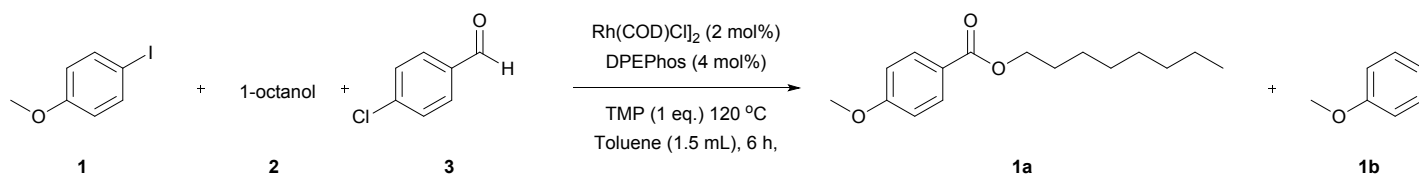

| entry | Variation from initial conditions | Yield <sup>b</sup> |
|-------|-----------------------------------|--------------------|
| 1     | Without [Rh(COD)Cl] <sub>2</sub>  | trace              |
| 2     | Without alcohol                   | No Reaction        |
| 3     | Without Ligand                    | No Reaction        |
| 4     | Without Aldehyde                  | 44                 |
| 5     | Without Base                      | No Reaction        |

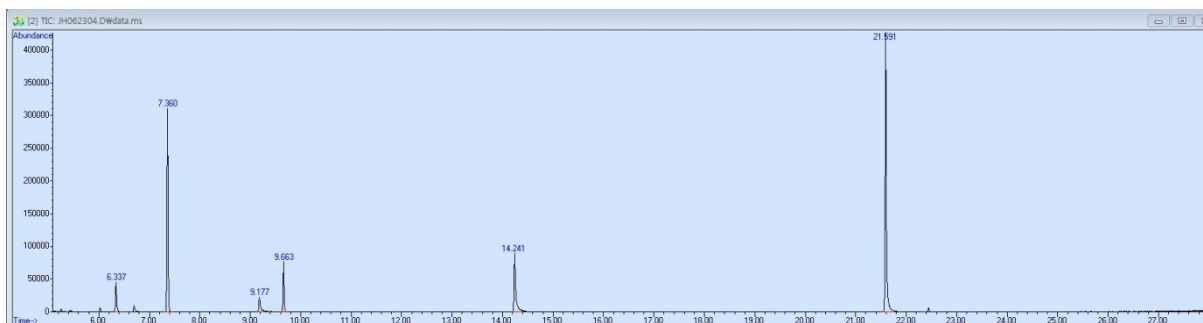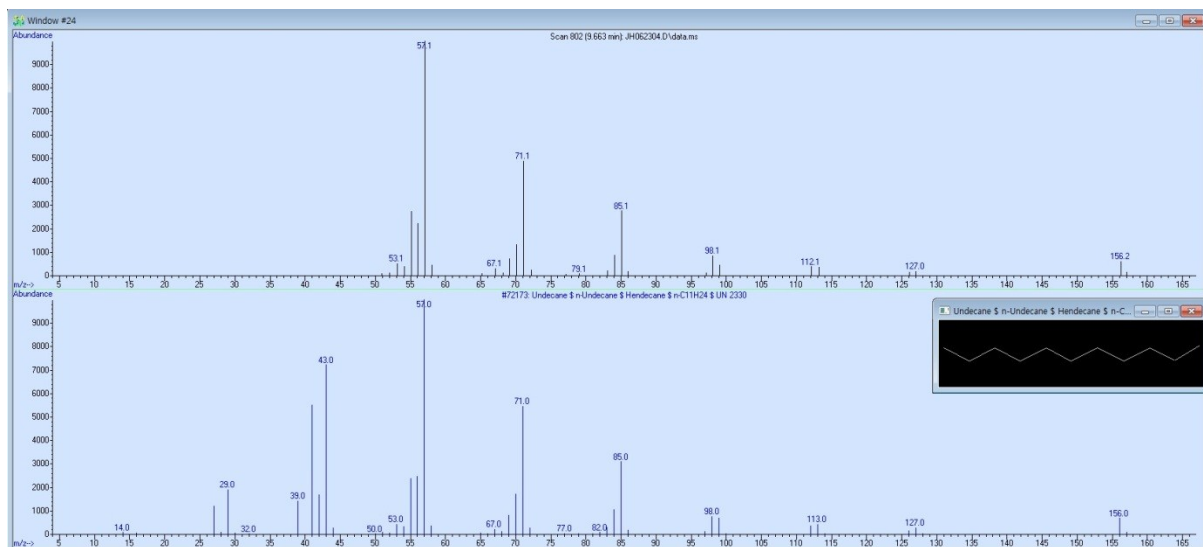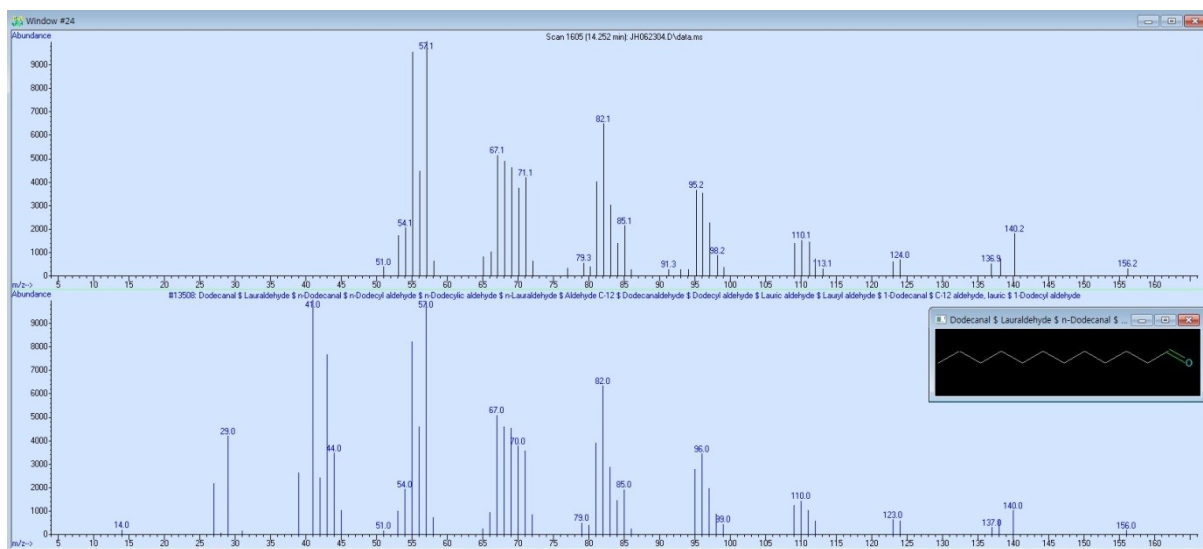

**Figure S2. GC data using dodecyl aldehyde as a CO source**

Retention time – 9.663 min : undecane (R-H moiety)

14.241 min : dodecyl aldehyde (CO surrogate)

21.591 min : product

### Characterization Data for the Isolated Products



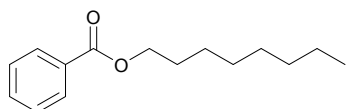

**Octyl benzoate:** colorless liquid (Table 3, **4ba**)

$^1\text{H NMR}$  (400 MHz,  $\text{CDCl}_3$ )  $\delta$  7.97 (d,  $J = 7.3$  Hz, 2 H), 7.47 (t,  $J = 7.4$  Hz, 1 H), 7.36 (t,  $J = 7.7$  Hz, 2 H), 4.24 (t,  $J = 6.7$  Hz, 2 H), 1.83 – 1.59 (m, 2 H), 1.57 – 1.32 (m, 2 H), 1.24 (m, 8 H), 0.81 (t,  $J = 6.6$  Hz, 3 H).

$^{13}\text{C NMR}$  (100 MHz,  $\text{CDCl}_3$ )  $\delta$  166.7, 132.7, 130.5, 129.5, 128.3, 65.1, 31.7, 29.2, 29.1, 28.7, 26.0, 22.6, 14.1.

IR (ATR):  $1723\text{ cm}^{-1}$ , HRMS (EI) calc. for  $[\text{C}_{15}\text{H}_{22}\text{O}_2, \text{M}]^+$  234.1620, found 234.1620

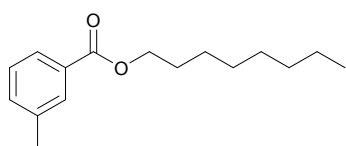

**Octyl 3-methylbenzoate:** colorless liquid (Table 3, **4ca**)

$^1\text{H NMR}$  (400 MHz,  $\text{CDCl}_3$ )  $\delta$  7.77 (d,  $J = 8.7$  Hz, 2 H), 7.25 (m, 2 H), 4.23 (t,  $J = 6.7$  Hz, 2 H), 2.32 (s, 3 H), 1.72 – 1.65 (m, 2 H), 1.40 – 1.33 (m, 2 H), 1.28 – 1.19 (m, 8 H), 0.81 (t,  $J = 6.5$  Hz, 3 H).

$^{13}\text{C NMR}$  (100 MHz,  $\text{CDCl}_3$ )  $\delta$  166.8, 138.0, 133.5, 130.4, 130.0, 128.2, 126.6, 65.1, 31.8, 29.22, 29.16, 28.7, 26.0, 22.6, 21.2, 14.1.

IR (ATR):  $1721\text{ cm}^{-1}$ , HRMS (EI) calc. for  $[\text{C}_{16}\text{H}_{24}\text{O}_2, \text{M}]^+$  248.1776, found 248.1777

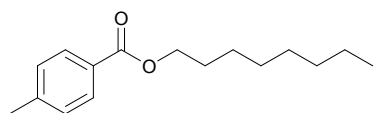

**Octyl 4-methylbenzoate:** colorless liquid (Table 3, **4da**)

$^1\text{H NMR}$  (400 MHz,  $\text{CDCl}_3$ )  $\delta$  7.85 (d,  $J = 8.1$  Hz, 2 H), 7.15 (d,  $J = 8.0$  Hz, 2 H), 4.22 (t,  $J = 6.7$  Hz, 2 H), 2.33 (s, 3 H), 1.72 – 1.63 (m, 2 H), 1.41 – 1.32 (m, 2 H), 1.24 (m, 8 H), 0.81 (t,  $J = 6.7$  Hz, 3 H).

$^{13}\text{C NMR}$  (100 MHz,  $\text{CDCl}_3$ )  $\delta$  166.7, 143.4, 129.5, 129.0, 127.8, 64.9, 31.8, 29.23, 29.17, 28.7, 26.0, 22.6, 21.6, 14.1.

IR (ATR):  $1721\text{ cm}^{-1}$ , HRMS (EI) calc. for  $[\text{C}_{16}\text{H}_{24}\text{O}_2, \text{M}]^+$  248.1776, found 248.1777

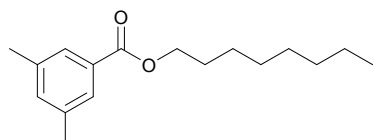

**Octyl 3,5-dimethylbenzoate:** colorless liquid. (Table 3, **4ea**)

$^1\text{H NMR}$  (400 MHz,  $\text{CDCl}_3$ )  $\delta$  7.57 (s, 2 H), 7.09 (s, 1 H), 4.21 (t,  $J = 6.7$  Hz, 2 H), 2.27 (s, 6 H), 1.71 – 1.65 (m, 2 H), 1.39 – 1.32 (m, 2 H), 1.27 – 1.16 (m, 8 H), 0.80 (t,  $J = 6.4$  Hz, 3 H).

$^{13}\text{C NMR}$  (100 MHz,  $\text{CDCl}_3$ )  $\delta$  167.0, 137.9, 134.4, 130.4, 127.2, 65.0, 31.8, 29.23, 29.16, 28.7, 26.0, 22.6, 21.1, 14.1.

IR (ATR):  $1719\text{ cm}^{-1}$ , HRMS (EI) calc. for  $[\text{C}_{17}\text{H}_{26}\text{O}_2, \text{M}]^+$  262.1933, found 262.1933

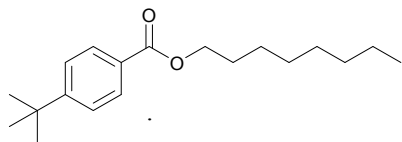

**Octyl 4-(tert-butyl)benzoate:** colorless liquid. (Table3, **4fa**)

$^1\text{H NMR}$  (400 MHz,  $\text{CDCl}_3$ )  $\delta$  7.90 (d,  $J = 8.4$  Hz, 2 H), 7.37 (d,  $J = 8.4$  Hz, 2 H), 4.22 (t,  $J = 6.6$  Hz, 2 H), 1.68 (dd,  $J = 14.2, 7.1$  Hz, 2 H), 1.39 – 1.32 (m, 2 H), 1.26 (s, 9 H), 1.29 – 1.22 (m, 8 H), 0.81 (t,  $J = 6.6$  Hz, 3 H).

$^{13}\text{C NMR}$  (100 MHz,  $\text{CDCl}_3$ )  $\delta$  166.7, 156.4, 129.4, 127.7, 125.2, 64.9, 35.0, 31.8, 31.1, 29.23, 29.18, 28.7, 26.0, 22.6, 14.1.

IR (ATR):  $1721\text{ cm}^{-1}$ , HRMS (EI) calc. for  $[\text{C}_{19}\text{H}_{30}\text{O}_2, \text{M}]^+$  290.2246, found 290.2246

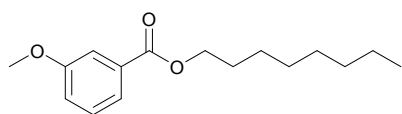

**Octyl 3-methoxybenzoate:** colorless liquid. (Table3, **4ga**)

$^1\text{H NMR}$  (400 MHz,  $\text{CDCl}_3$ )  $\delta$  7.56 (d,  $J = 8.3$  Hz, 1 H), 7.49 (s, 1 H), 7.26 (t,  $J = 8.4$  Hz, 1 H), 7.01 (d,  $J = 8.2$  Hz, 1 H), 4.23 (t,  $J = 7.3$  Hz, 2 H), 3.77 (s, 3 H), 1.72 – 1.65 (m, 2 H), 1.35 (m, 2 H), 1.22 (m, 8 H), 0.80 (t,  $J = 5.0$  Hz, 3 H).

$^{13}\text{C NMR}$  (100 MHz,  $\text{CDCl}_3$ )  $\delta$  166.5, 159.5, 131.8, 129.4, 121.9, 119.2, 114.0, 65.2, 55.4, 31.8, 29.21, 29.16, 28.7, 26.0, 22.6, 14.1.

IR (ATR):  $1700\text{ cm}^{-1}$ , HRMS (EI) calc. for  $[\text{C}_{16}\text{H}_{24}\text{O}_2, \text{M}]^+$  264.1725, found 264.1727

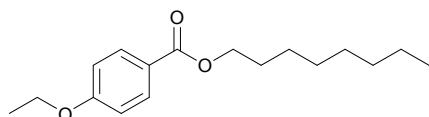

**Octyl 4-ethoxybenzoate:** colorless liquid. (Table3, **4ha**)

$^1\text{H NMR}$  (400 MHz,  $\text{CDCl}_3$ )  $\delta$  7.89 (d,  $J = 8.7$  Hz, 2 H), 6.79 (d,  $J = 8.7$  Hz, 2 H), 4.18 (t,  $J = 6.6$  Hz, 2 H), 3.96 (q,  $J = 6.9$  Hz, 2 H), 1.68 – 1.61 (m, 2 H), 1.34 – 1.30 (m, 5 H), 1.28 – 1.12 (m, 8 H), 0.79 (t,  $J = 6.4$  Hz, 3 H).

$^{13}\text{C NMR}$  (100 MHz,  $\text{CDCl}_3$ )  $\delta$  166.3, 162.5, 131.4, 122.6, 113.8, 64.7, 63.5, 31.7, 29.17, 29.11, 28.7, 26.0, 22.5, 14.5, 14.0.

IR (ATR):  $1717\text{ cm}^{-1}$ , HRMS (EI) calc. for  $[\text{C}_{17}\text{H}_{26}\text{O}_3, \text{M}]^+$  278.1882, found 278.1884

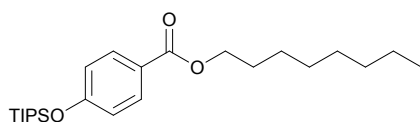

**Octyl 4-(triisopropylsilyloxy)benzoate:** colorless liquid. (Table3, **4ia**)

$^1\text{H NMR}$  (400 MHz,  $\text{CDCl}_3$ )  $\delta$  7.86 (d,  $J = 8.9$  Hz, 2 H), 6.82 (d,  $J = 8.8$  Hz, 2 H), 4.20 (t,  $J = 6.7$  Hz, 2 H), 1.71 – 1.63 (m, 2H), 1.40 – 1.32 (m, 2H), 1.23 (m, 10 H), 1.04 (s, 9 H), 1.02 (s, 7 H), 0.81 (t,  $J = 6.7$  Hz, 3 H).

$^{13}\text{C NMR}$  (100 MHz,  $\text{CDCl}_3$ )  $\delta$  166.5, 160.3, 131.5, 123.3, 119.6, 64.8, 31.8, 29.26, 29.20, 28.8, 26.1, 22.6, 17.9,

14.1, 12.7.

IR (ATR): 1705  $\text{cm}^{-1}$ , HRMS (EI) calc. for  $[\text{C}_{24}\text{H}_{42}\text{O}_3\text{Si}, \text{M}]^+$  406.2903, found 406.2906

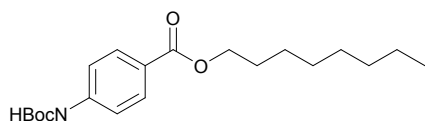

**Octyl 4-((tert-butoxycarbonyl)amino)benzoate:** colorless liquid. (Table3, **4ja**)

$^1\text{H}$  NMR (400 MHz,  $\text{CDCl}_3$ )  $\delta$  7.89 (d,  $J = 8.4$  Hz, 2 H), 7.37 (d,  $J = 8.4$  Hz, 2 H), 6.86 (s, 1 H), 4.21 (t,  $J = 6.6$  Hz, 2 H), 1.70 – 1.63 (m, 2 H), 1.43 (s, 9 H), 1.37 – 1.33 (m, 2 H), 1.23 – 1.20 (m, 8 H), 0.79 (t,  $J = 6.8$  Hz, 3 H).

$^{13}\text{C}$  NMR (100 MHz,  $\text{CDCl}_3$ )  $\delta$  166.3, 152.2, 142.7, 130.8, 124.6, 117.3, 81.0, 64.9, 31.7, 29.19, 29.13, 28.7, 28.2, 26.0, 22.6, 14.0.

IR (ATR): 1704  $\text{cm}^{-1}$ , HRMS (EI) calc. for  $[\text{C}_{20}\text{H}_{31}\text{O}_4\text{N}, \text{M}]^+$  349.2253, found 349.2255

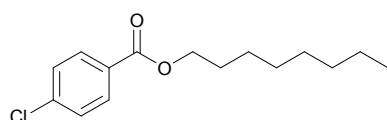

**Octyl 4-chlorobenzoate:** colorless liquid. (Table3, **4ka**) with octyl ester impurities

$^1\text{H}$  NMR (400 MHz,  $\text{cdcl}_3$ )  $\delta$  7.90 (d,  $J = 8.2$  Hz, 2 H), 7.33 (d,  $J = 8.5$  Hz, 2 H), 4.23 (t,  $J = 6.7$  Hz, 2 H), 1.72 – 1.64 (m, 2 H), 1.38 – 1.32 (m, 2 H), 1.23 – 1.20 (m, 8 H), 0.81 (t,  $J = 4.5$  Hz, 3 H).

$^{13}\text{C}$  NMR (100 MHz,  $\text{CDCl}_3$ )  $\delta$  165.7, 139.2, 130.9, 128.9, 128.6, 65.4, 31.8, 29.20, 29.15, 28.6, 26.0, 22.6, 14.1.

IR (ATR): 1700  $\text{cm}^{-1}$ , HRMS (EI) calc. for  $[\text{C}_{15}\text{H}_{21}\text{O}_2\text{Cl}, \text{M}]^+$  268.1230, found 268.1233

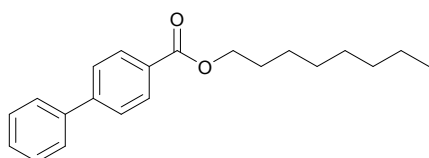

**Octyl [1,1'-biphenyl]-4-carboxylate:** colorless liquid. (Table3, **4la**)

$^1\text{H}$  NMR (400 MHz,  $\text{CDCl}_3$ )  $\delta$  8.04 (d,  $J = 8.0$  Hz, 2 H), 7.57 (dd,  $J = 13.8, 7.8$  Hz, 4 H), 7.40 (t,  $J = 7.4$  Hz, 2 H), 7.32 (t,  $J = 7.2$  Hz, 1 H), 4.27 (t,  $J = 6.6$  Hz, 2 H), 1.76 – 1.67 (m, 2 H), 1.42 – 1.35 (m, 2 H), 1.31 – 1.18 (m, 8 H), 0.82 (t,  $J = 6.3$  Hz, 3 H).

$^{13}\text{C}$  NMR (100 MHz,  $\text{cdcl}_3$ )  $\delta$  166.6, 145.5, 140.1, 130.0, 129.3, 128.9, 128.1, 127.3, 127.0, 65.2, 31.8, 29.26, 29.20, 28.8, 26.1, 22.6, 14.1.

IR (ATR): 1720  $\text{cm}^{-1}$ , HRMS (EI) calc. for  $[\text{C}_{21}\text{H}_{26}\text{O}_2, \text{M}]^+$  310.1933, found 310.1934

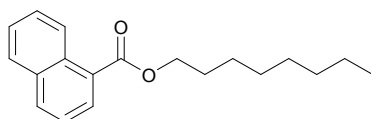

**Octyl 1-naphthoate:** colorless liquid. (Table3, **4ma**)

$^1\text{H}$  NMR (400 MHz,  $\text{CDCl}_3$ )  $\delta$  8.83 (d,  $J = 8.6$  Hz, 1 H), 8.08 (d,  $J = 6.9$  Hz, 1 H), 7.90 (d,  $J = 8.2$  Hz, 1 H), 7.77 (d,  $J = 8.1$  Hz, 1 H), 7.51 (t,  $J = 7.6$  Hz, 1 H), 7.41 (dt,  $J = 14.1, 7.6$  Hz, 2 H), 4.32 (t,  $J = 6.6$  Hz, 2 H), 1.78 – 1.68 (m, 2 H), 1.42 – 1.35 (m, 2 H), 1.31 – 1.15 (m, 8 H), 0.80 (t,  $J = 5.8$  Hz, 3 H).

$^{13}\text{C}$  NMR (100 MHz,  $\text{CDCl}_3$ )  $\delta$  167.6, 133.8, 133.1, 131.3, 130.0, 128.4, 127.6, 127.4, 126.1, 125.8, 124.4, 65.2, 31.7, 29.20, 29.15, 28.7, 26.1, 22.6, 14.0.

IR (ATR):  $1716\text{ cm}^{-1}$ , HRMS (EI) calc. for  $[\text{C}_{19}\text{H}_{24}\text{O}_2, \text{M}]^+$  284.1776, found 284.1779

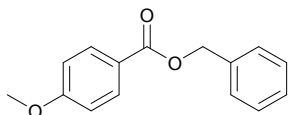

**Benzyl 4-methoxybenzoate:** colorless liquid. (Table 4, **4ab**)

$^1\text{H}$  NMR (400 MHz,  $\text{CDCl}_3$ )  $\delta$  7.96 (d,  $J = 8.8$  Hz, 2 H), 7.36 (d,  $J = 7.2$  Hz, 2 H), 7.33 – 7.22 (m, 3 H), 6.83 (d,  $J = 8.8$  Hz, 2 H), 5.26 (s, 2 H), 3.77 (s, 3 H).

$^{13}\text{C}$  NMR (100 MHz,  $\text{CDCl}_3$ )  $\delta$  166.1, 163.4, 136.3, 131.7, 128.5, 128.10, 128.06, 122.5, 113.6, 66.4, 55.4.

IR (ATR):  $1715\text{ cm}^{-1}$ , HRMS (EI) calc. for  $[\text{C}_{15}\text{H}_{14}\text{O}_3, \text{M}]^+$  242.0943, found 242.0941

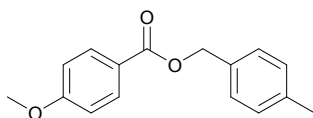

**4-Methylbenzyl 4-methoxybenzoate:** white crystal. (Table 4, **4ac**)

$^1\text{H}$  NMR (400 MHz,  $\text{CDCl}_3$ )  $\delta$  7.92 (d,  $J = 8.5$  Hz, 2 H), 7.23 (d,  $J = 7.7$  Hz, 2 H), 7.08 (d,  $J = 7.6$  Hz, 2 H), 6.79 (d,  $J = 8.3$  Hz, 2 H), 5.19 (s, 2 H), 3.72 (s, 3 H), 2.25 (s, 3 H).

$^{13}\text{C}$  NMR (100 MHz,  $\text{CDCl}_3$ )  $\delta$  166.1, 163.3, 137.9, 133.2, 131.6, 129.1, 128.2, 122.6, 113.5, 66.3, 55.4, 21.1.

IR (ATR):  $1708\text{ cm}^{-1}$ , HRMS (EI) calc. for  $[\text{C}_{16}\text{H}_{16}\text{O}_3, \text{M}]^+$  256.1099, found 256.1102, m.p.  $38.4\text{ }^\circ\text{C}$

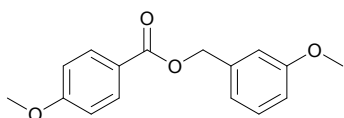

**3-Methoxybenzyl 4-methoxybenzoate:** colorless liquid. (Table 4, **4ad**)

$^1\text{H}$  NMR (400 MHz,  $\text{CDCl}_3$ )  $\delta$  7.94 (d,  $J = 8.7$  Hz, 2 H), 7.20 (t,  $J = 7.9$  Hz, 1 H), 6.98 – 6.85 (m, 2 H), 6.85 – 6.71 (m, 3 H), 5.21 (s, 2 H), 3.74 (s, 3 H), 3.71 (s, 3 H).

$^{13}\text{C}$  NMR (100 MHz,  $\text{CDCl}_3$ )  $\delta$  166.0, 163.4, 159.7, 137.8, 131.7, 129.5, 122.4, 120.2, 113.6, 113.5, 113.6, 66.2, 55.3, 55.2.

IR (ATR):  $1712\text{ cm}^{-1}$ , HRMS (EI) calc. for  $[\text{C}_{16}\text{H}_{16}\text{O}_4, \text{M}]^+$  272.1049, found 272.1051

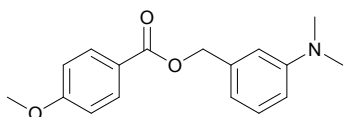

**3-(Dimethylamino)benzyl 4-methoxybenzoate:** dark green liquid. (Table 4, **4ae**)

$^1\text{H}$  NMR (400 MHz,  $\text{CDCl}_3$ )  $\delta$  7.94 (d,  $J = 8.8$  Hz, 2 H), 7.15 (t,  $J = 7.8$  Hz, 1 H), 6.80 (d,  $J = 8.8$  Hz, 2 H), 6.70 (d,  $J = 7.8$  Hz, 2 H), 6.60 (d,  $J = 8.5$  Hz, 1 H), 5.19 (s, 2 H), 3.73 (s, 3 H), 2.85 (s, 6 H).

$^{13}\text{C}$  NMR (100 MHz,  $\text{CDCl}_3$ )  $\delta$  166.2, 163.3, 150.7, 137.0, 131.7, 129.2, 122.6, 116.2, 113.5, 112.2, 112.1, 67.0,

55.3, 40.5.

IR (ATR): 1709  $\text{cm}^{-1}$ , HRMS (EI) calc. for  $[\text{C}_{17}\text{H}_{19}\text{O}_3\text{N}, \text{M}]^+$  285.1365, found 285.1366

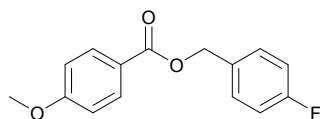

**4-Fluorobenzyl 4-methoxybenzoate:** white solid. (Table 4, **4af**)

$^1\text{H}$  NMR (400 MHz,  $\text{CDCl}_3$ )  $\delta$  7.92 (d,  $J = 8.9$  Hz, 2 H), 7.31 (dd,  $J = 8.5, 5.5$  Hz, 2 H), 6.96 (t,  $J = 8.7$  Hz, 2 H), 6.81 (d,  $J = 8.9$  Hz, 2 H), 5.19 (s, 2 H), 3.74 (s, 3 H).

$^{13}\text{C}$  NMR (101 MHz,  $\text{CDCl}_3$ )  $\delta$  166.1, 163.8, 163.4, 161.3, 132.11, 132.08, 131.7, 130.9, 130.02, 122.4, 115.5, 115.3, 113.6, 65.6, 55.4.

IR (ATR): 1711  $\text{cm}^{-1}$ , HRMS (EI) calc. for  $[\text{C}_{15}\text{H}_{13}\text{O}_3\text{F}, \text{M}]^+$  260.0849, found 260.0850, m.p.: 54  $^\circ\text{C}$

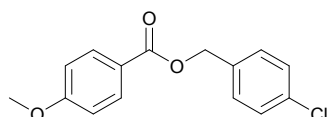

**4-Chlorobenzyl 4-methoxybenzoate:** white solid. (Table 4, **4ag**)

$^1\text{H}$  NMR (400 MHz,  $\text{CDCl}_3$ )  $\delta$  7.91 (d,  $J = 8.8$  Hz, 2 H), 7.24 (q,  $J = 8.6$  Hz, 4 H), 6.80 (d,  $J = 8.8$  Hz, 2 H), 5.18 (s, 2 H), 3.73 (s, 3 H).

$^{13}\text{C}$  NMR (100 MHz,  $\text{CDCl}_3$ )  $\delta$  165.9, 163.4, 134.7, 133.9, 131.6, 129.4, 128.6, 122.2, 113.6, 65.4, 55.3.

IR (ATR): 1712  $\text{cm}^{-1}$ , HRMS (EI) calc. for  $[\text{C}_{15}\text{H}_{13}\text{O}_3\text{Cl}, \text{M}]^+$  276.0553, found 276.0552, m.p. : 86  $^\circ\text{C}$

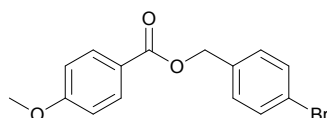

**4-Bromobenzyl 4-methoxybenzoate:** white solid. (Table 4, **4ah**)

$^1\text{H}$  NMR (400 MHz,  $\text{CDCl}_3$ )  $\delta$  7.91 (d,  $J = 8.9$  Hz, 2 H), 7.39 (d,  $J = 8.3$  Hz, 2 H), 7.20 (d,  $J = 8.3$  Hz, 2 H), 6.81 (d,  $J = 8.9$  Hz, 2 H), 5.17 (s, 2 H), 3.74 (s, 3 H).

$^{13}\text{C}$  NMR (100 MHz,  $\text{CDCl}_3$ )  $\delta$  165.9, 163.4, 135.3, 131.64, 131.61, 129.7, 122.2, 122.1, 113.6, 65.5, 55.3.

IR (ATR): 1713  $\text{cm}^{-1}$ , HRMS (EI) calc. for  $[\text{C}_{15}\text{H}_{13}\text{O}_3\text{Br}, \text{M}]^+$  320.0048, found 320.0049, m.p. : 94  $^\circ\text{C}$

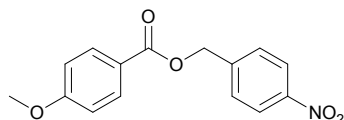

**4-Nitrobenzyl 4-methoxybenzoate:** yellow crystal. (Table 4, **4ai**)

$^1\text{H}$  NMR (400 MHz,  $\text{CDCl}_3$ )  $\delta$  8.12 (d,  $J = 8.4$  Hz, 2 H), 7.94 (d,  $J = 8.6$  Hz, 2 H), 7.49 (d,  $J = 8.3$  Hz, 2 H), 6.84 (d,  $J = 8.6$  Hz, 2 H), 5.33 (s, 2 H), 3.76 (s, 3 H).

$^{13}\text{C}$  NMR (100 MHz,  $\text{CDCl}_3$ )  $\delta$  165.7, 163.6, 147.5, 143.6, 131.7, 128.1, 123.7, 121.7, 113.7, 64.8, 55.4.

IR (ATR):  $1714\text{ cm}^{-1}$ , HRMS (EI) calc. for  $[\text{C}_{15}\text{H}_{13}\text{O}_5\text{N}, \text{M}]^+$  287.0794, found 287.0795, m.p. :  $132\text{ }^\circ\text{C}$

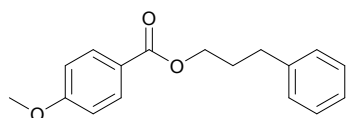

**3-Phenylpropyl 4-methoxybenzoate:** colorless liquid. (Table 4, **4aj**)

$^1\text{H}$  NMR (400 MHz,  $\text{CDCl}_3$ )  $\delta$  7.89 (d,  $J = 8.5$  Hz, 2 H), 7.17 (d,  $J = 7.0$  Hz, 2 H), 7.10 (d,  $J = 6.5$  Hz, 3 H), 6.80 (d,  $J = 8.2$  Hz, 2 H), 4.20 (t,  $J = 6.1$  Hz, 2 H), 3.72 (s, 3 H), 2.67 (t,  $J = 7.4$  Hz, 2 H), 1.98 (t,  $J = 5.2$  Hz, 2 H).

$^{13}\text{C}$  NMR (100 MHz,  $\text{CDCl}_3$ )  $\delta$  166.2, 163.2, 141.2, 131.6, 131.5, 128.3, 125.9, 122.7, 113.5, 63.9, 55.3, 32.2, 30.3.

IR (ATR):  $1716\text{ cm}^{-1}$ , HRMS (EI) calc. for  $[\text{C}_{17}\text{H}_{18}\text{O}_3, \text{M}]^+$  270.1256, found 270.1253,

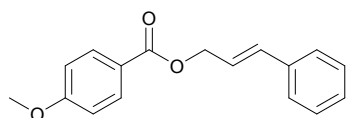

**Cinnamyl 4-methoxybenzoate:** colorless liquid. (Table 4, **4ak**)

$^1\text{H}$  NMR (400 MHz,  $\text{CDCl}_3$ )  $\delta$  7.94 (d,  $J = 8.6$  Hz, 2 H), 7.30 (d,  $J = 7.5$  Hz, 2 H), 7.21 (t,  $J = 7.4$  Hz, 2 H), 7.15 (d,  $J = 7.0$  Hz, 1 H), 6.81 (d,  $J = 8.5$  Hz, 2 H), 6.62 (d,  $J = 15.9$  Hz, 1 H), 6.29 (dt,  $J = 13.1, 6.3$  Hz, 1 H), 4.84 (d,  $J = 6.2$  Hz, 2 H), 3.72 (s, 3 H).

$^{13}\text{C}$  NMR (100 MHz,  $\text{CDCl}_3$ )  $\delta$  166.0, 163.3, 136.2, 133.9, 131.6, 128.5, 127.9, 126.5, 123.5, 122.5, 113.5, 65.1, 55.3.

IR (ATR):  $1709\text{ cm}^{-1}$ , HRMS (EI) calc. for  $[\text{C}_{17}\text{H}_{16}\text{O}_3, \text{M}]^+$  268.1099 found 268.1097

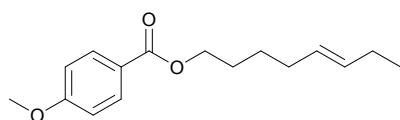

**(E)-Oct-5-en-1-yl 4-methoxybenzoate:** colorless liquid. (Table 4, **4al**) with regioisomer

$^1\text{H}$  NMR (400 MHz,  $\text{CDCl}_3$ )  $\delta$  7.91 (d,  $J = 8.4$  Hz, 2 H), 6.82 (d,  $J = 8.3$  Hz, 2 H), 5.42 – 5.20 (m, 2 H), 4.20 (t,  $J = 6.5$  Hz, 2 H), 3.75 (s, 3 H), 2.04 – 1.92 (m, 4 H), 1.73 – 1.63 (m, 2 H), 1.45 – 1.37 (m, 2 H), 0.87 (t,  $J = 7.5$  Hz, 3 H).

$^{13}\text{C}$  NMR (100 MHz,  $\text{CDCl}_3$ )  $\delta$  166.3, 163.2, 132.1, 131.4, 128.4, 122.8, 113.4, 64.5, 55.3, 28.2, 26.6, 26.1, 20.5, 14.3.

IR (ATR):  $1702\text{ cm}^{-1}$ , HRMS (EI) calc. for  $[\text{C}_{16}\text{H}_{22}\text{O}_3, \text{M}]^+$  262.1569 found 262.1568

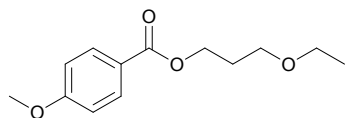

**3-Ethoxypropyl 4-methoxybenzoate:** colorless liquid. (Table 4, **4am**)

$^1\text{H}$  NMR (400 MHz,  $\text{CDCl}_3$ )  $\delta$  7.90 (d,  $J = 8.1$  Hz, 2 H), 6.81 (d,  $J = 8.1$  Hz, 2 H), 4.29 (t,  $J = 6.0$  Hz, 2 H), 3.75 (s, 3 H), 3.47 (t,  $J = 5.9$  Hz, 2 H), 3.40 (d,  $J = 6.8$  Hz, 2 H), 1.98 – 1.90 (m, 2 H), 1.10 (t,  $J = 6.7$  Hz, 3 H).

$^{13}\text{C}$  NMR (100 MHz,  $\text{CDCl}_3$ )  $\delta$  166.1, 163.2, 131.4, 122.7, 113.4, 67.0, 66.1, 61.8, 55.3, 29.1, 15.0.

IR (ATR):  $1713\text{ cm}^{-1}$ , HRMS (EI) calc. for  $[\text{C}_{13}\text{H}_{18}\text{O}_4, \text{M}]^+$  238.1205 found 238.1206

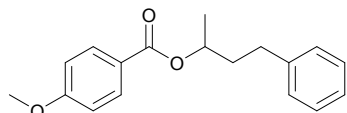

**4-Phenylbutan-2-yl 4-methoxybenzoate:** colorless liquid. (Table 4, **4an**)

$^1\text{H}$  NMR (400 MHz,  $\text{CDCl}_3$ )  $\delta$  7.90 (d,  $J = 8.7$  Hz, 2 H), 7.16 (t,  $J = 7.4$  Hz, 2 H), 7.08 (d,  $J = 7.5$  Hz, 3 H), 6.81 (d,  $J = 8.7$  Hz, 2 H), 5.06 (dd,  $J = 12.4, 6.2$  Hz, 1 H), 3.73 (s, 3 H), 2.68 – 2.56 (m, 2 H), 2.02 – 1.94 (m, 1 H), 1.86 – 1.79 (m, 1 H), 1.26 (d,  $J = 6.2$  Hz, 3 H).

$^{13}\text{C}$  NMR (100 MHz,  $\text{CDCl}_3$ )  $\delta$  165.8, 163.2, 141.5, 131.4, 128.3, 128.2, 125.8, 123.1, 113.5, 70.7, 55.3, 37.7, 31.8, 20.1.

IR (ATR):  $1700\text{ cm}^{-1}$ , HRMS (EI) calc. for  $[\text{C}_{18}\text{H}_{20}\text{O}_3, \text{M}]^+$  284.1412 found 284.1414

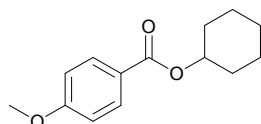

**Cyclohexyl 4-methoxybenzoate:** colorless liquid. (Table 4, **4ao**)

$^1\text{H}$  NMR (400 MHz,  $\text{CDCl}_3$ )  $\delta$  7.91 (d,  $J = 8.7$  Hz, 2 H), 6.81 (d,  $J = 8.7$  Hz, 2 H), 4.94 – 4.85 (m, 1 H), 3.74 (s, 3 H), 1.87 – 1.83 (m, 2 H), 1.73 – 1.65 (m, 2 H), 1.53 – 1.44 (m, 3 H), 1.38 – 1.22 (m, 3 H).

$^{13}\text{C}$  NMR (100 MHz,  $\text{CDCl}_3$ )  $\delta$  165.6, 163.1, 131.4, 123.3, 113.4, 72.5, 55.3, 31.6, 25.4, 23.6.

IR (ATR):  $1704\text{ cm}^{-1}$ , HRMS (EI) calc. for  $[\text{C}_{14}\text{H}_{18}\text{O}_3, \text{M}]^+$  234.1256 found 234.1258

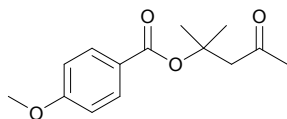

**2-Methyl-4-oxopent-2-yl 4-methoxybenzoate:** colorless liquid. (Table 4, **4ap**)

$^1\text{H}$  NMR (400 MHz,  $\text{CDCl}_3$ )  $\delta$  7.85 (d,  $J = 5.3$  Hz, 2 H), 6.82 (d,  $J = 5.3$  Hz, 2 H), 3.77 (s, 3 H), 3.09 (s, 2 H), 2.08 (s, 3 H), 1.57 (s, 6 H).

$^{13}\text{C}$  NMR (100 MHz,  $\text{CDCl}_3$ )  $\delta$  206.0, 165.6, 163.2, 131.4, 123.8, 113.5, 80.4, 55.4, 52.4, 31.7, 26.6.

IR (ATR):  $1703\text{ cm}^{-1}$ , HRMS (EI) calc. for  $[\text{C}_{14}\text{H}_{18}\text{O}_4, \text{M}]^+$  250.1205 found 250.1205

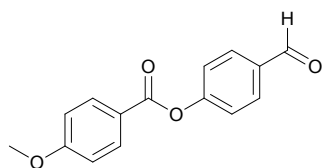

**4-Formylphenyl 4-methoxybenzoate:** colorless liquid. (Table 4, **4aq**)

$^1\text{H}$  NMR (400 MHz,  $\text{CDCl}_3$ )  $\delta$  9.94 (s, 1 H), 8.08 (d,  $J = 8.7$  Hz, 2 H), 7.88 (d,  $J = 8.3$  Hz, 2 H), 7.32 (d,  $J = 8.3$

Hz, 2 H), 6.92 (d,  $J = 8.7$  Hz, 2 H), 3.83 (s, 3 H).

$^{13}\text{C}$  NMR (100 MHz,  $\text{CDCl}_3$ )  $\delta$  191.0, 164.2, 164.1, 155.8, 133.9, 132.4, 131.2, 122.6, 121.1, 114.0, 55.5.

IR (ATR): 1724, 1695  $\text{cm}^{-1}$ , HRMS (EI) calc. for  $[\text{C}_{15}\text{H}_{12}\text{O}_4, \text{M}]^+$  256.0736 found 256.0733

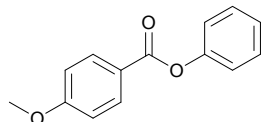

**Phenyl 4-methoxybenzoate:** pale brown crystal. (Table 4, **4ar**)

$^1\text{H}$  NMR (400 MHz,  $\text{CDCl}_3$ )  $\delta$  8.07 (d,  $J = 7.7$  Hz, 2 H), 7.32 (t,  $J = 6.7$  Hz, 2 H), 7.18 – 7.09 (m, 3 H), 6.89 (d,  $J = 7.7$  Hz, 2 H), 3.78 (s, 3 H).

$^{13}\text{C}$  NMR (100 MHz,  $\text{CDCl}_3$ )  $\delta$  164.8, 163.8, 151.0, 132.2, 129.4, 125.6, 121.8, 121.7, 113.8, 55.4.

IR (ATR): 1732  $\text{cm}^{-1}$ , HRMS (EI) calc. for  $[\text{C}_{14}\text{H}_{12}\text{O}_3, \text{M}]^+$  228.0786 found 228.0782, m.p.: 74 °C

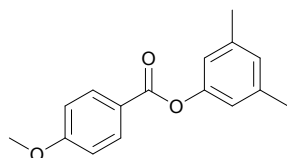

**3,5-Dimethylphenyl 4-methoxybenzoate:** pale brown solid. (Table 4, **4as**)

$^1\text{H}$  NMR (400 MHz,  $\text{CDCl}_3$ )  $\delta$  8.04 (d,  $J = 8.4$  Hz, 2 H), 6.86 (d,  $J = 8.5$  Hz, 2 H), 6.78 (s, 1 H), 6.72 (s, 2 H), 3.76 (s, 3 H), 2.23 (s, 6 H).

$^{13}\text{C}$  NMR (100 MHz,  $\text{CDCl}_3$ )  $\delta$  165.0, 163.7, 150.9, 139.1, 132.1, 127.4, 121.9, 119.3, 113.7, 55.4, 21.2.

IR (ATR): 1725  $\text{cm}^{-1}$ , HRMS (EI) calc. for  $[\text{C}_{16}\text{H}_{16}\text{O}_3, \text{M}]^+$  256.1099 found 256.1103, m.p.: 62 °C

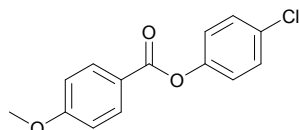

**4-Chlorophenyl 4-methoxybenzoate:** pale brown crystal. (Table 4, **4at**)

$^1\text{H}$  NMR (400 MHz,  $\text{CDCl}_3$ )  $\delta$  8.00 (d,  $J = 5.7$  Hz, 2 H), 7.23 (d,  $J = 5.6$  Hz, 2 H), 7.02 (d,  $J = 5.6$  Hz, 2 H), 6.84 (d,  $J = 5.8$  Hz, 2 H), 3.74 (s, 3 H).

$^{13}\text{C}$  NMR (100 MHz,  $\text{CDCl}_3$ )  $\delta$  164.5, 163.9, 149.4, 132.2, 130.9, 129.3, 123.1, 121.3, 113.8, 55.4.

IR (ATR): 1728  $\text{cm}^{-1}$ , HRMS (EI) calc. for  $[\text{C}_{14}\text{H}_{11}\text{O}_3\text{Cl}, \text{M}]^+$  262.0397 found 262.0400, m.p.: 96 °C

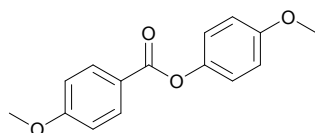

**4-Methoxyphenyl 4-methoxybenzoate:** pale brown crystal. (Table 4, **4au**)

$^1\text{H}$  NMR (400 MHz,  $\text{CDCl}_3$ )  $\delta$  8.04 (d,  $J = 8.6$  Hz, 2 H), 7.02 (d,  $J = 8.7$  Hz, 2 H), 6.85 (dd,  $J = 16.4, 8.7$  Hz, 4 H), 3.77 (s, 3 H), 3.70 (s, 3 H).

$^{13}\text{C}$  NMR (100 MHz,  $\text{CDCl}_3$ )  $\delta$  165.2, 163.7, 157.1, 144.4, 132.1, 122.4, 121.8, 114.4, 113.7, 55.46, 55.40.

IR (ATR): 1728  $\text{cm}^{-1}$ , HRMS (EI) calc. for  $[\text{C}_{15}\text{H}_{14}\text{O}_4, \text{M}]^+$  258.0892 found 258.0890, m.p.: 124 °C



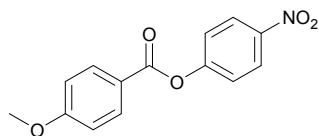

**4-Nitrophenyl 4-methoxybenzoate:** pale brown crystal. (Table 4, **4av**)

$^1\text{H NMR}$  (400 MHz,  $\text{CDCl}_3$ )  $\delta$  8.23 (d,  $J = 9.0$  Hz, 2 H), 8.07 (d,  $J = 8.8$  Hz, 2 H), 7.33 (d,  $J = 9.0$  Hz, 2 H), 6.93 (d,  $J = 8.8$  Hz, 2 H), 3.83 (s, 3 H).

$^{13}\text{C NMR}$  (100 MHz,  $\text{CDCl}_3$ )  $\delta$  164.4, 163.9, 155.9, 145.2, 132.5, 125.2, 122.6, 120.7, 114.0, 55.6.

IR (ATR):  $1735\text{ cm}^{-1}$ , HRMS (EI) calc. for  $[\text{C}_{14}\text{H}_{11}\text{O}_5\text{N}, \text{M}]^+$  273.0637 found 273.0639, m.p.:  $167\text{ }^\circ\text{C}$

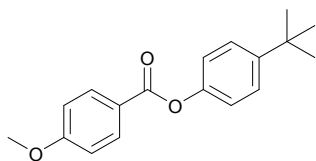

**4-(tert-Butyl)phenyl 4-methoxybenzoate:** pale brown crystal. (Table 4, **4aw**)

$^1\text{H NMR}$  (400 MHz,  $\text{CDCl}_3$ )  $\delta$  8.07 (d,  $J = 7.9$  Hz, 2 H), 7.34 (d,  $J = 7.6$  Hz, 2 H), 7.04 (d,  $J = 7.4$  Hz, 2 H), 6.89 (d,  $J = 7.9$  Hz, 2 H), 3.79 (s, 3 H), 1.25 (s, 9 H).

$^{13}\text{C NMR}$  (100 MHz,  $\text{CDCl}_3$ )  $\delta$  165.0, 163.8, 148.6, 148.4, 132.2, 126.3, 122.0, 121.0, 113.7, 55.4, 34.4, 31.4.

IR (ATR):  $1729\text{ cm}^{-1}$ , HRMS (EI) calc. for  $[\text{C}_{18}\text{H}_{20}\text{O}_3, \text{M}]^+$  284.1412 found 284.1411, m.p.:  $103\text{ }^\circ\text{C}$

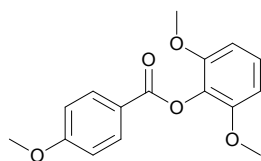

**2,6-Dimethoxyphenyl 4-methoxybenzoate:** pale brown crystal. (Table 4, **4ax**)

$^1\text{H NMR}$  (400 MHz,  $\text{CDCl}_3$ )  $\delta$  8.11 (d,  $J = 8.7$  Hz, 2H), 7.07 (d,  $J = 8.4$  Hz, 1H), 6.88 (d,  $J = 8.7$  Hz, 2H), 6.55 (d,  $J = 8.4$  Hz, 2H), 3.77 (s, 3H), 3.70 (s, 6H).

$^{13}\text{C NMR}$  (100 MHz,  $\text{CDCl}_3$ )  $\delta$  164.2, 163.6, 152.5, 132.4, 128.9, 126.1, 121.7, 113.6, 104.9, 56.1, 55.4.

IR (ATR):  $1734\text{ cm}^{-1}$ , HRMS (EI) calc. for  $[\text{C}_{16}\text{H}_{16}\text{O}_5, \text{M}]^+$  288.0998 found 288.0999, m.p.:  $119\text{ }^\circ\text{C}$

## VI. NMR Spectra of Isolated Products

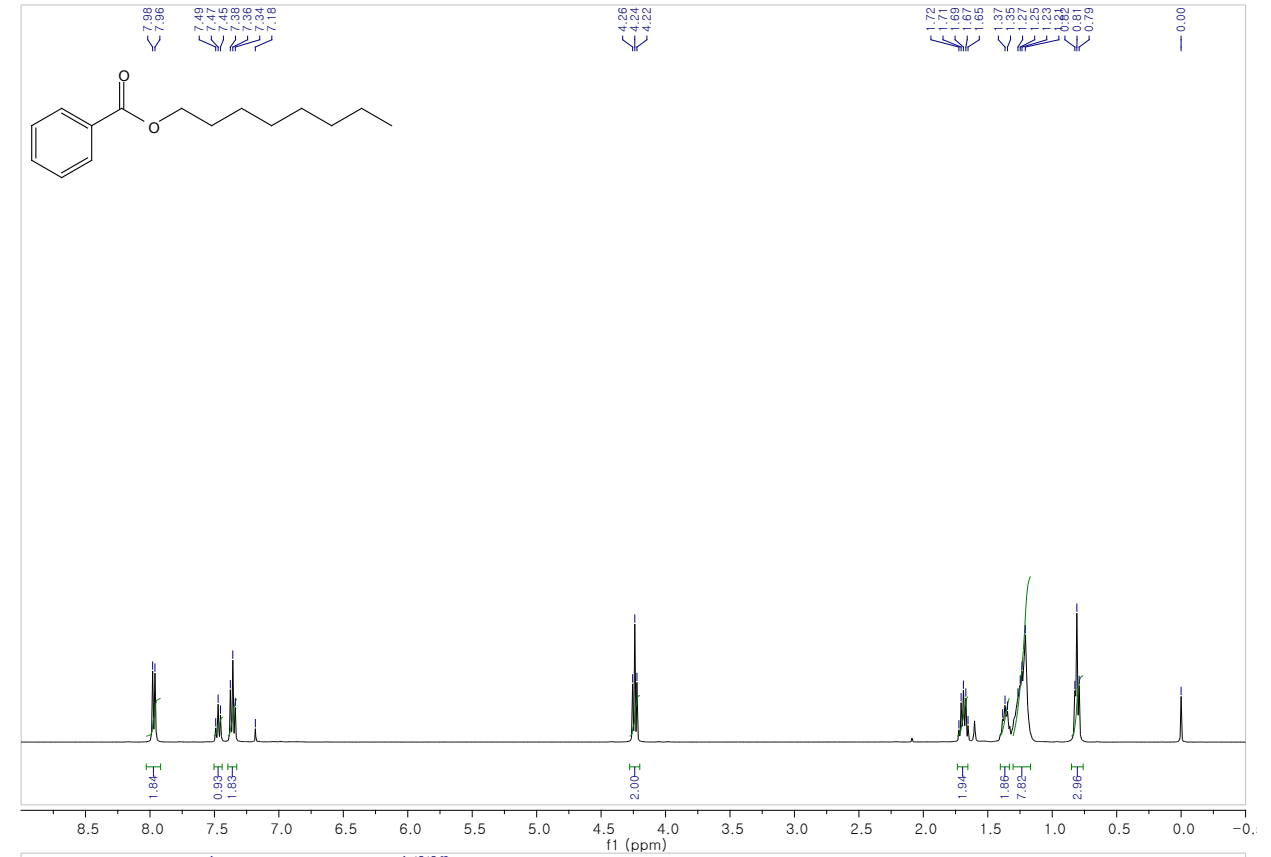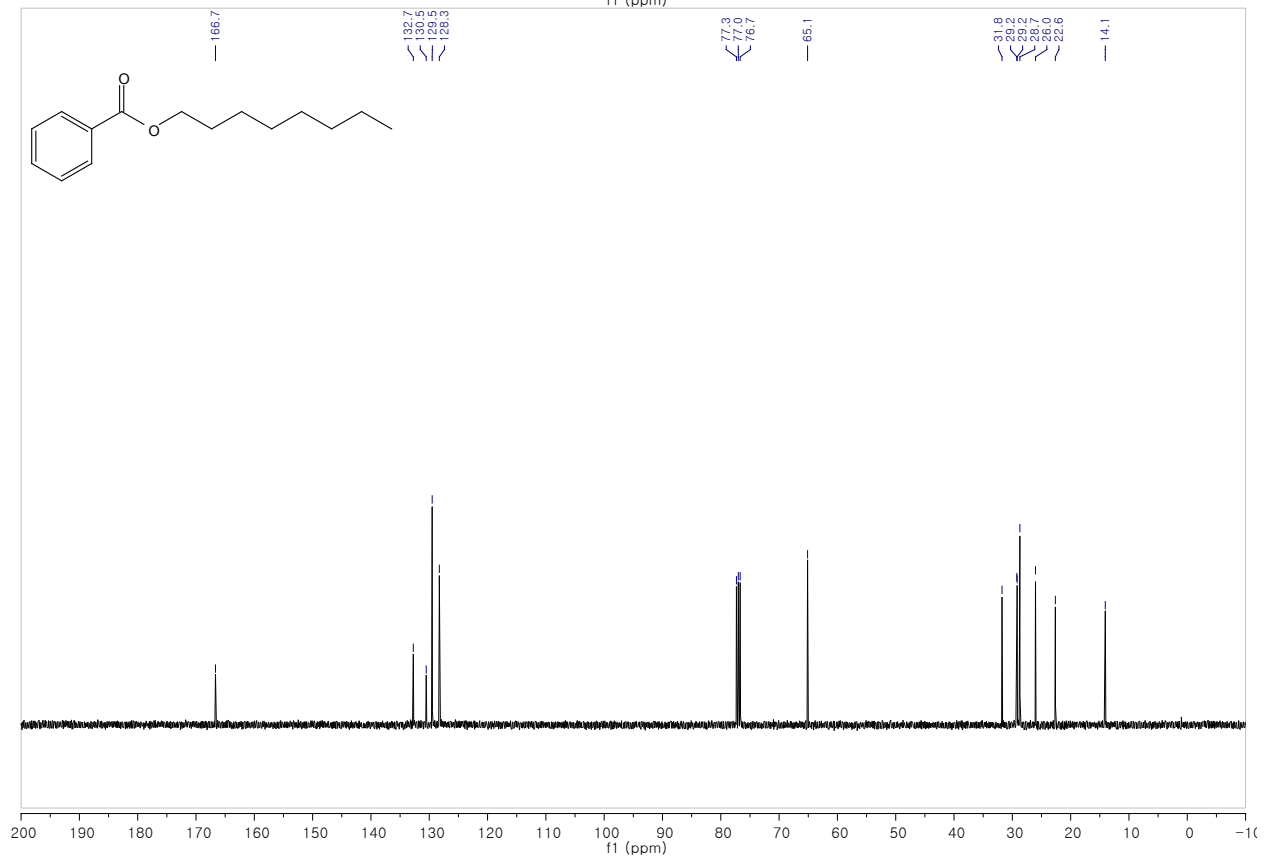

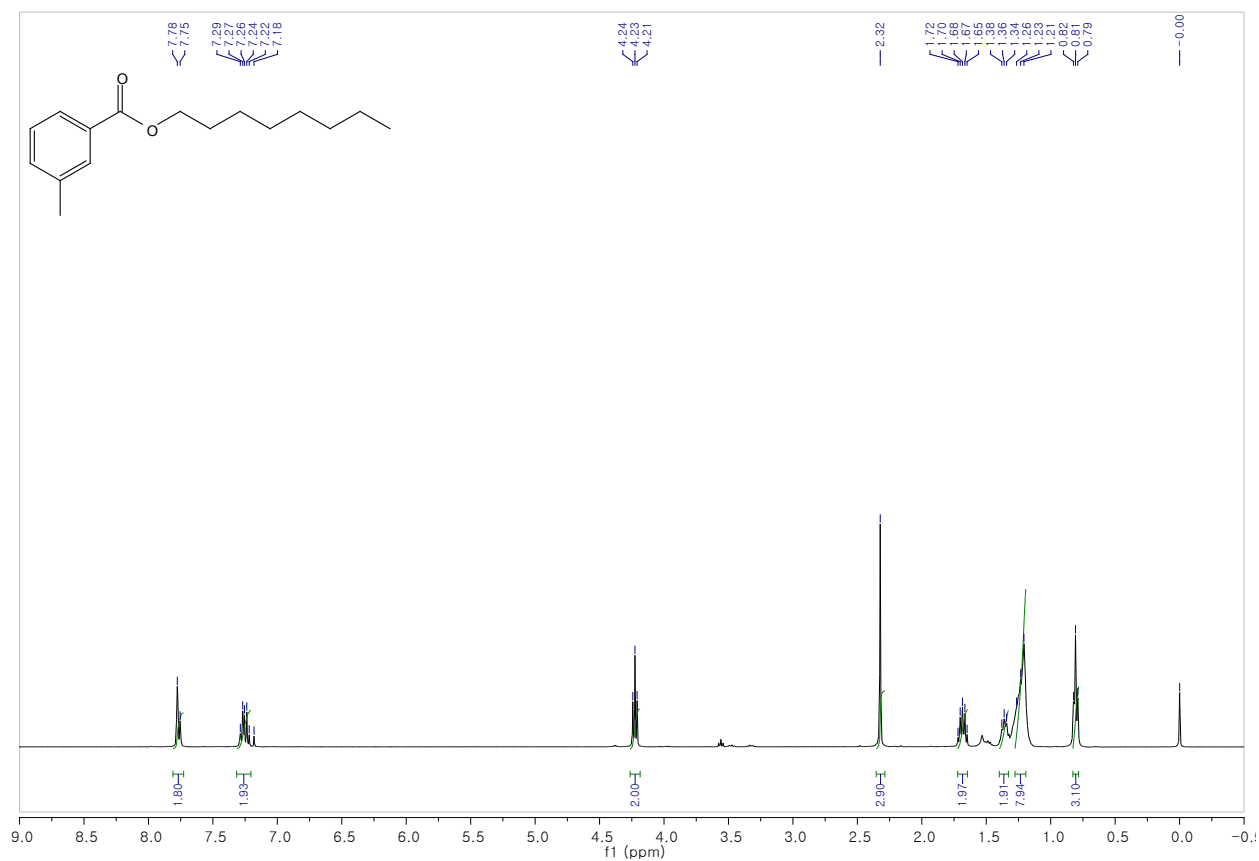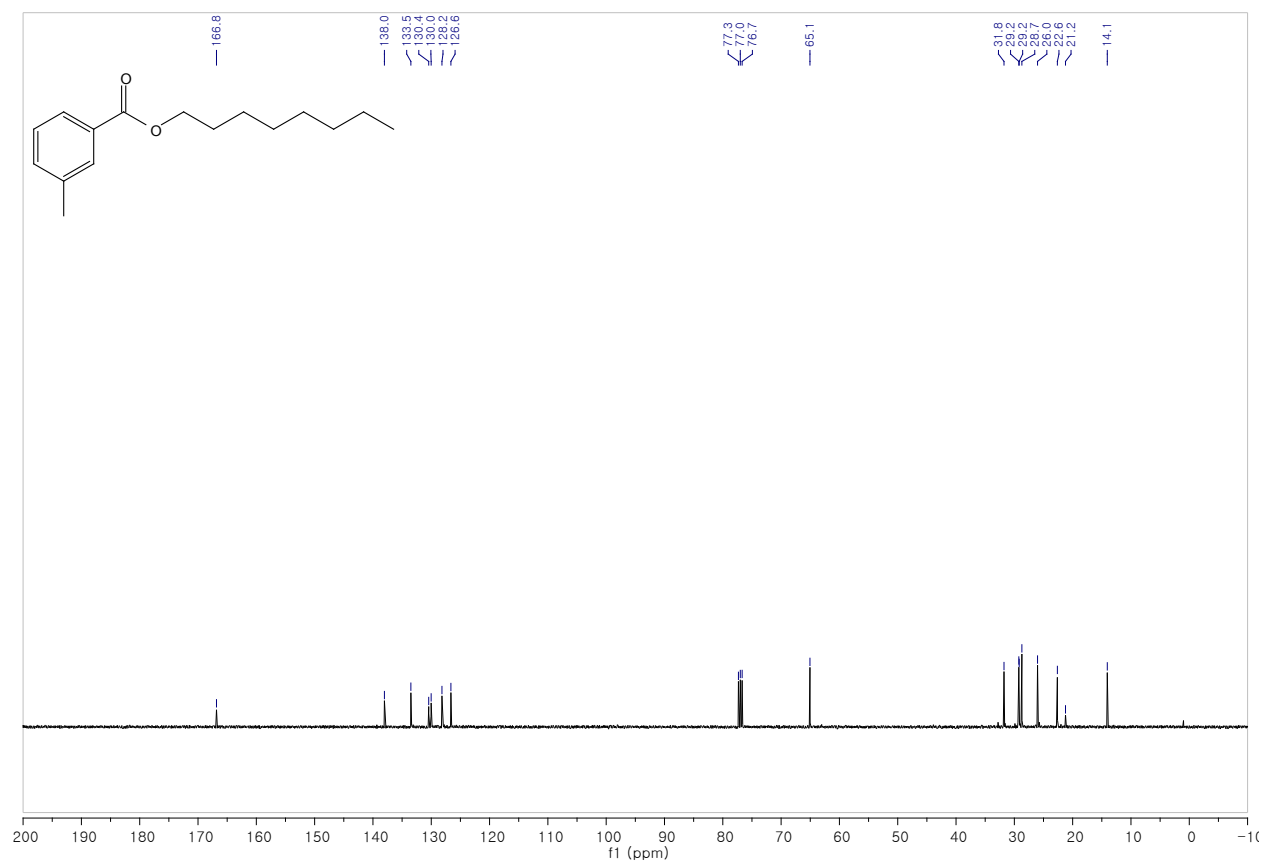

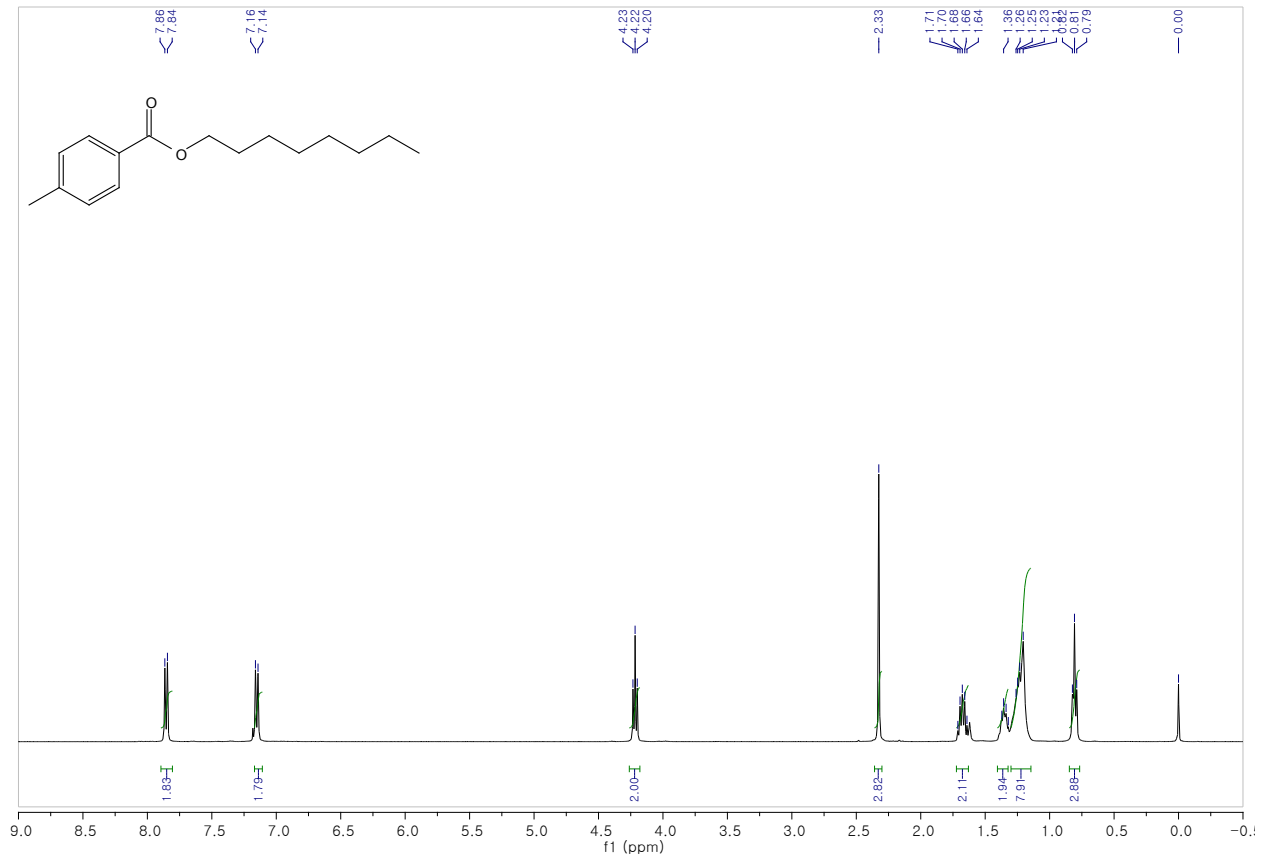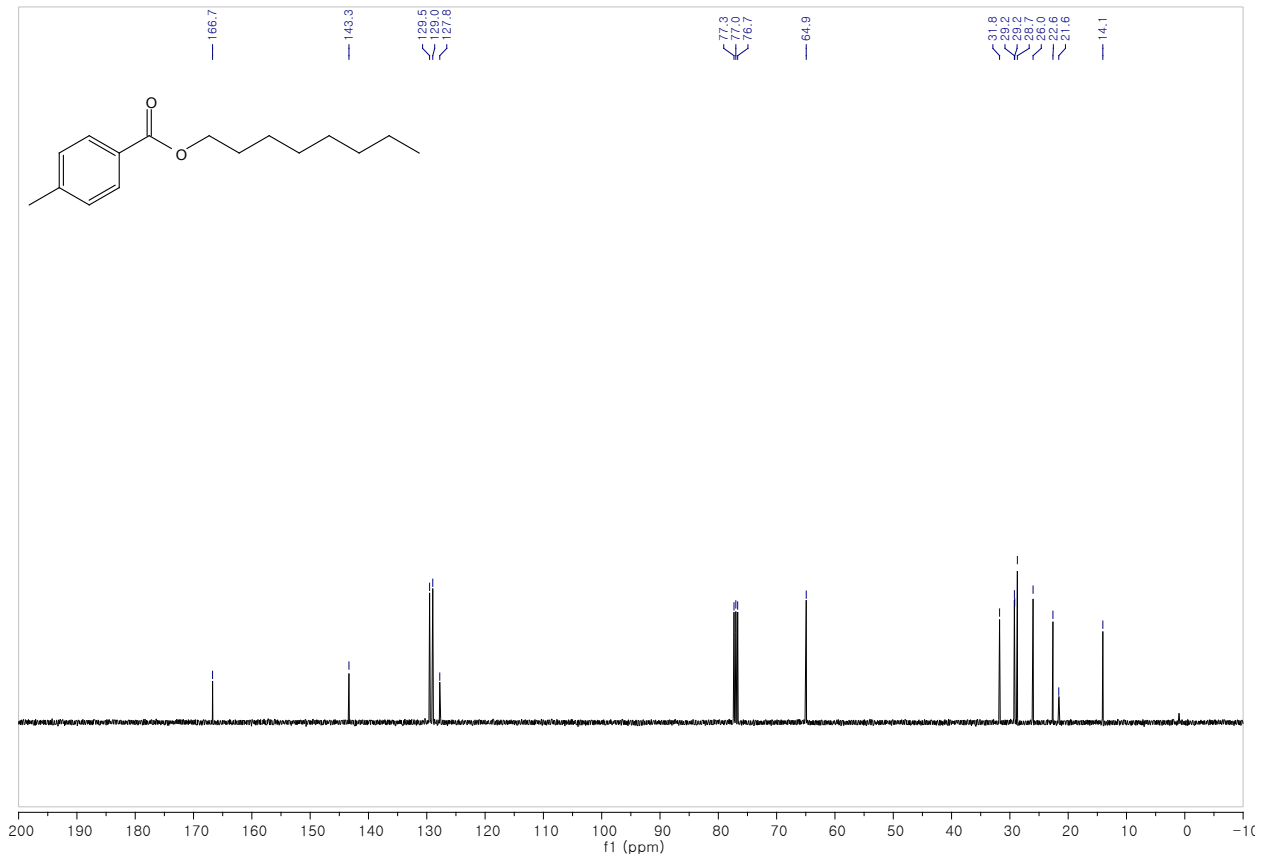

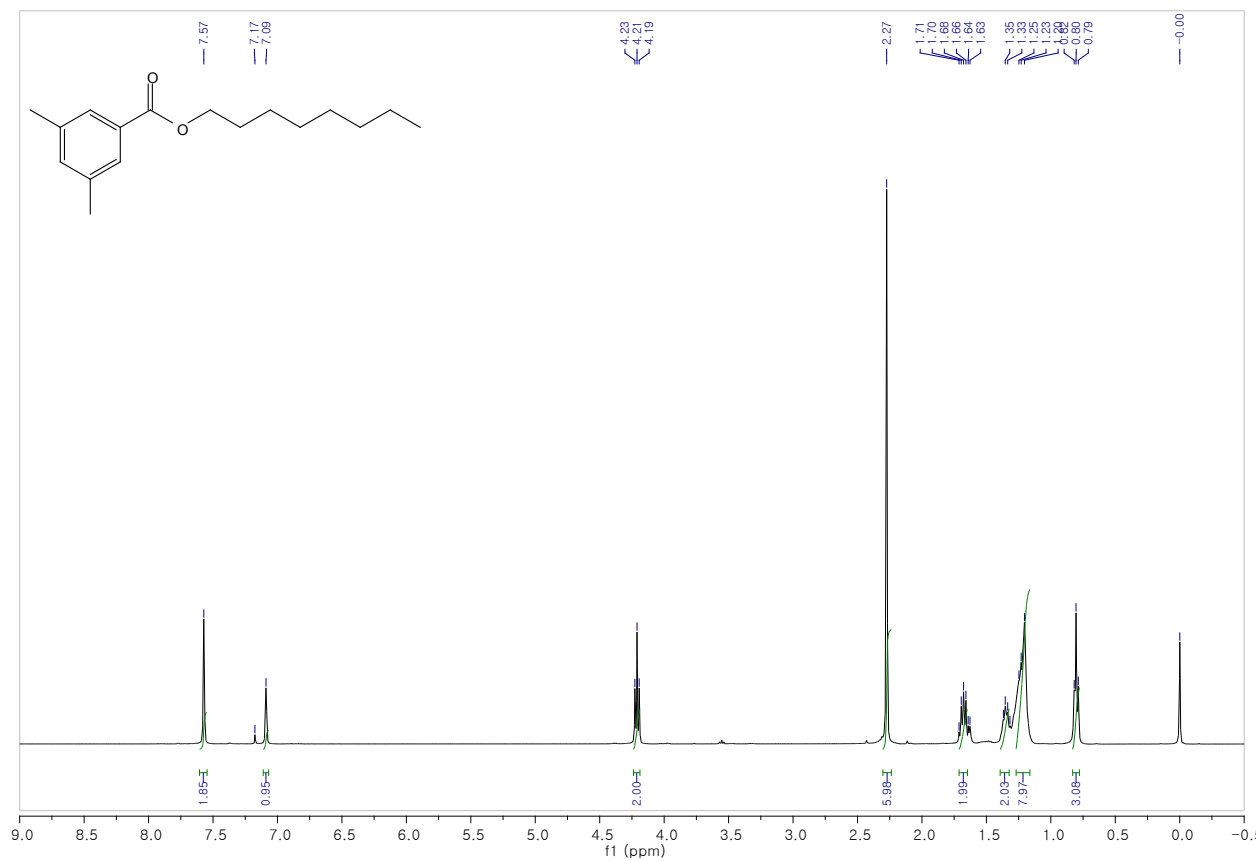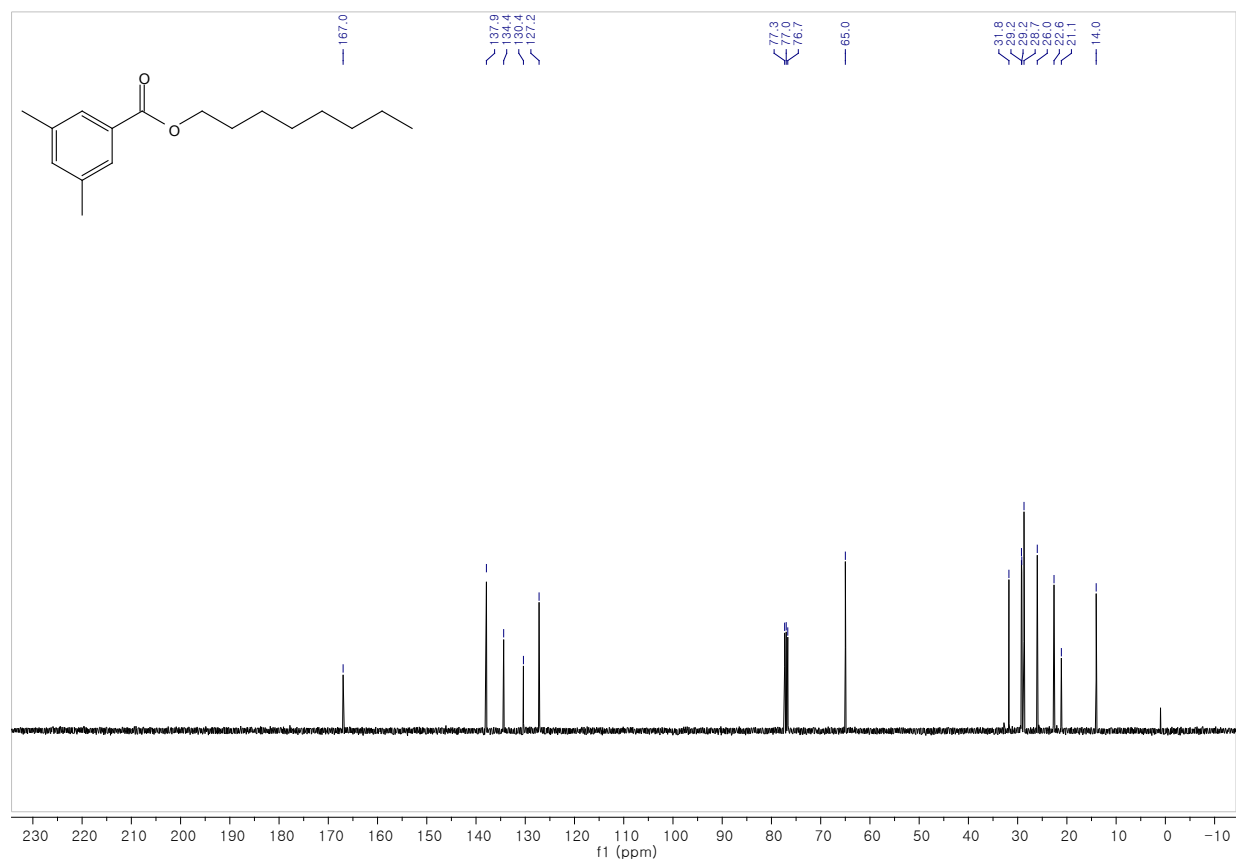

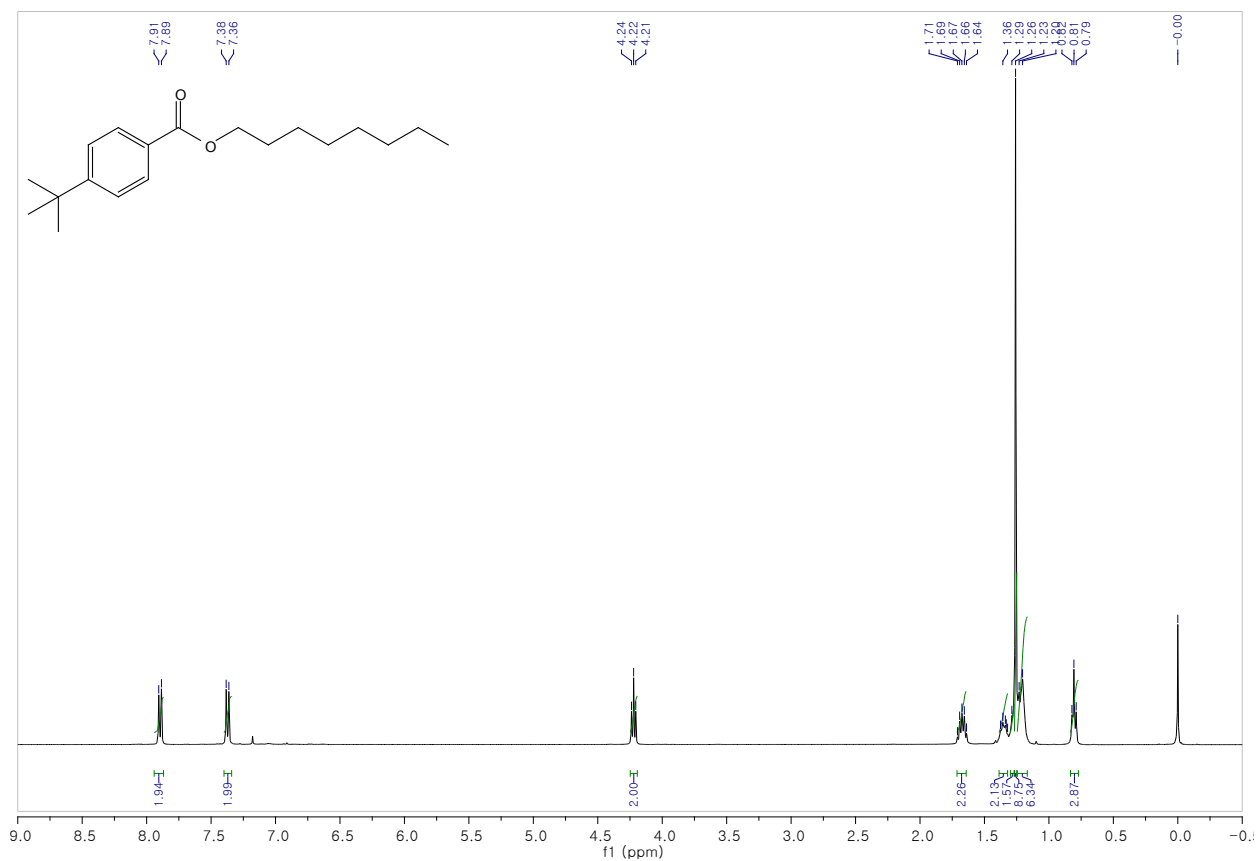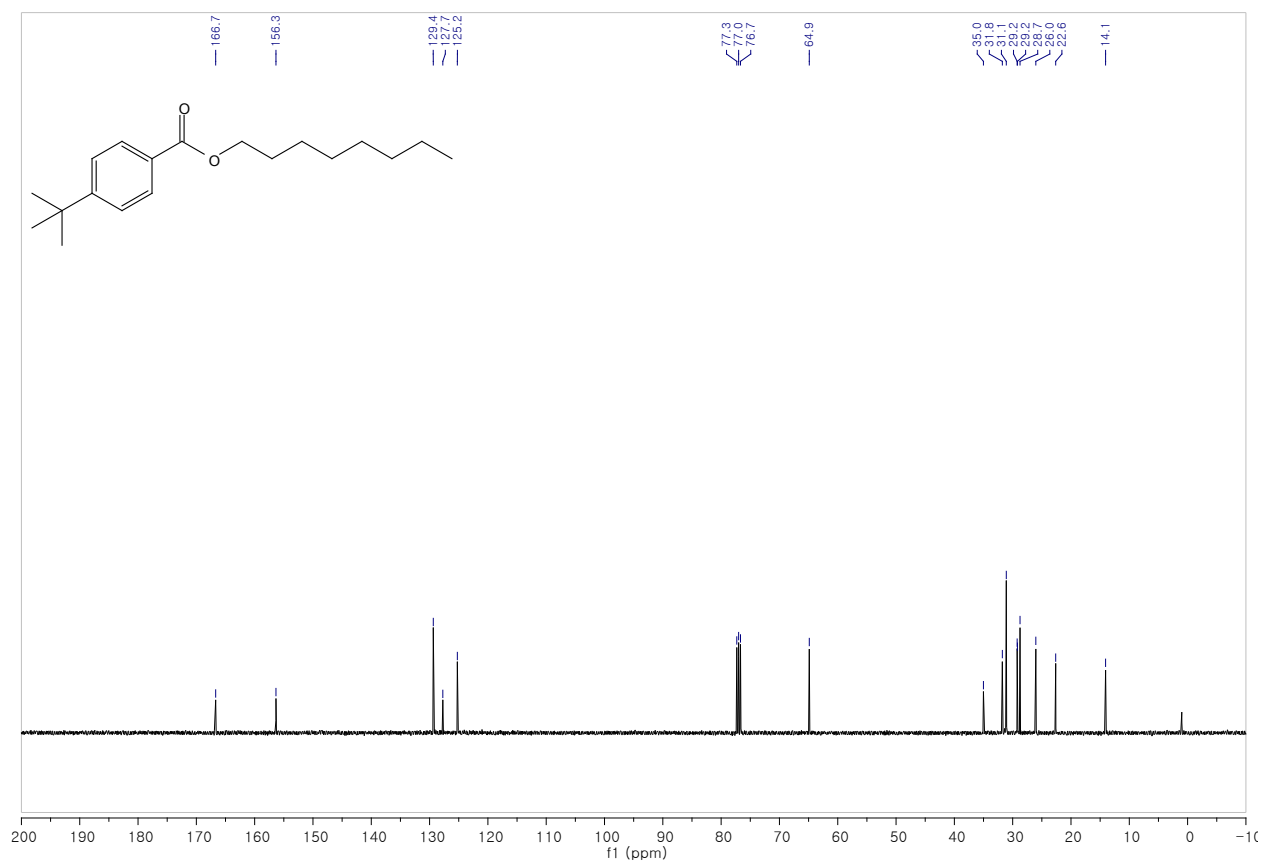

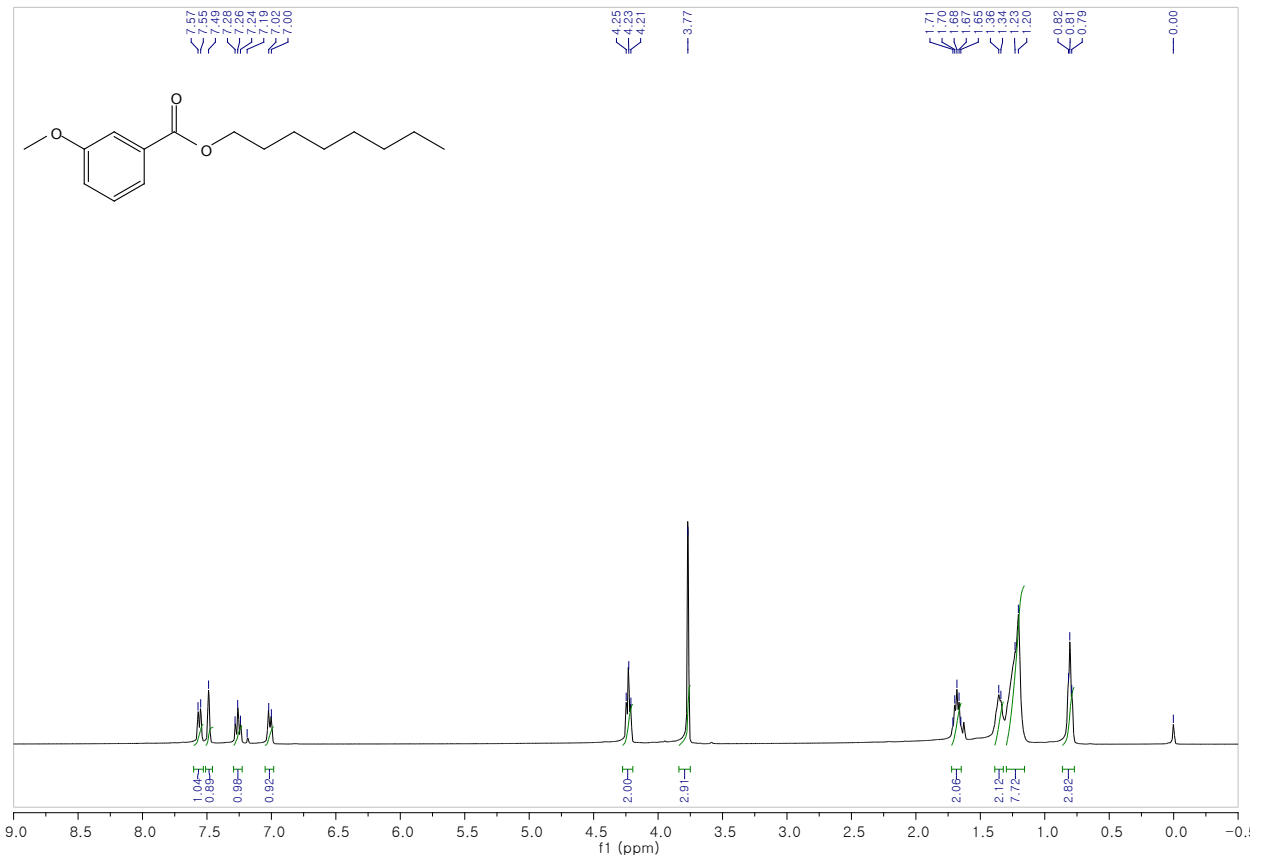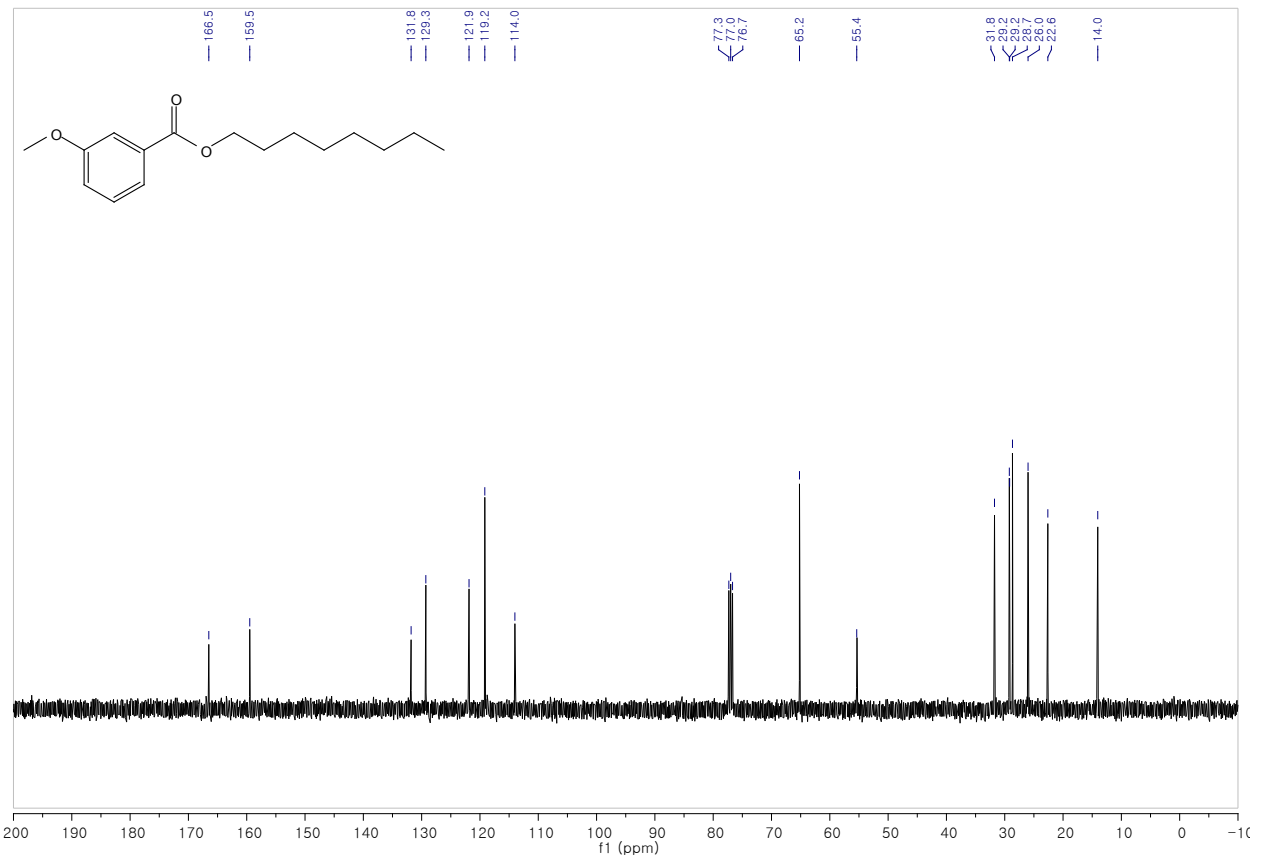

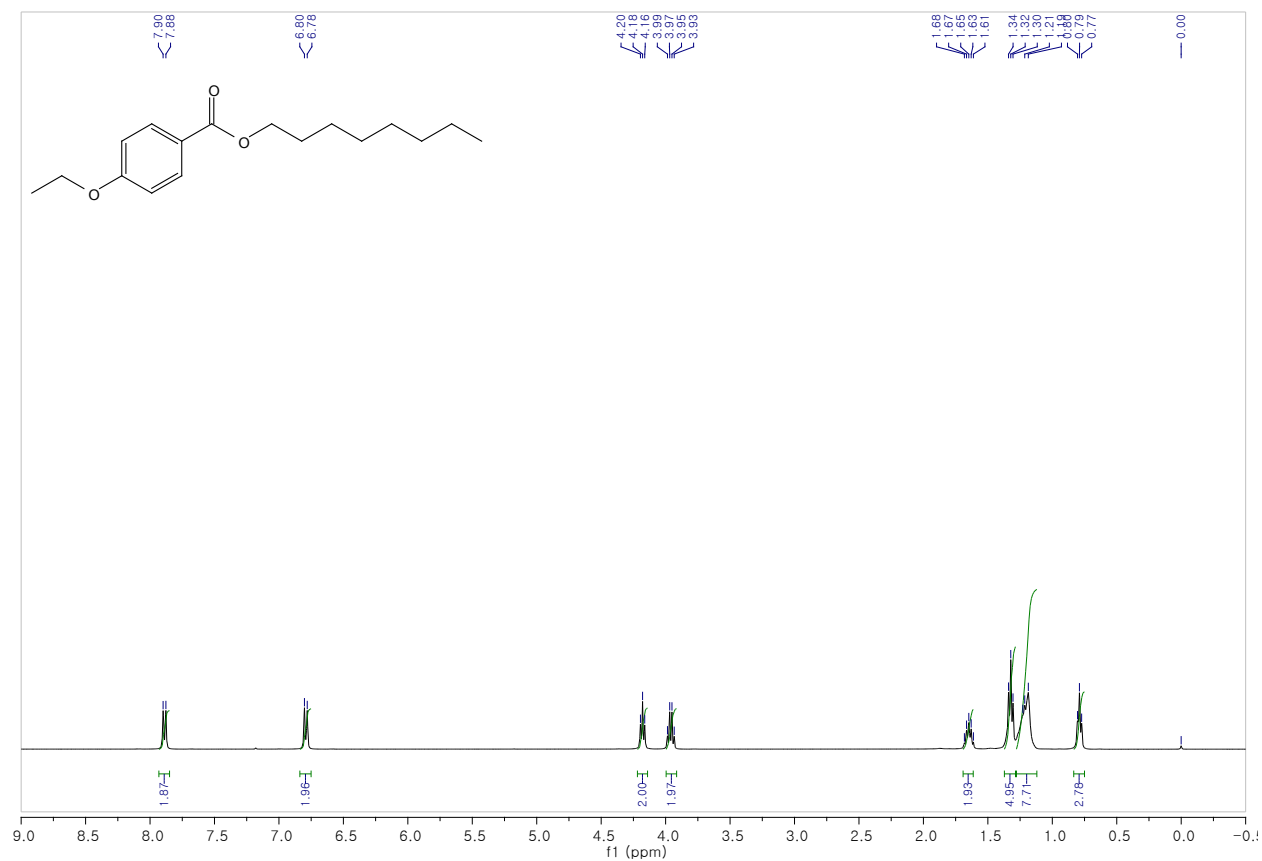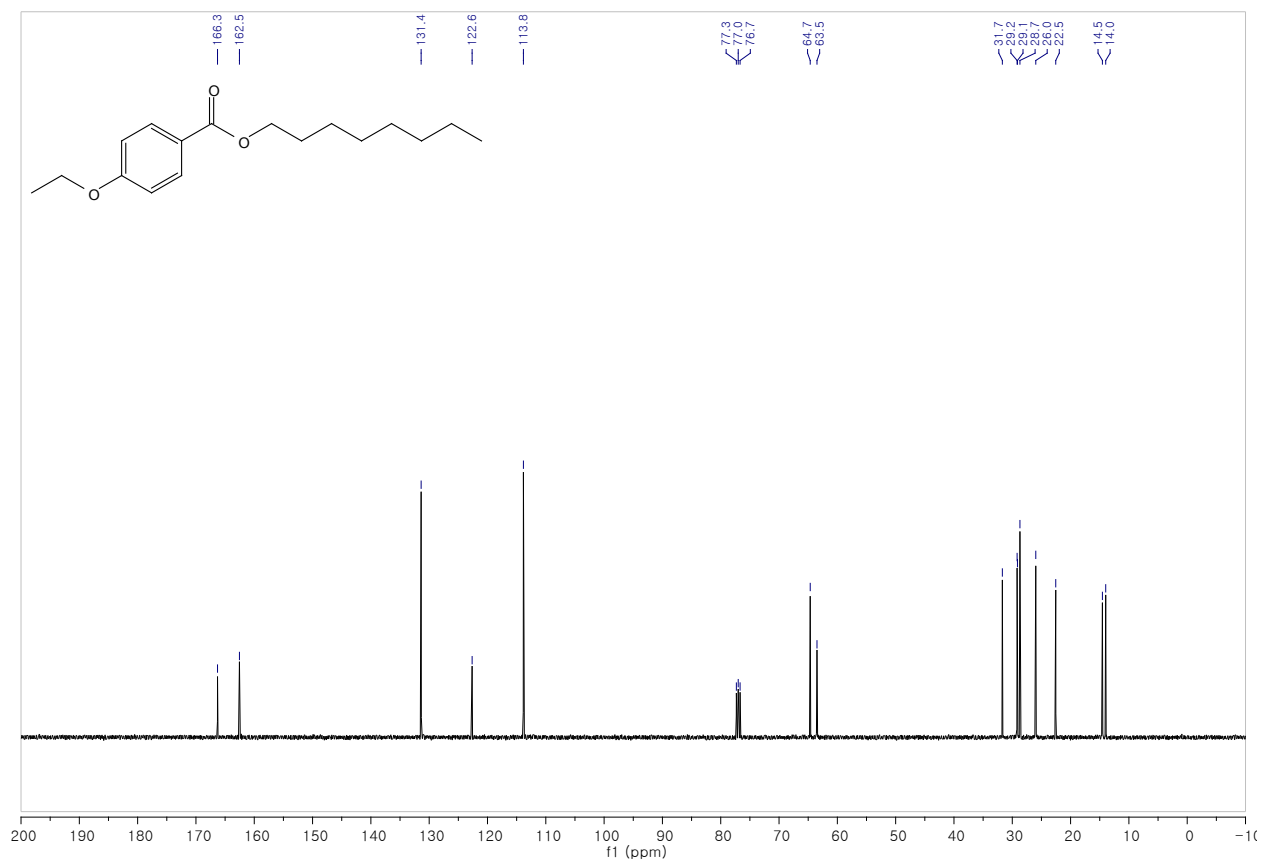



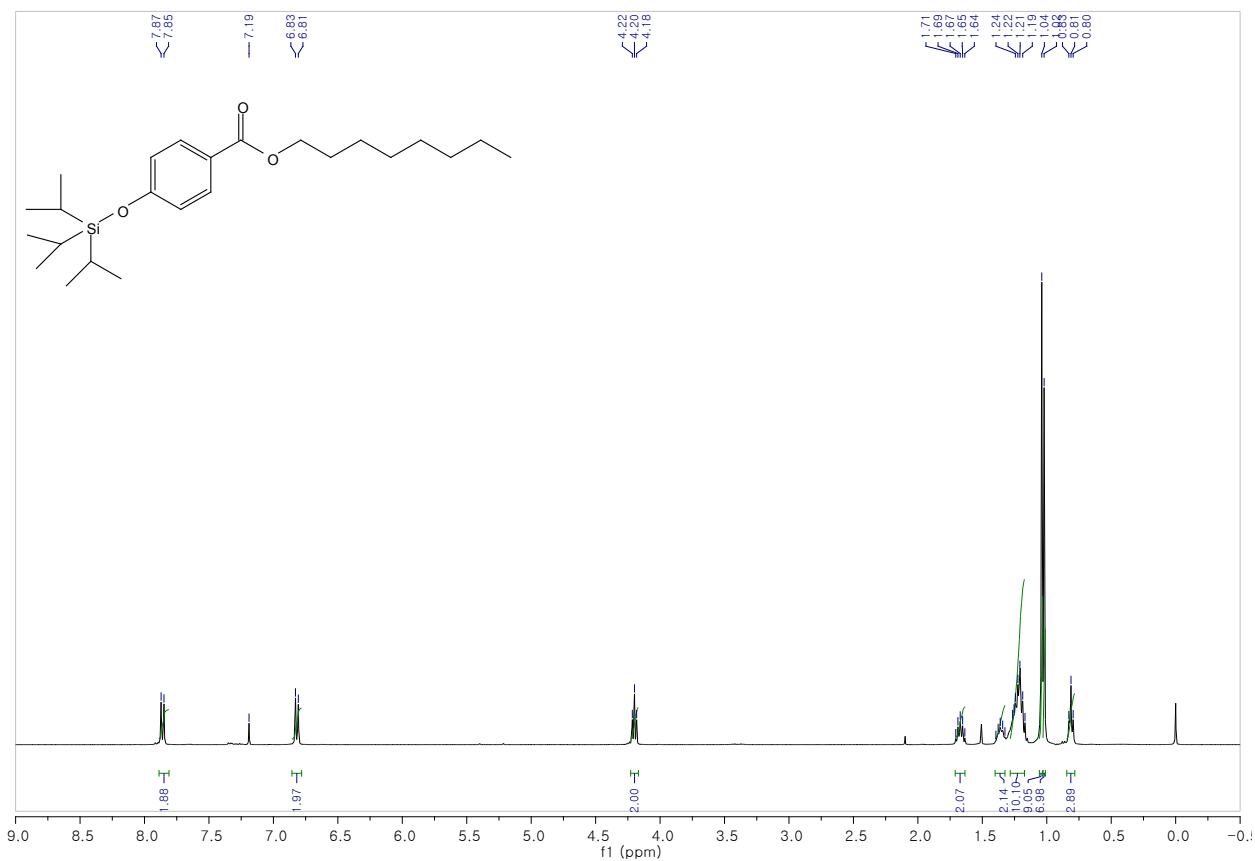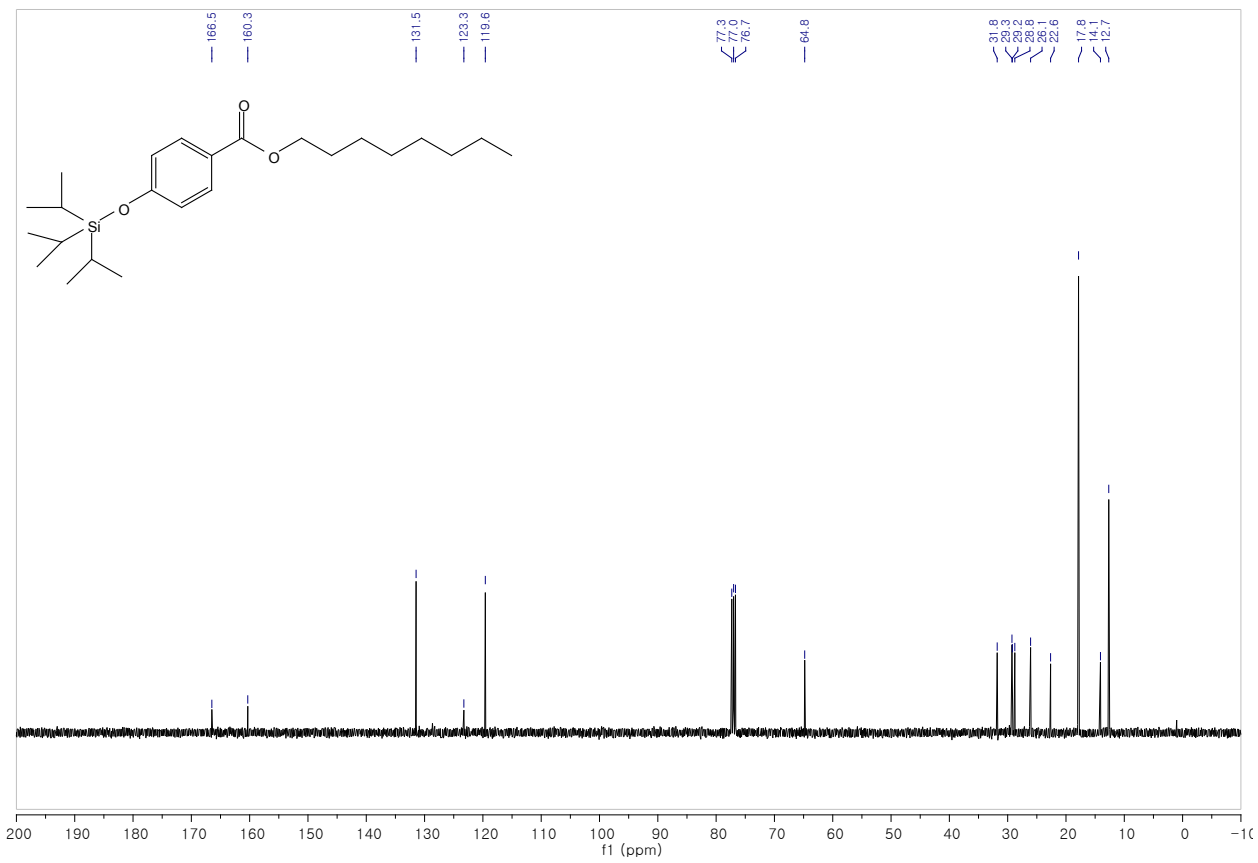

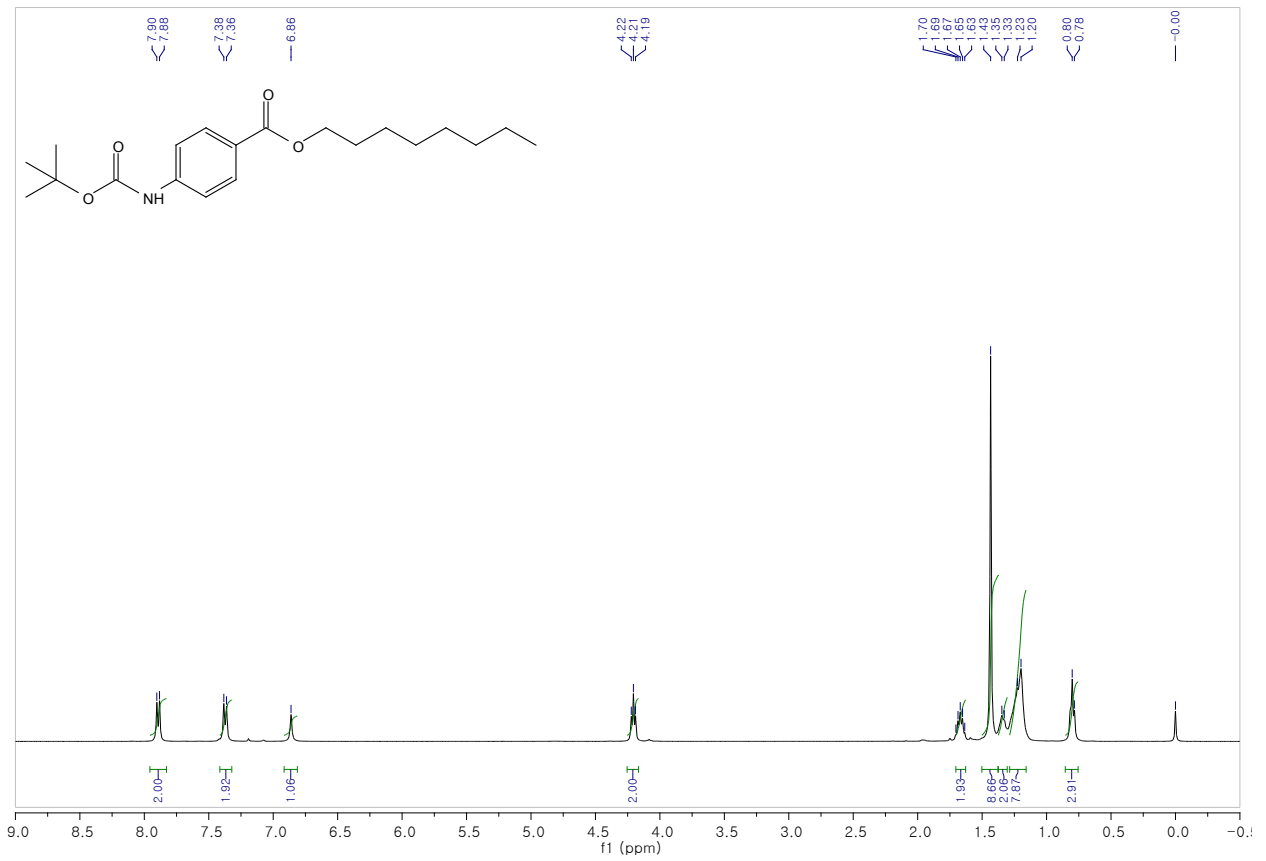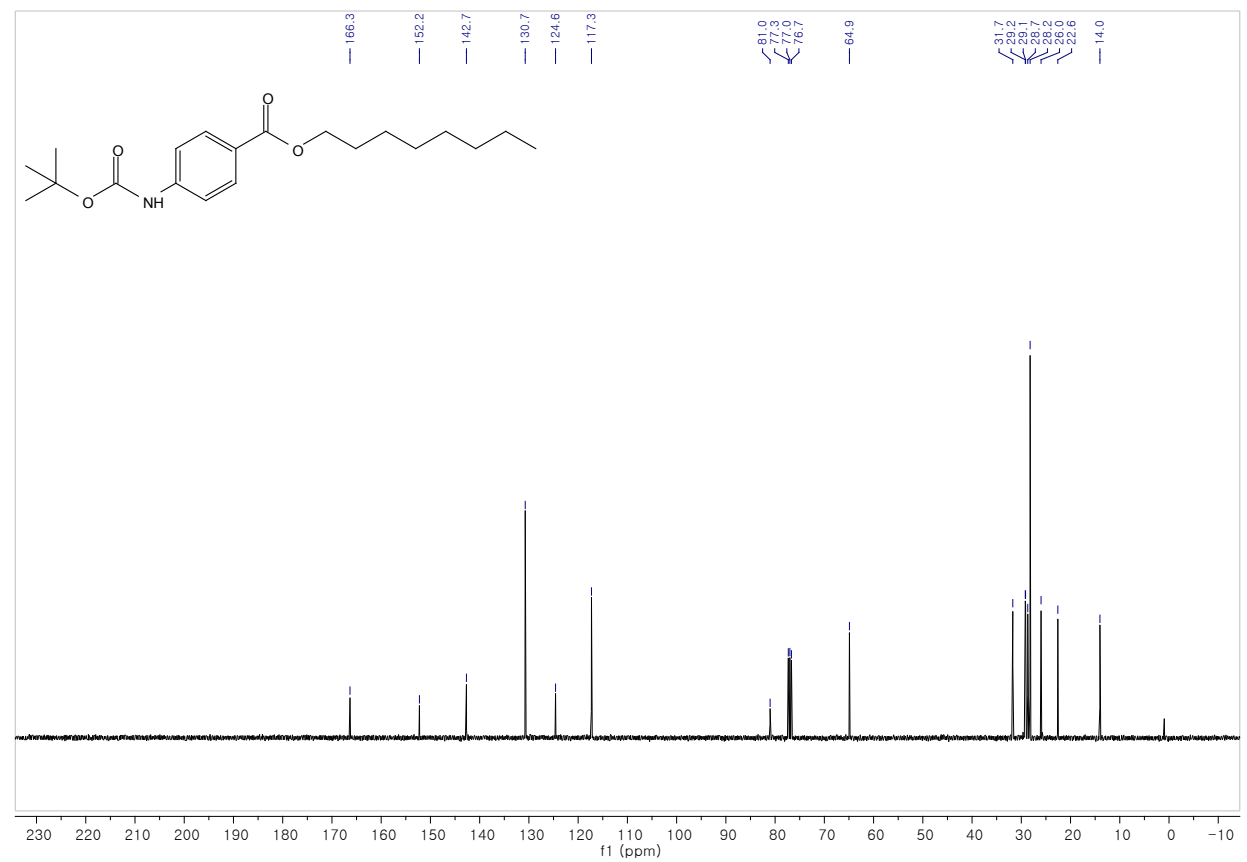

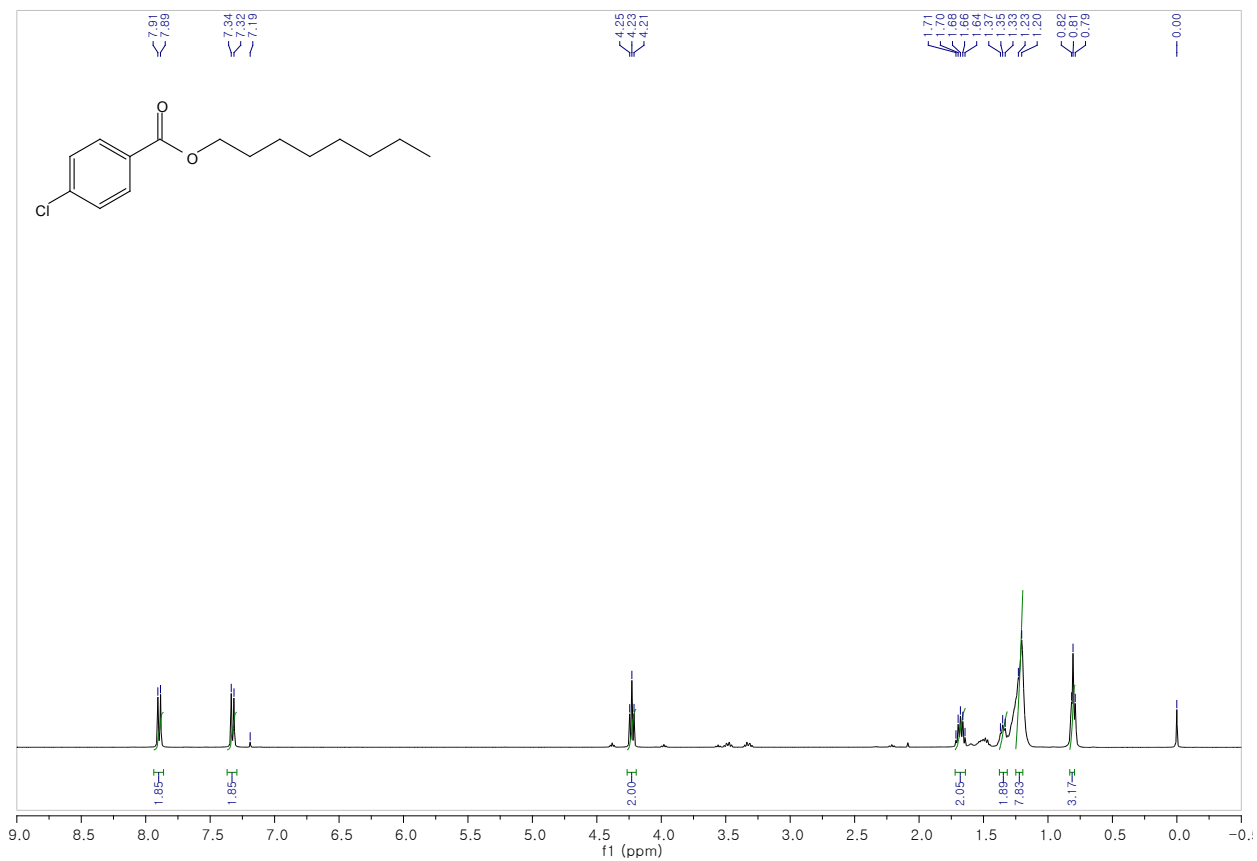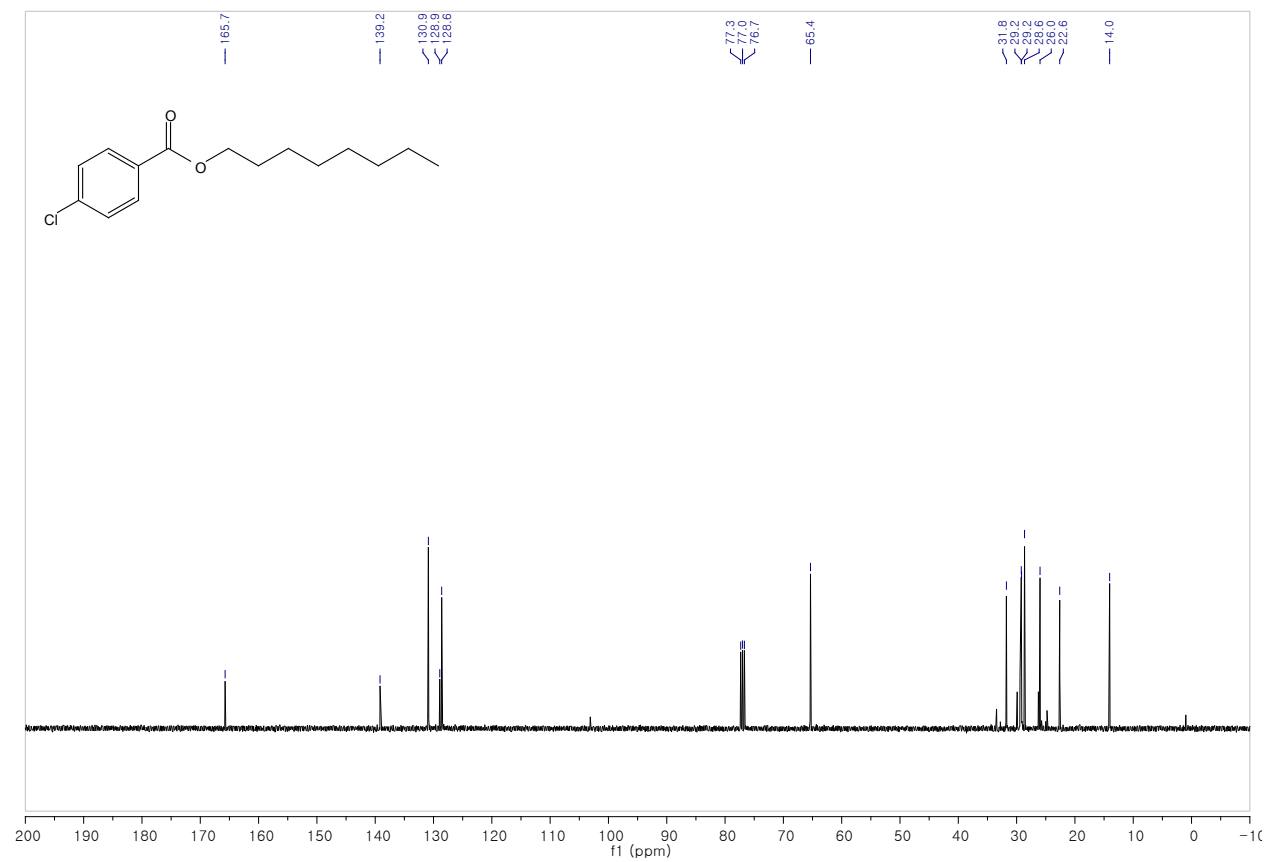

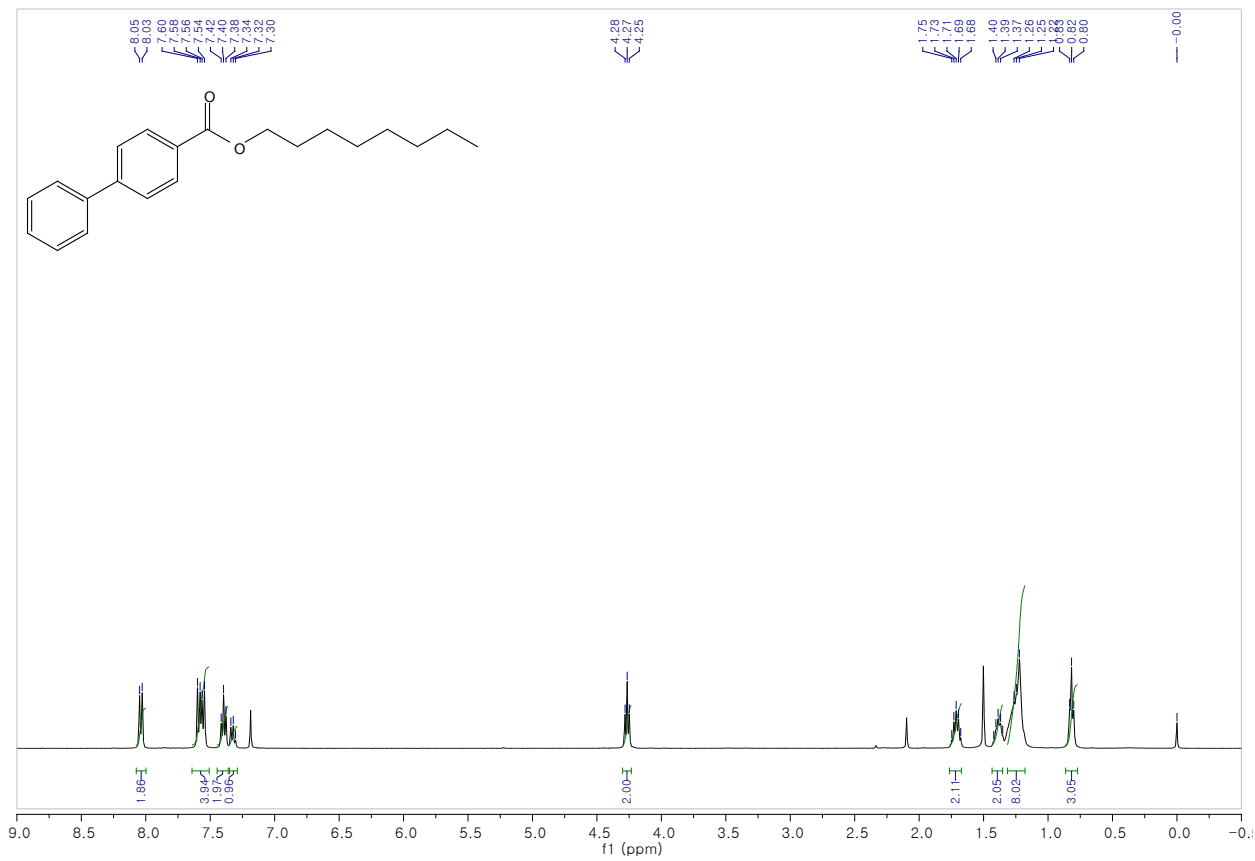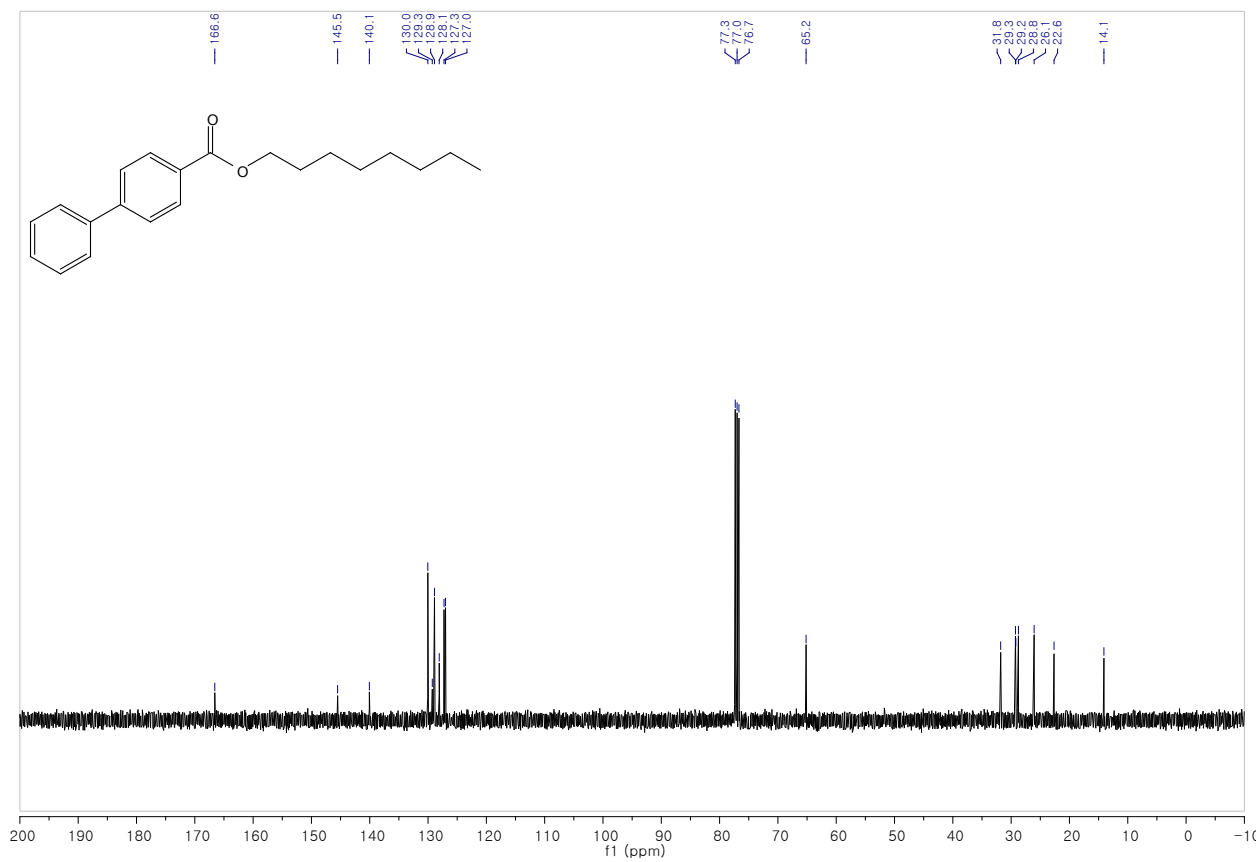

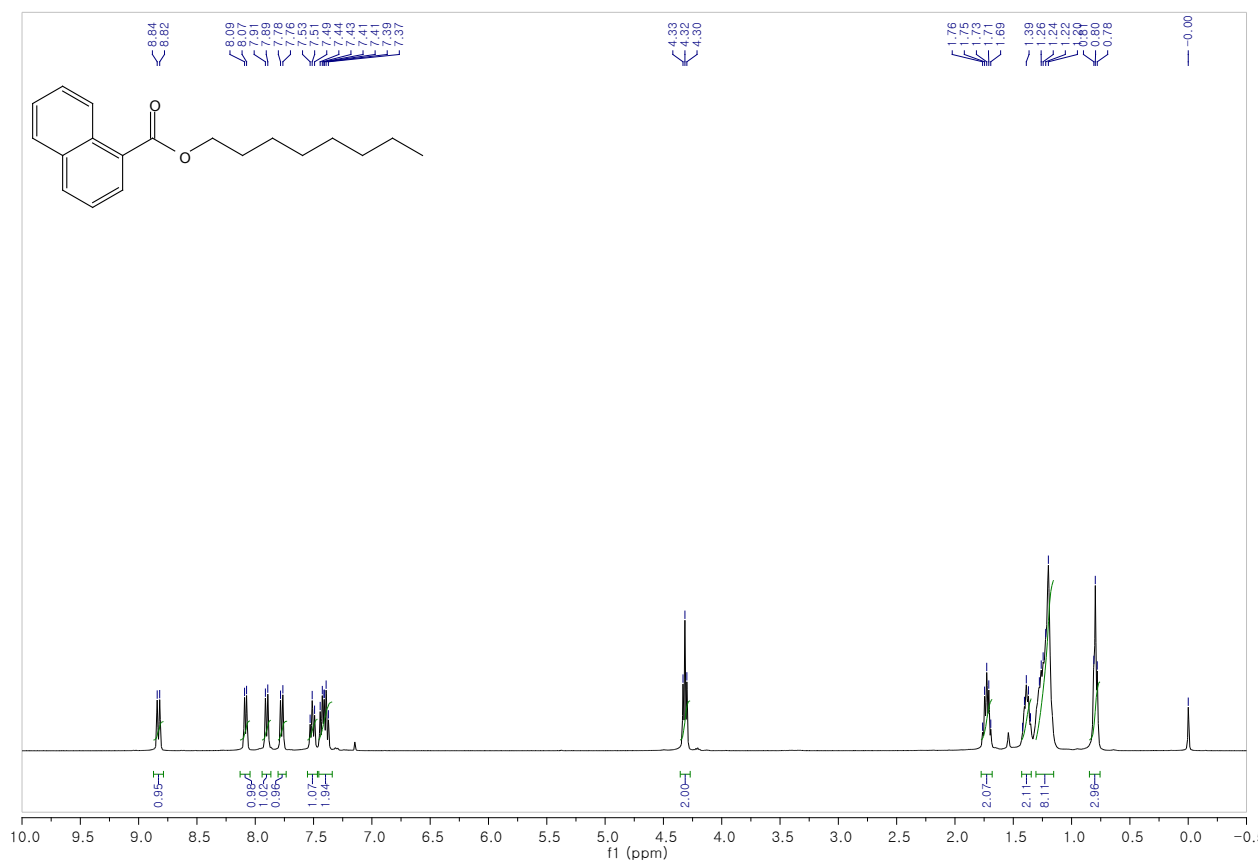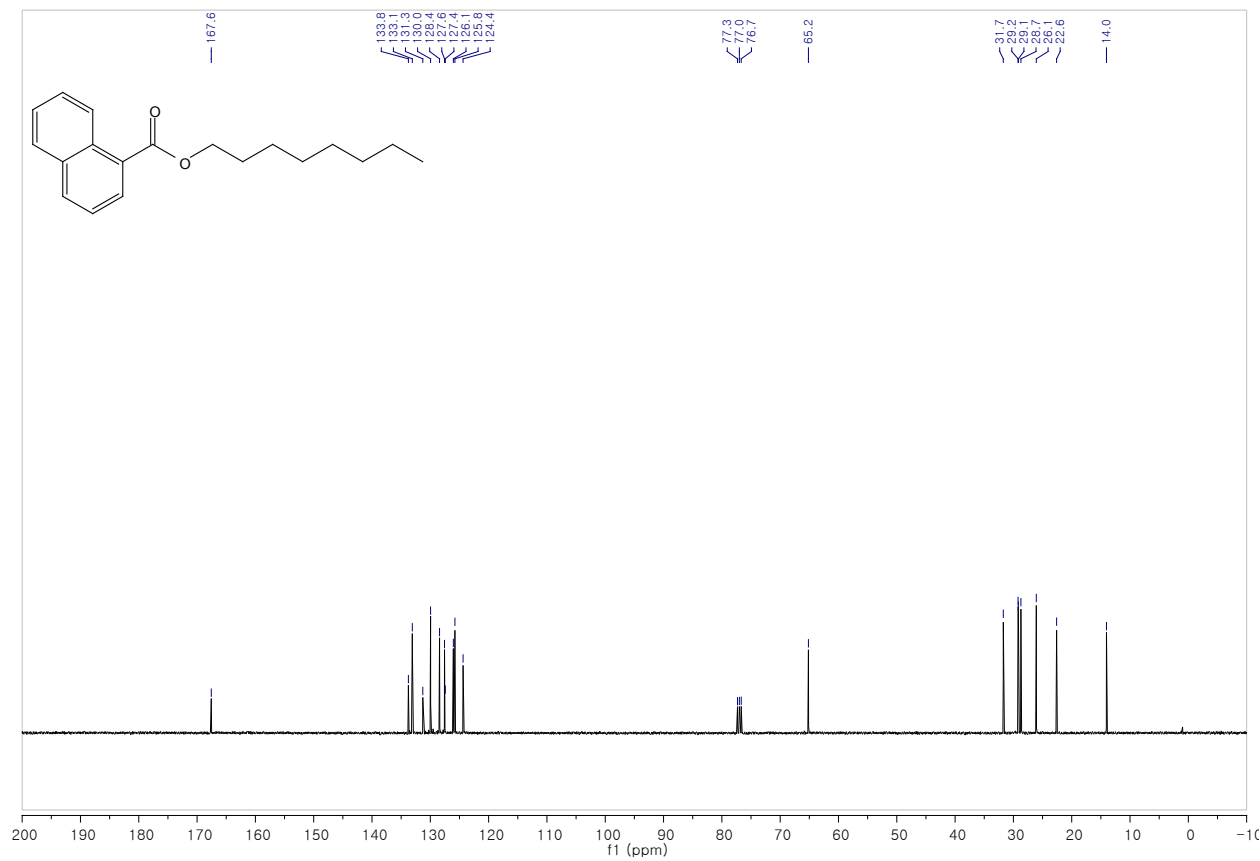

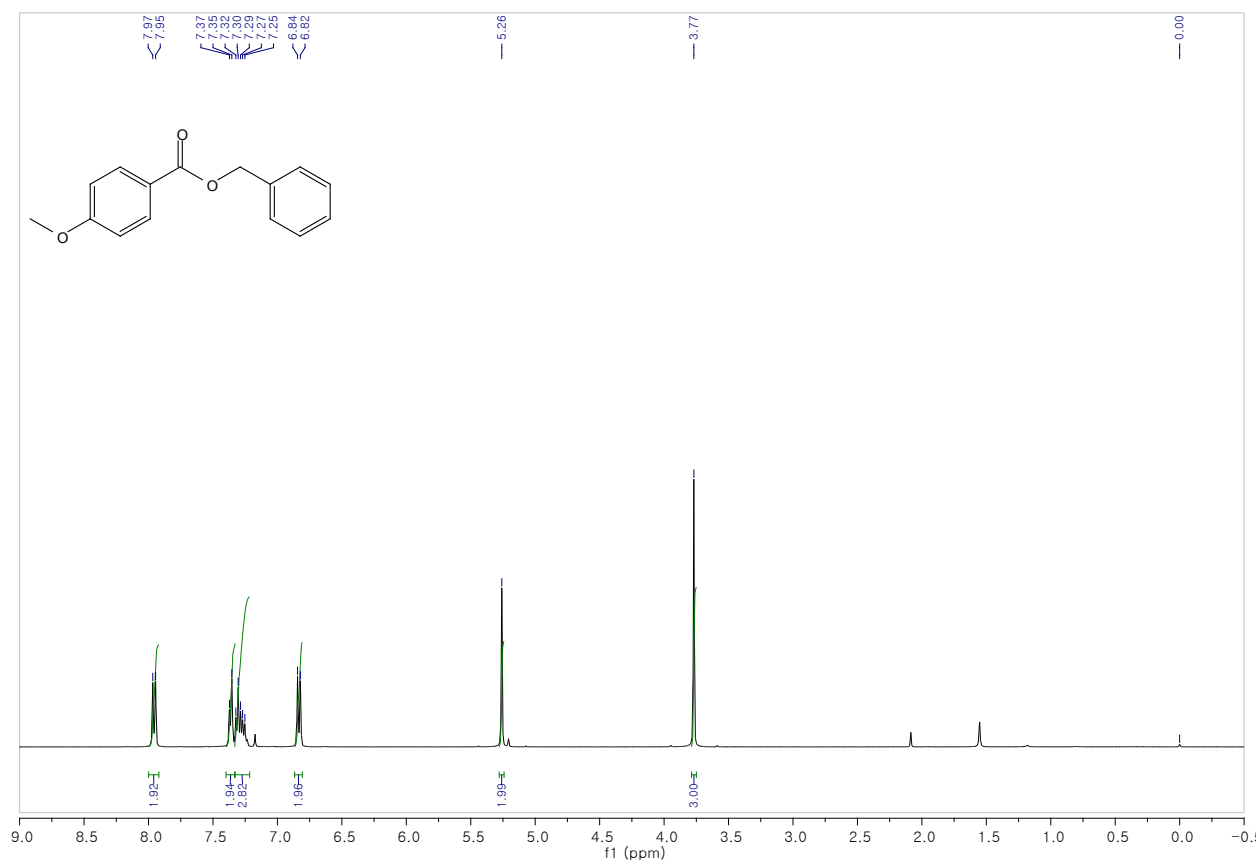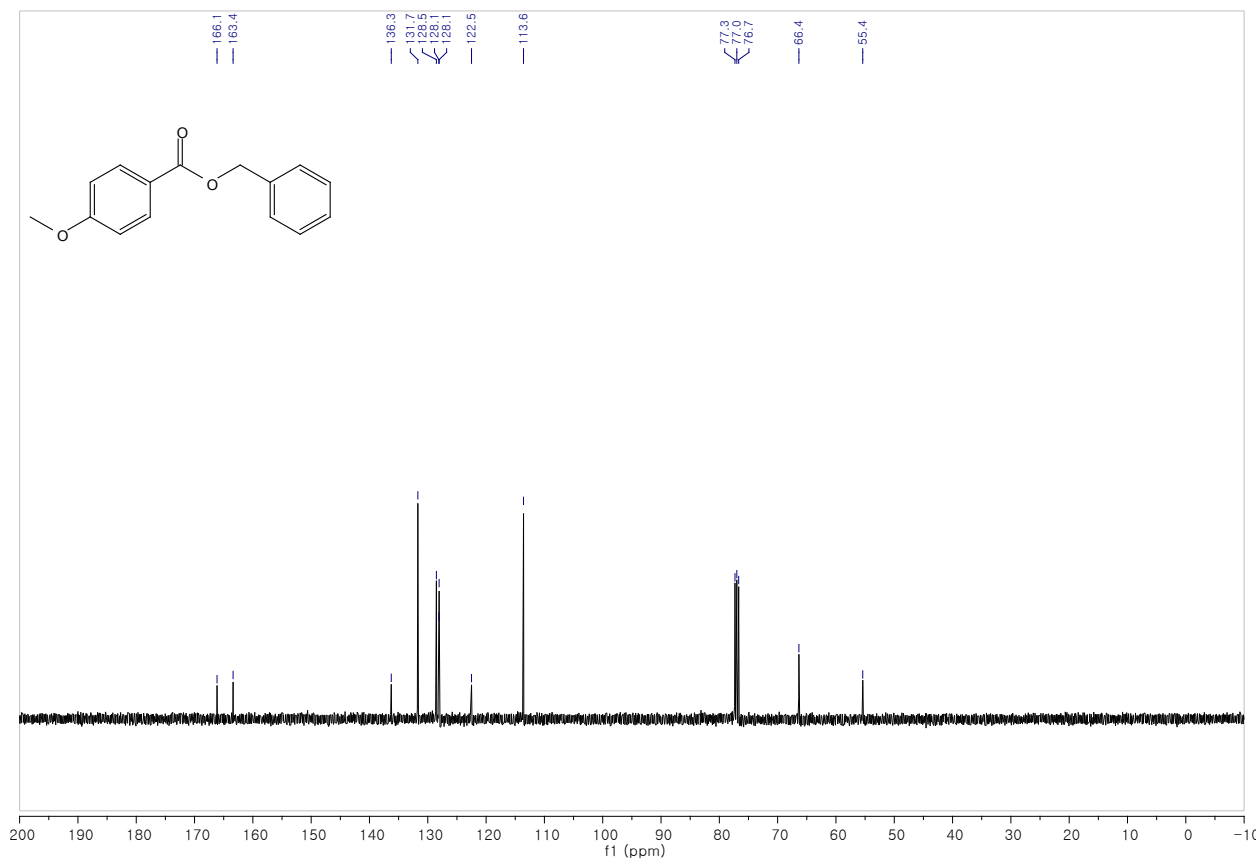

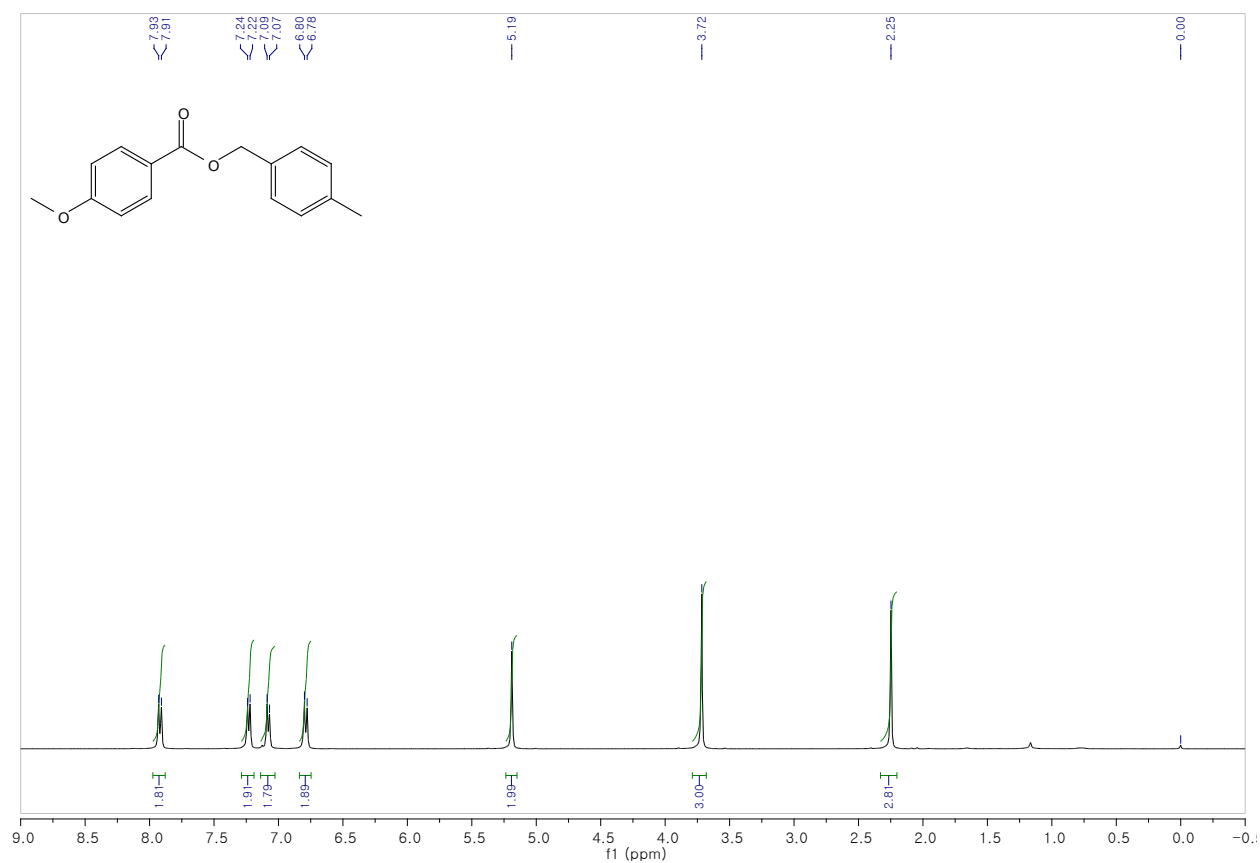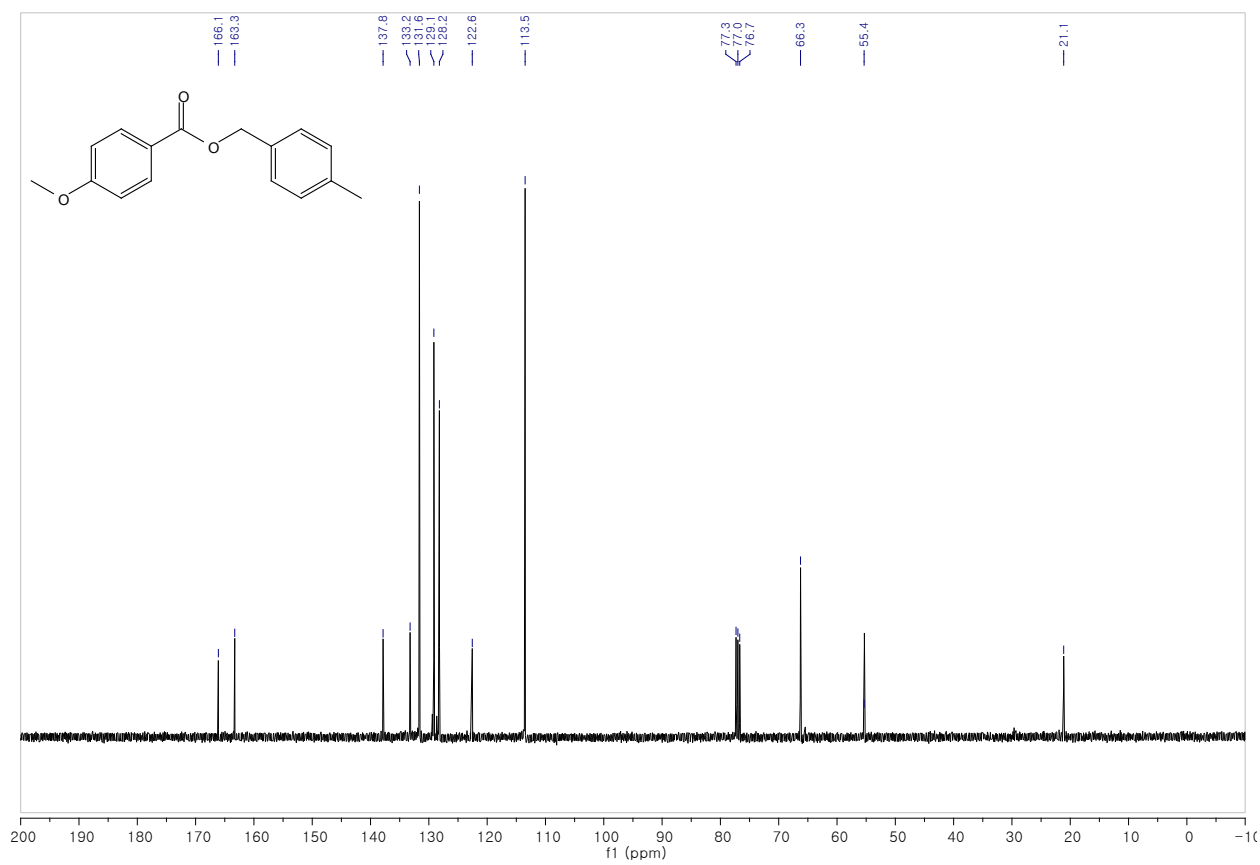

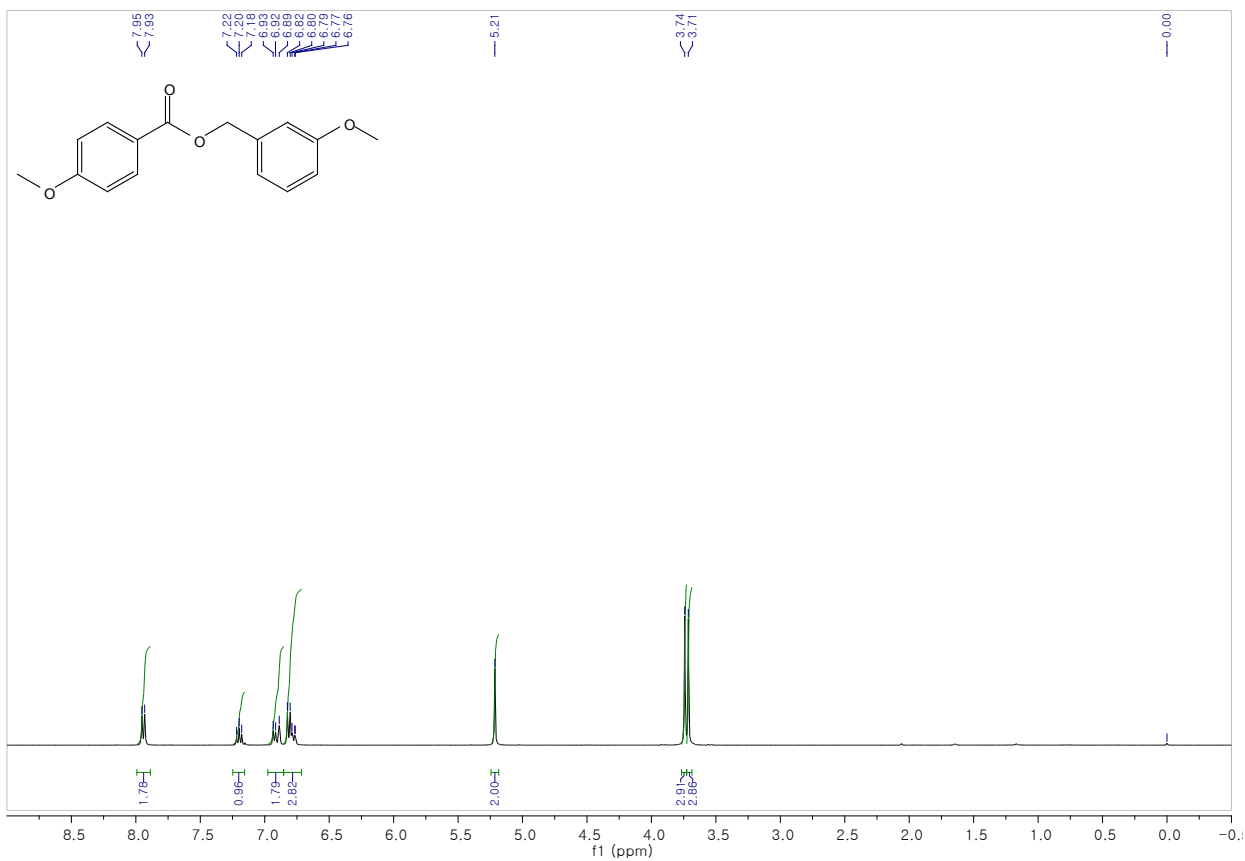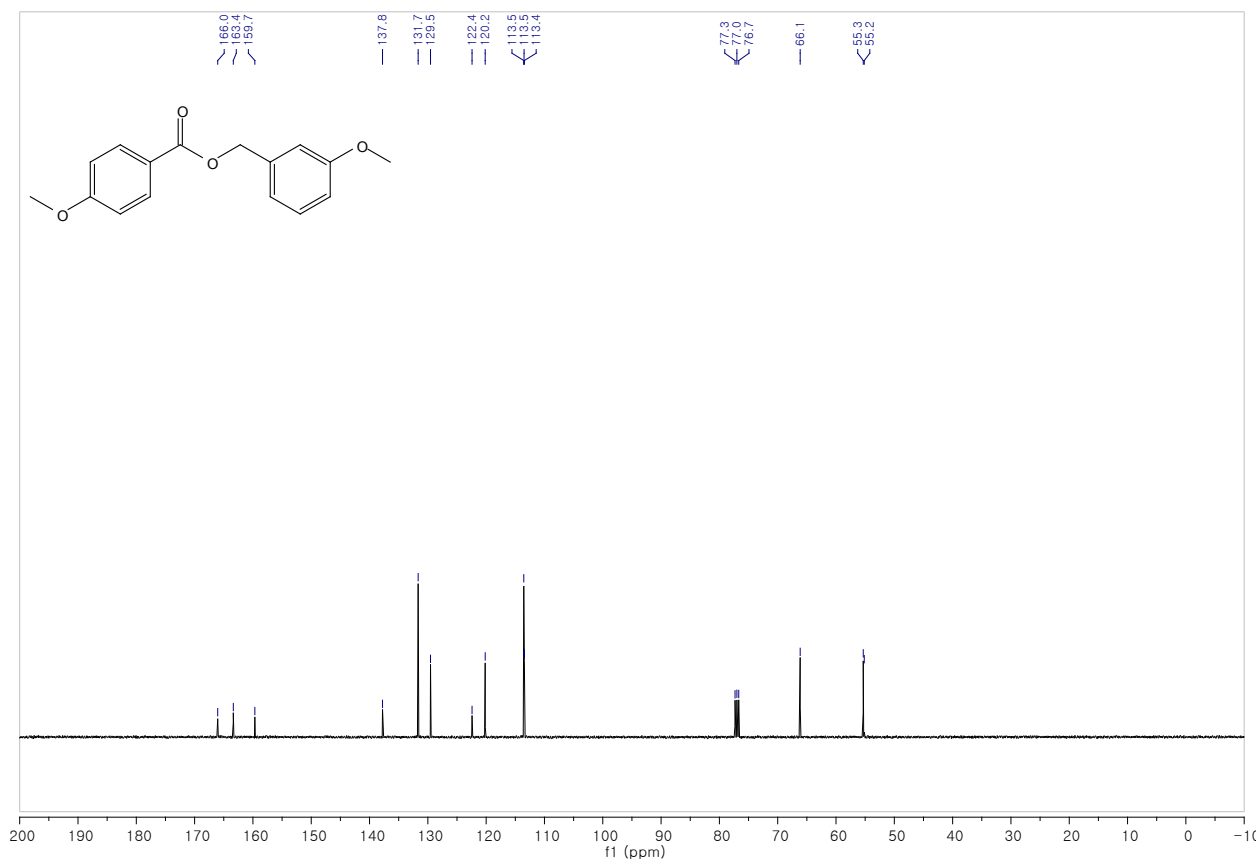



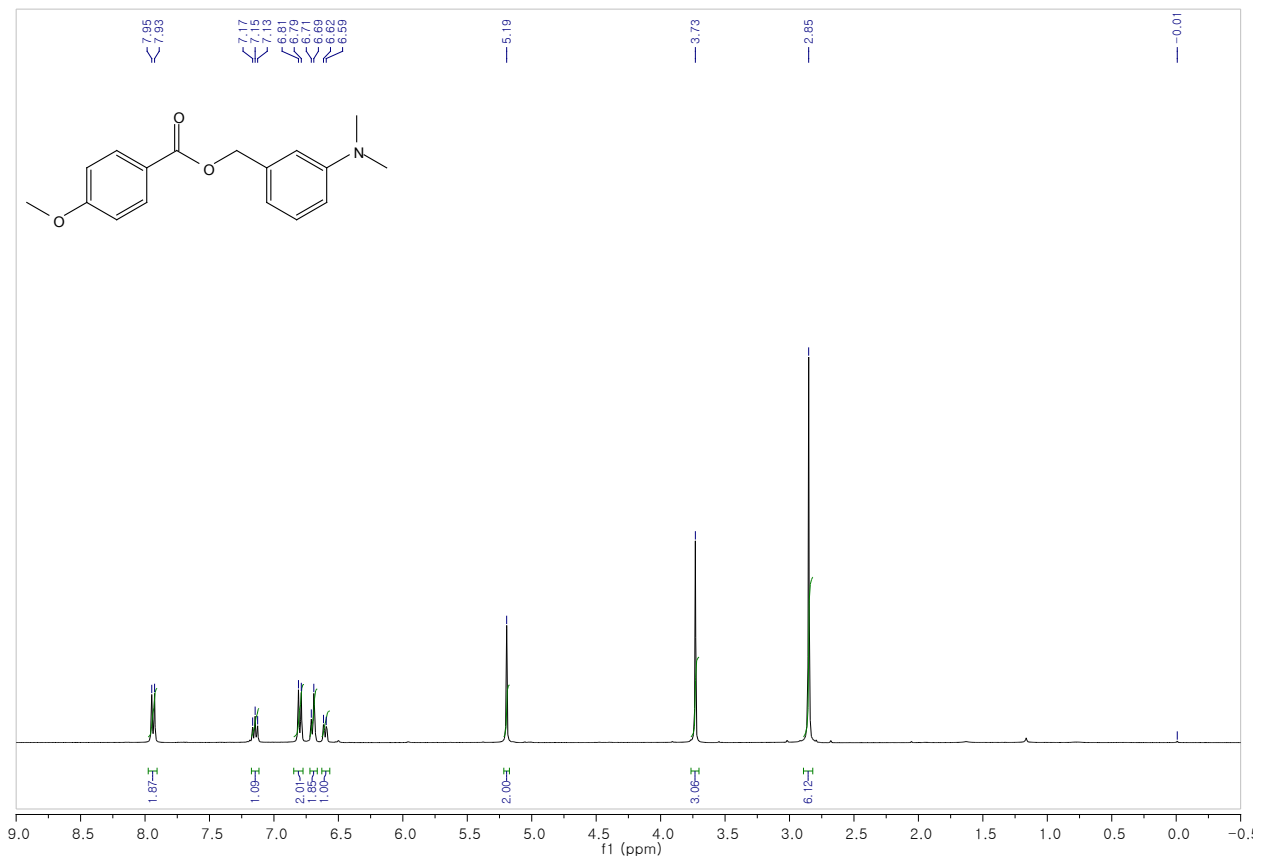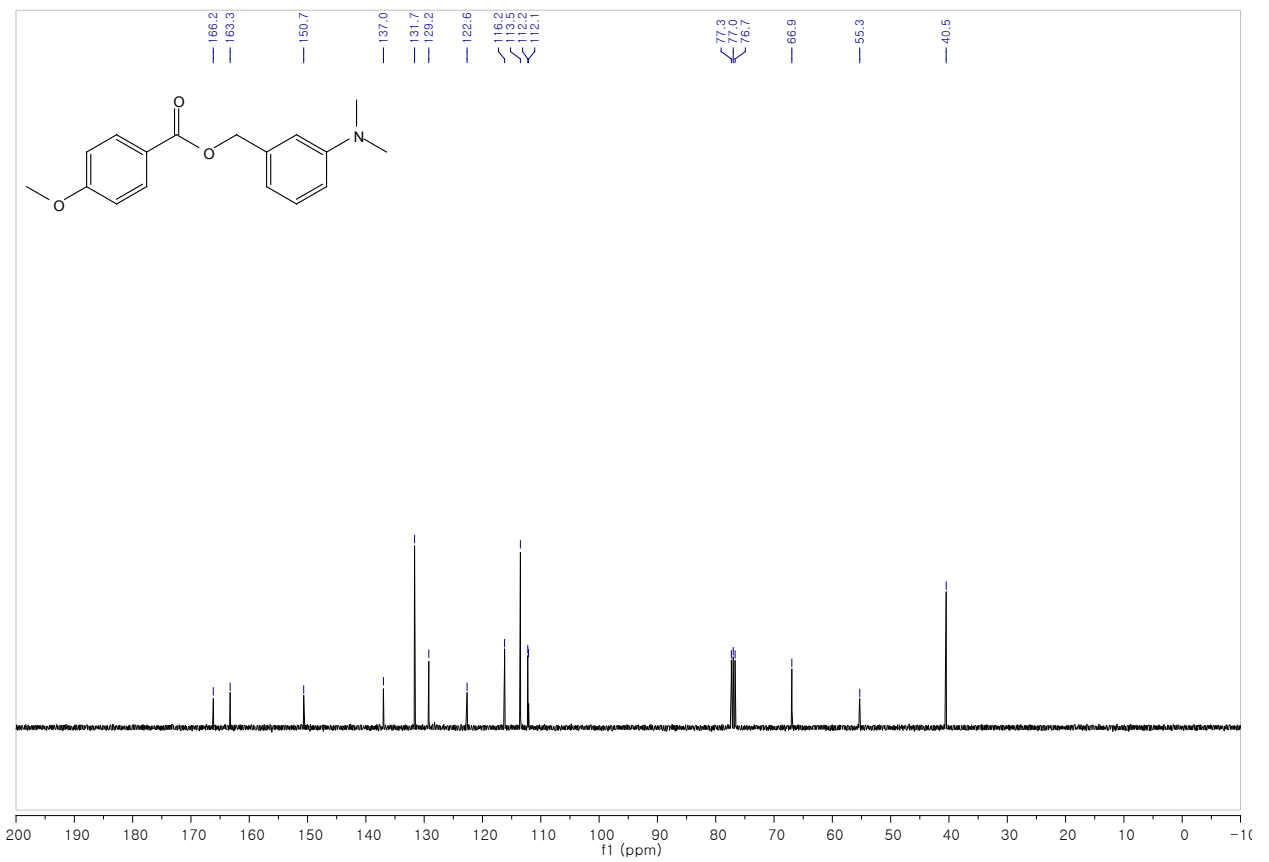

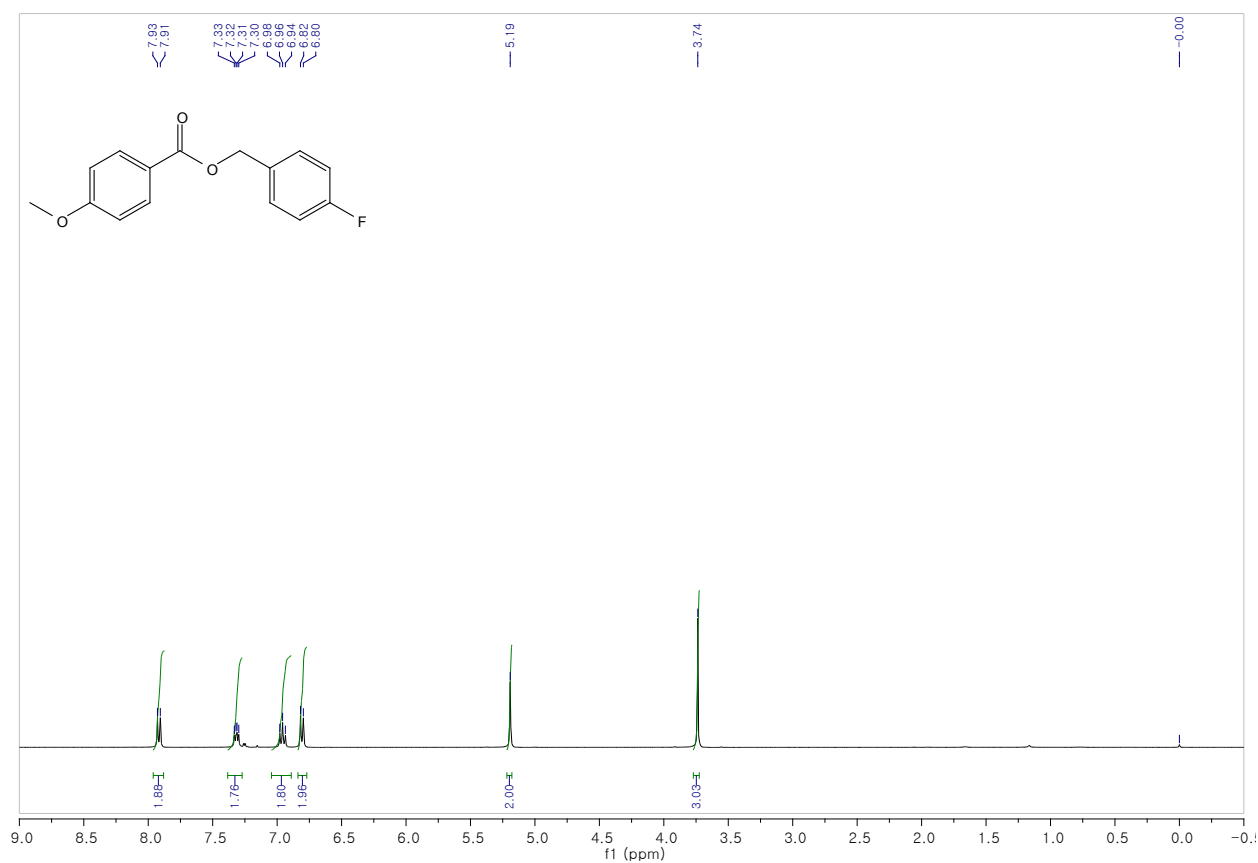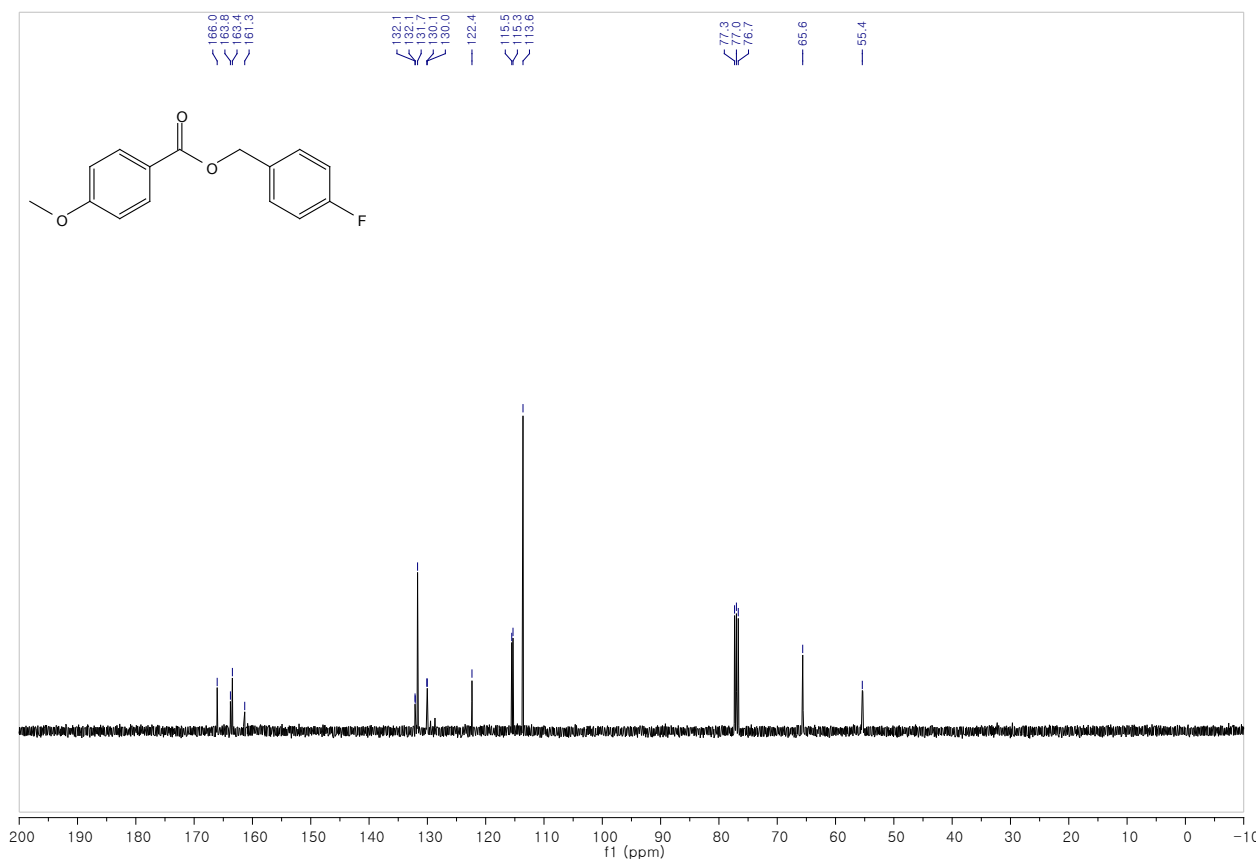

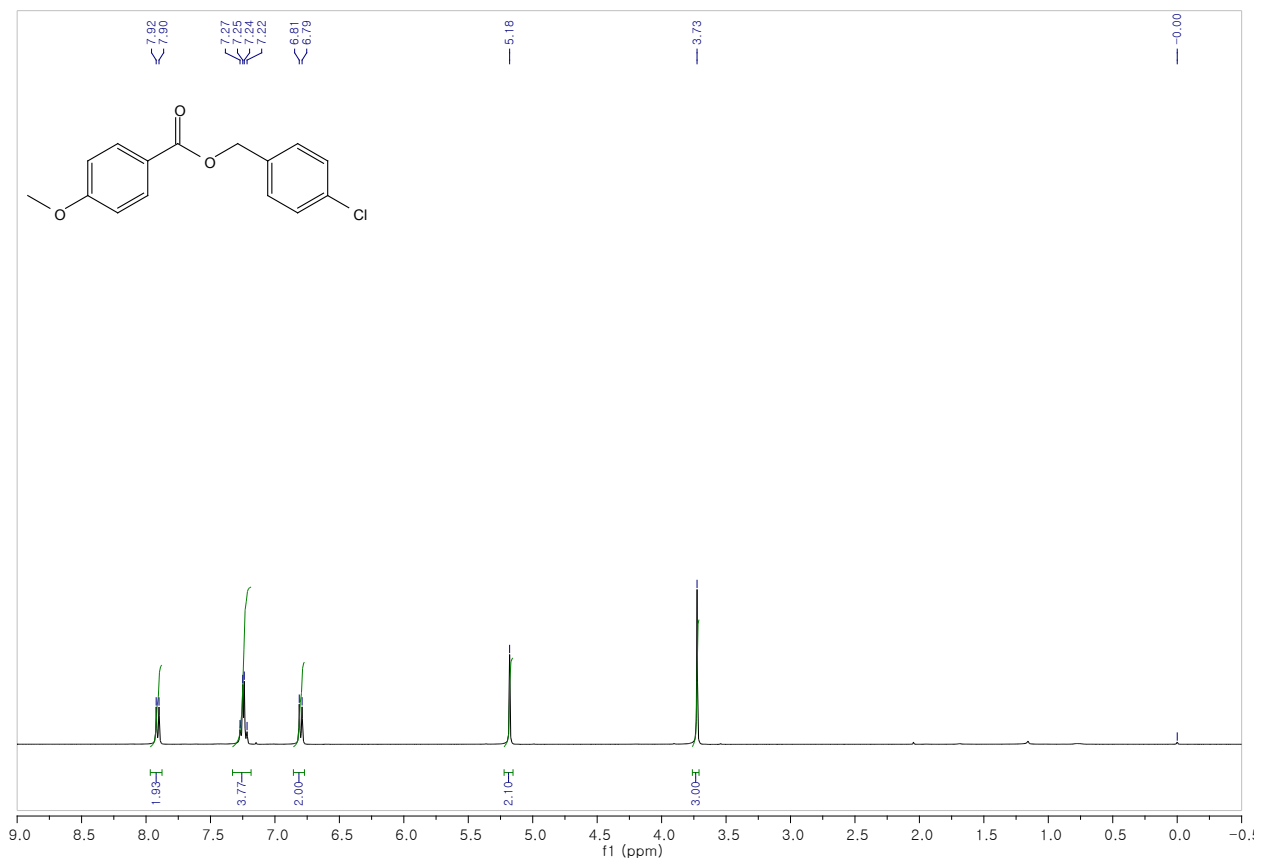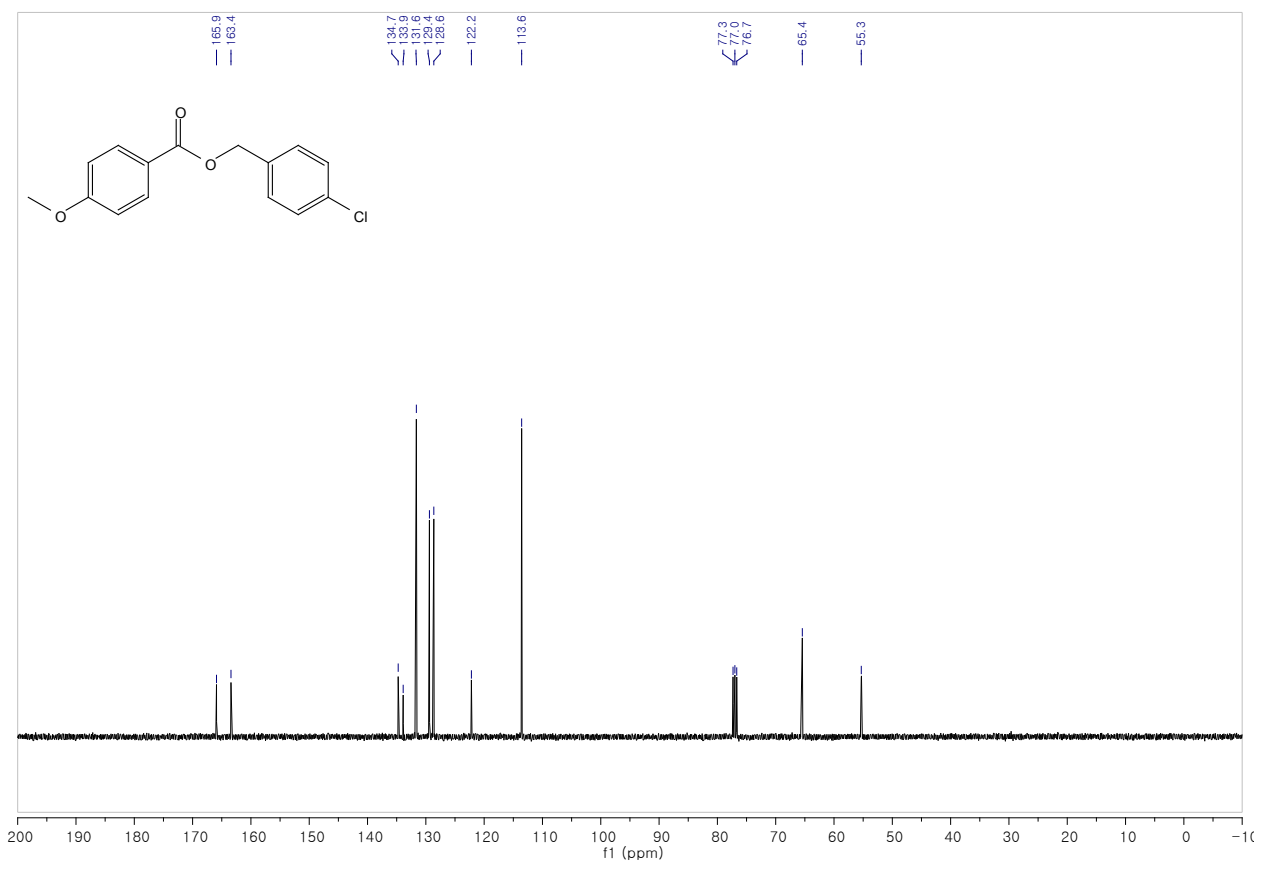

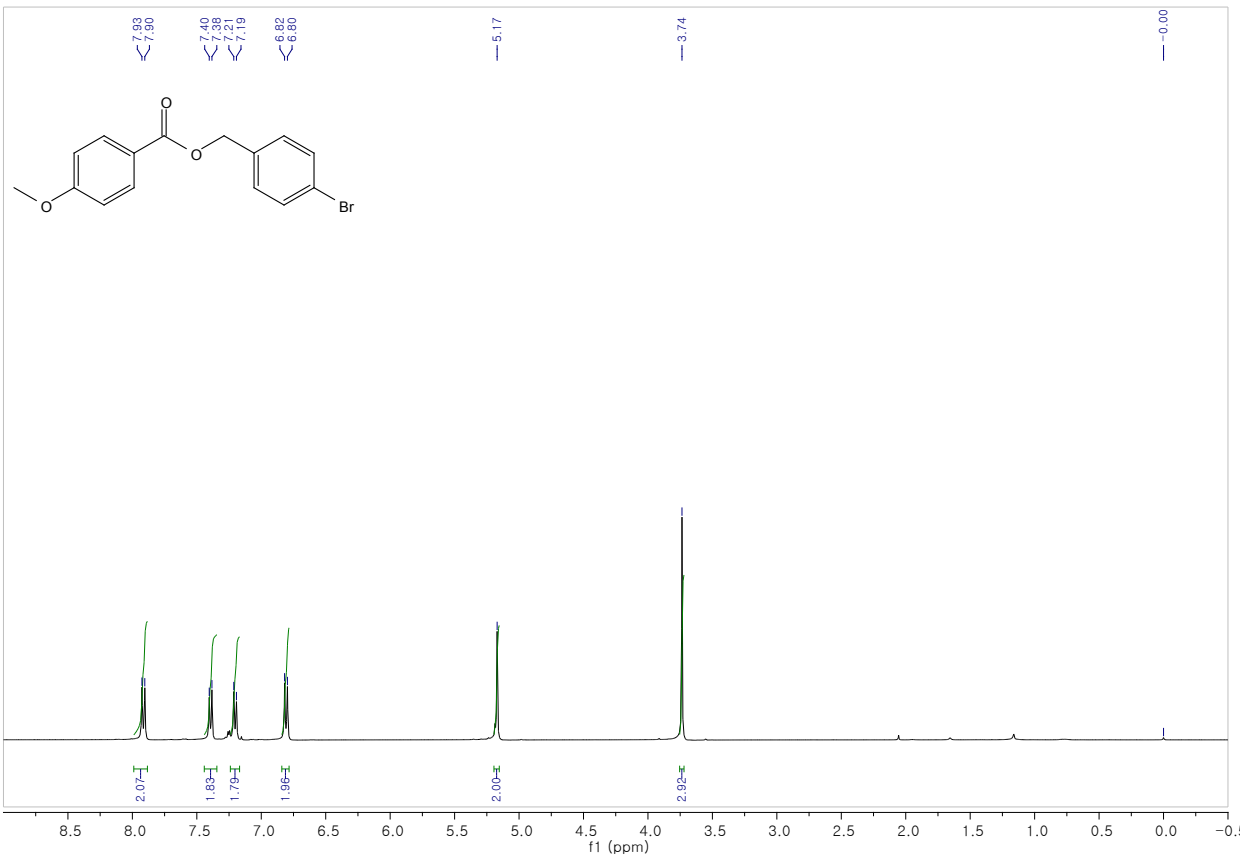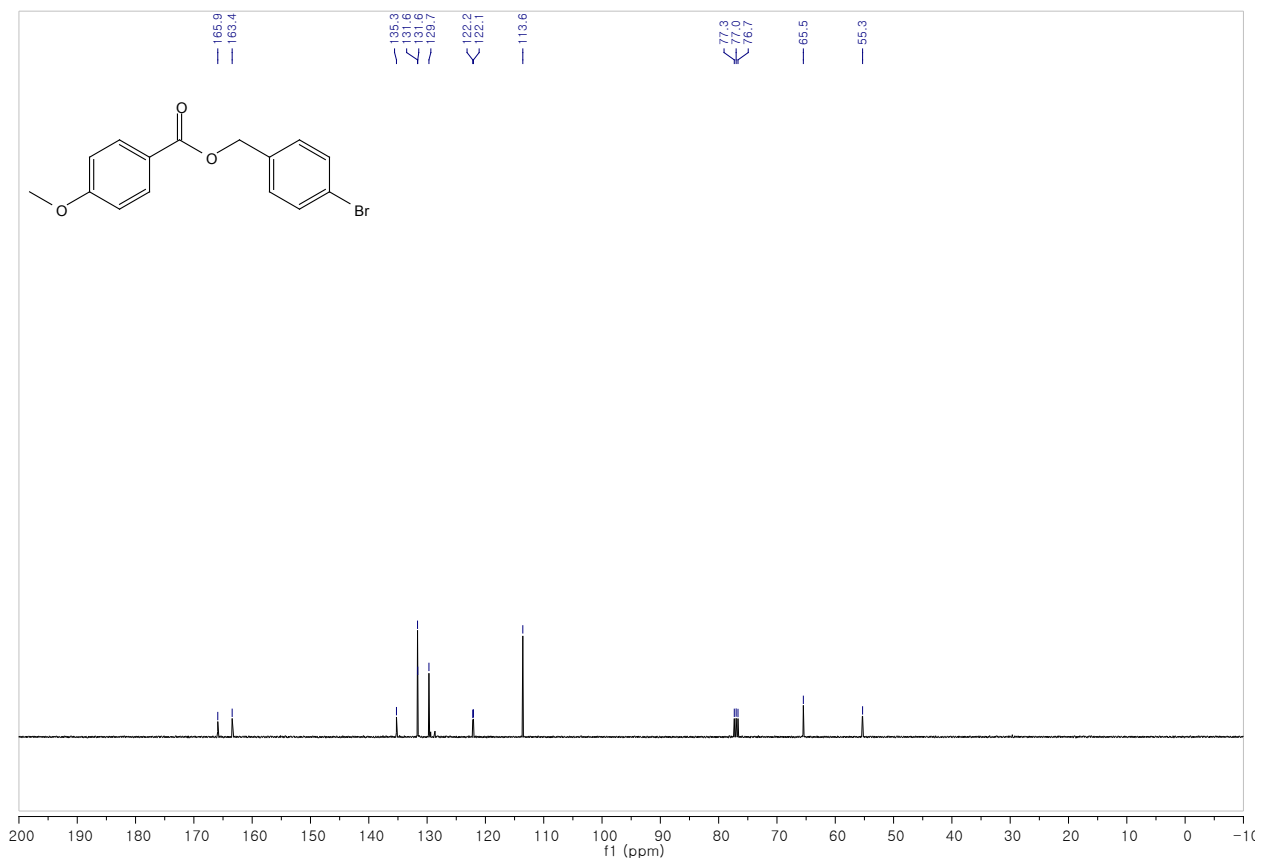

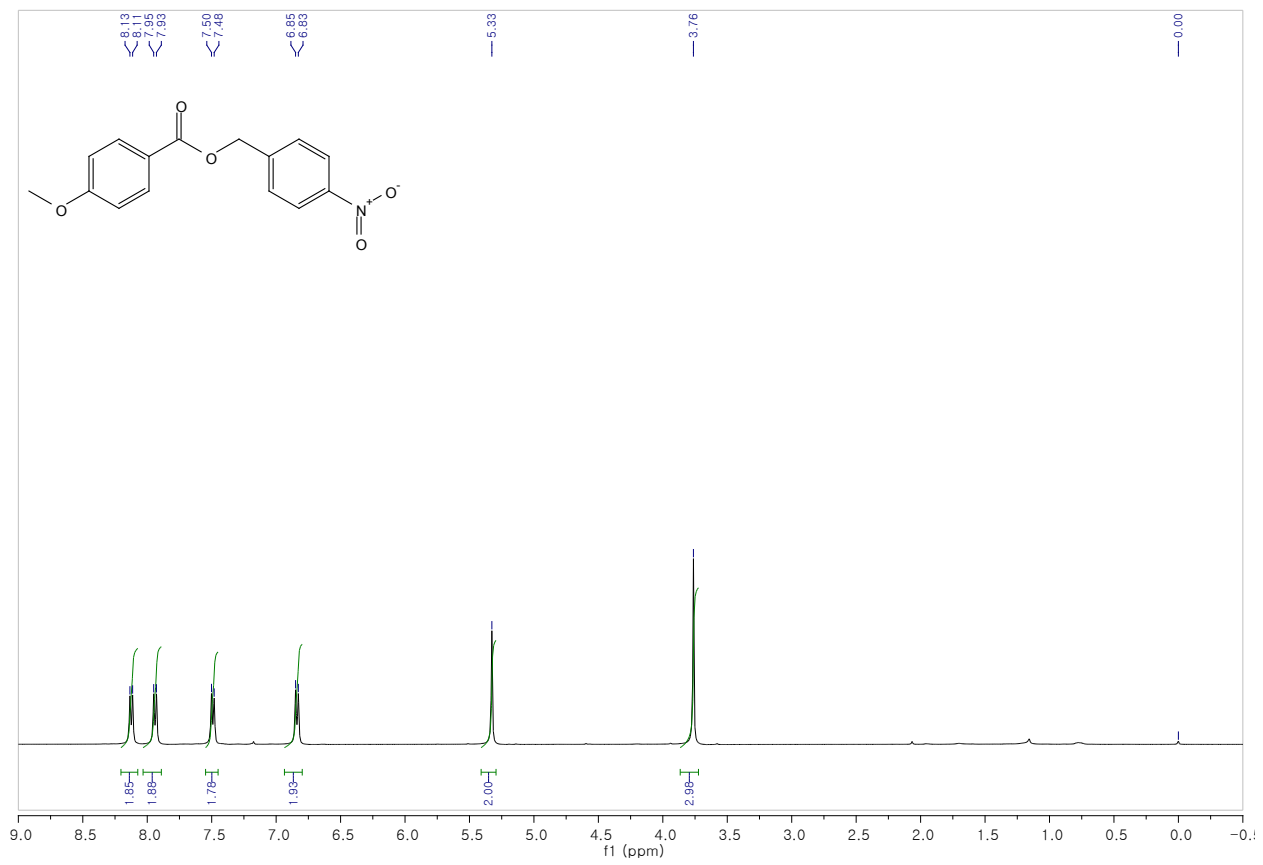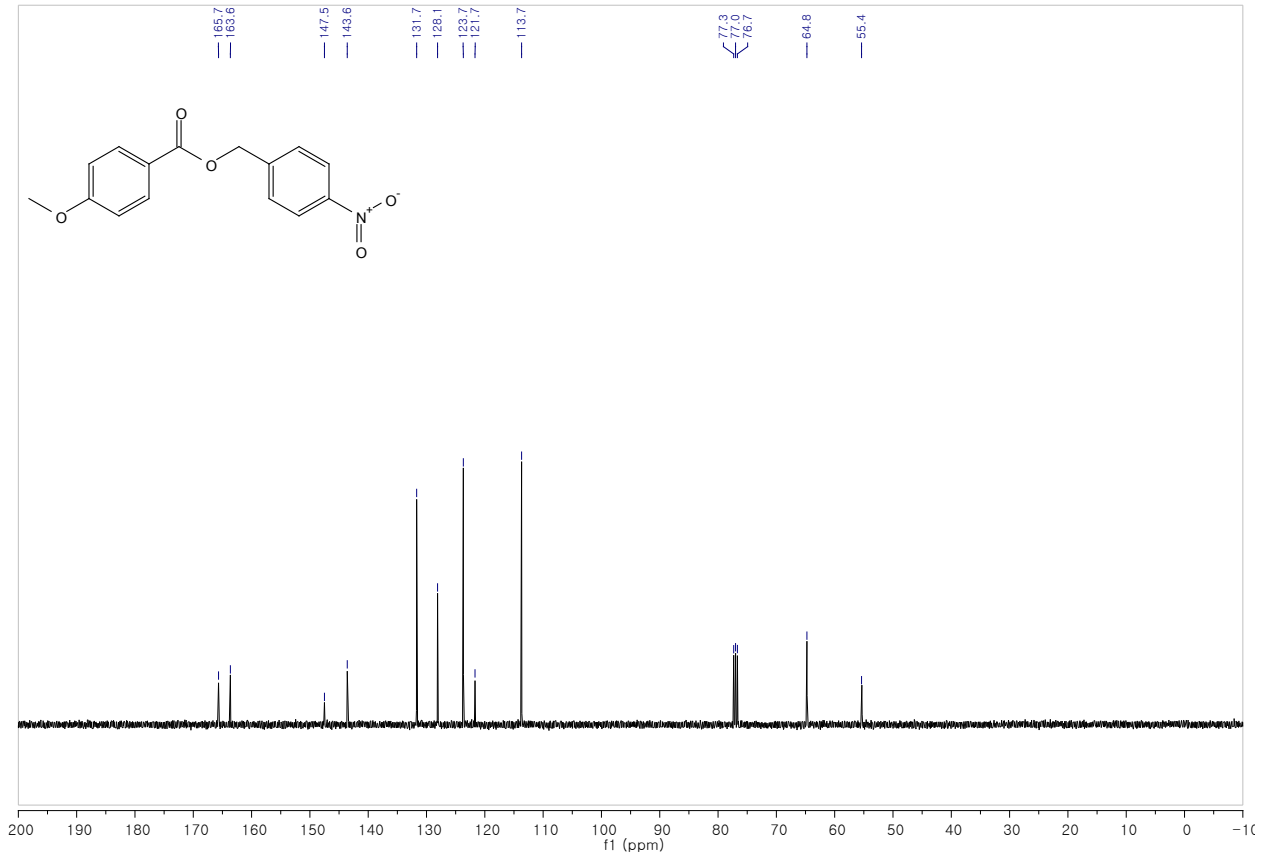

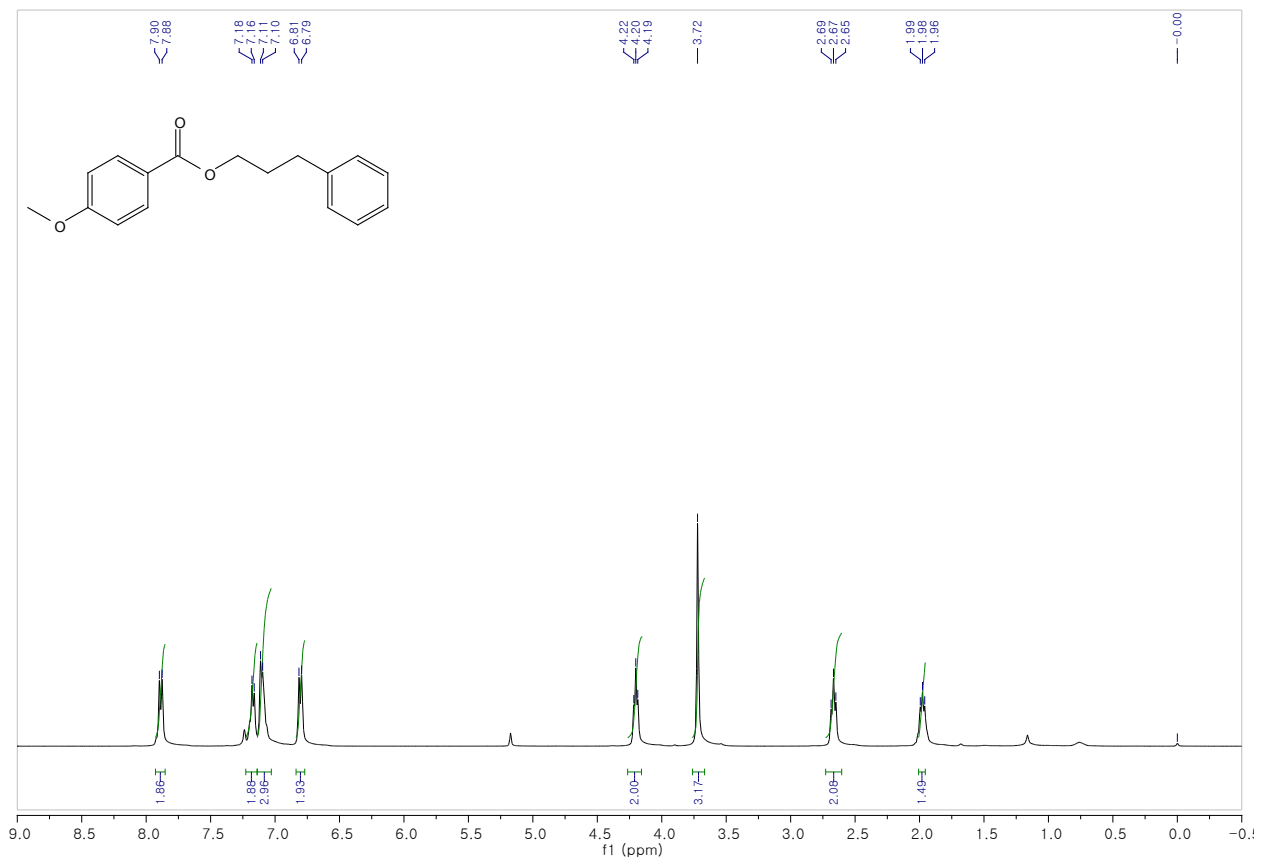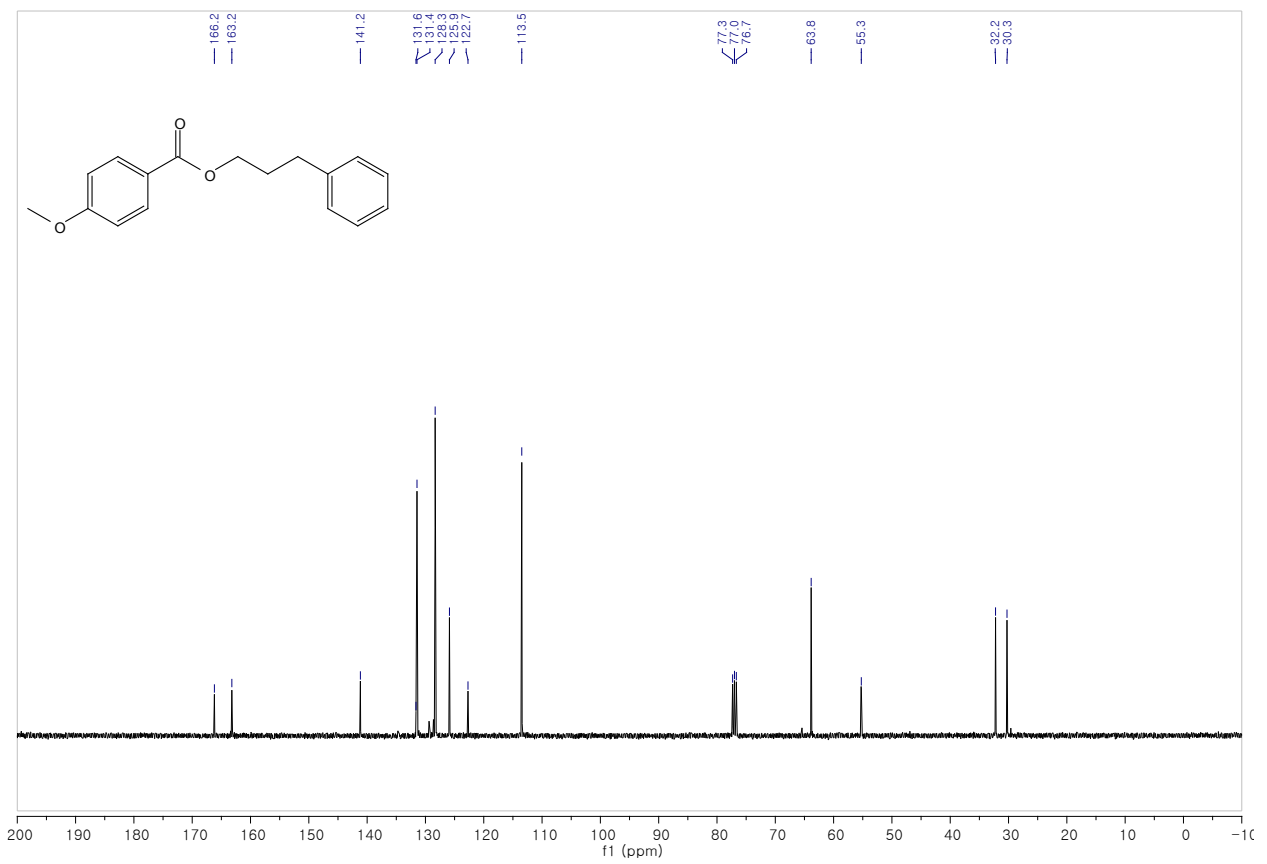

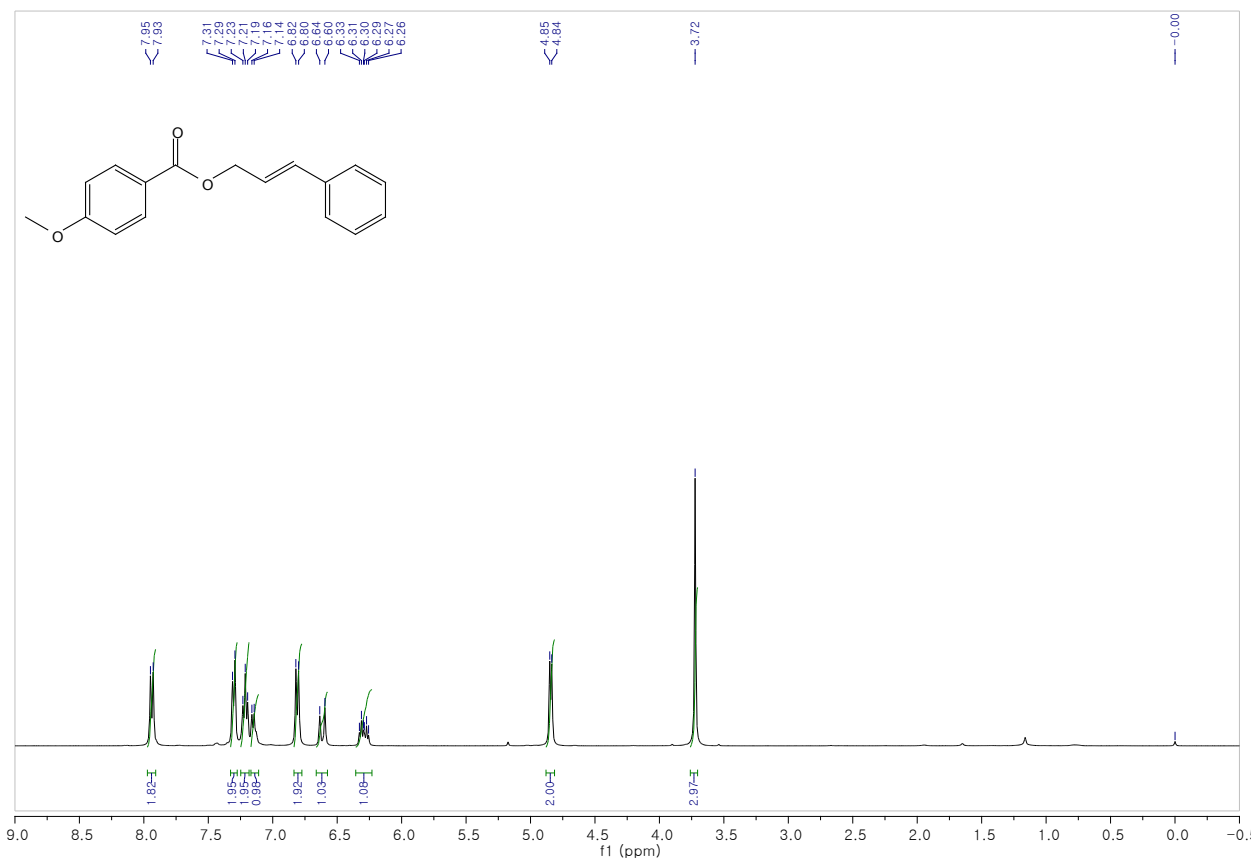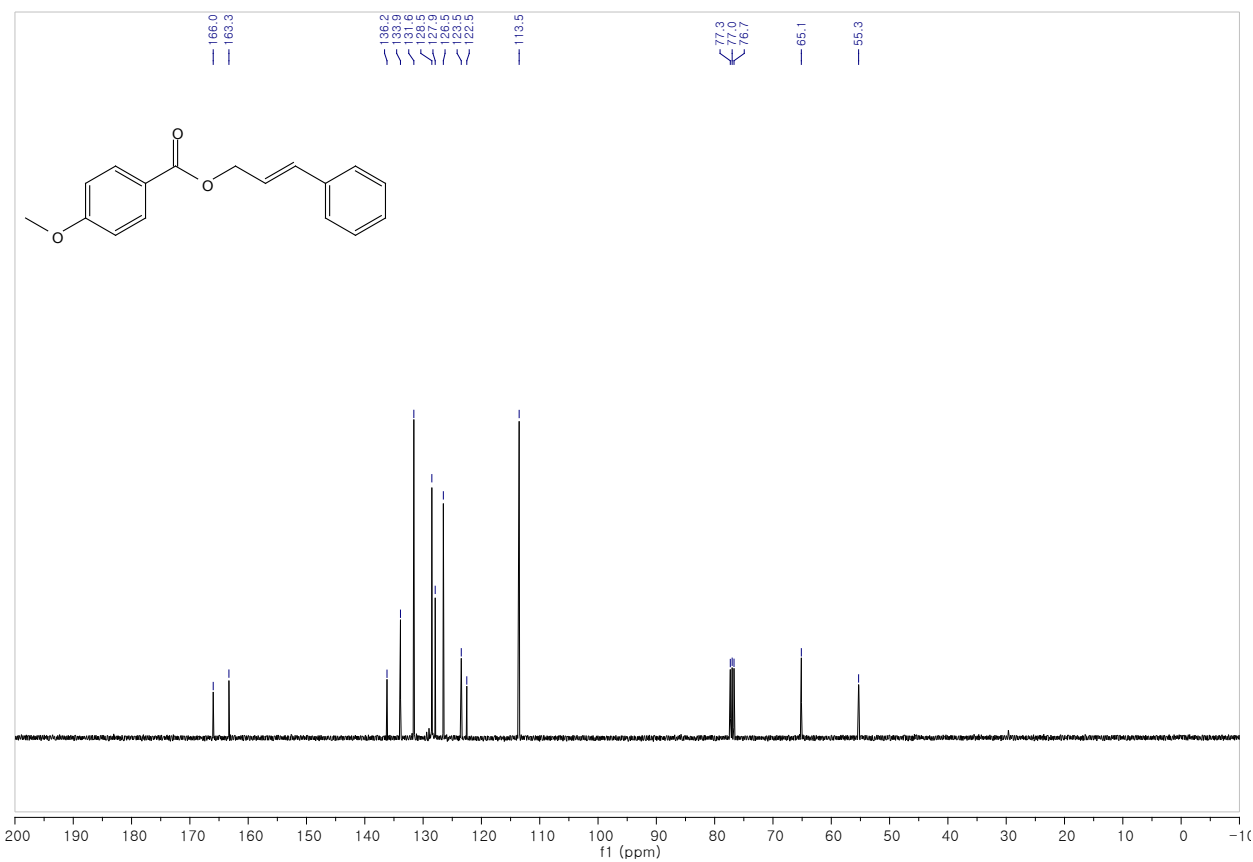

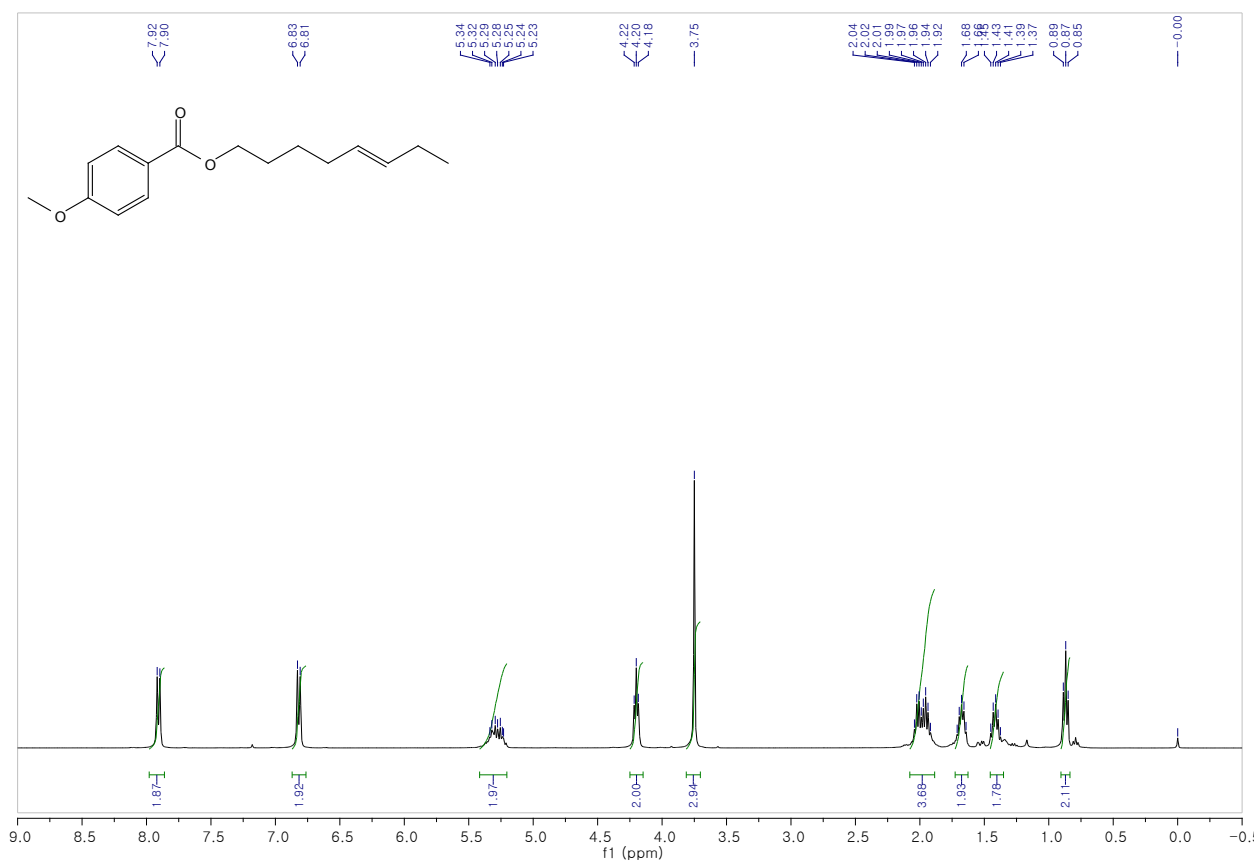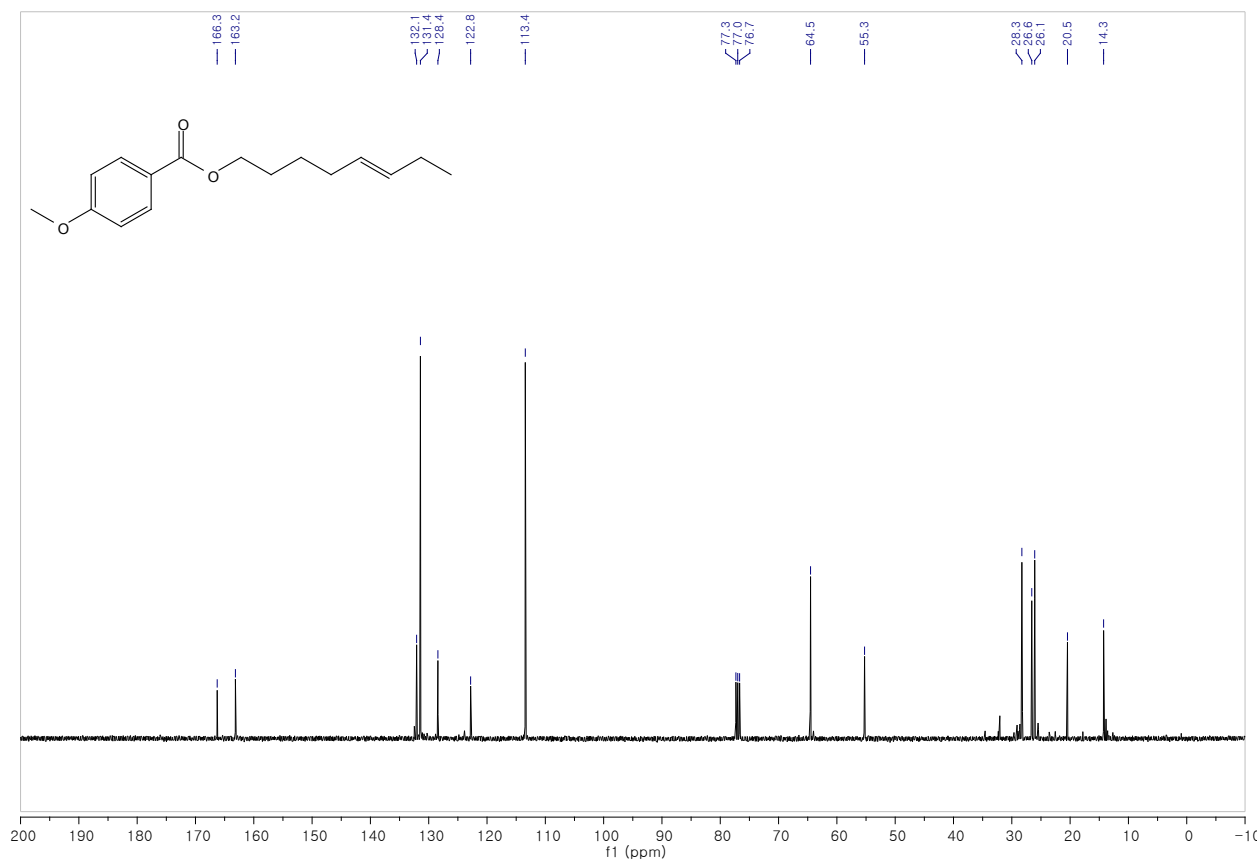



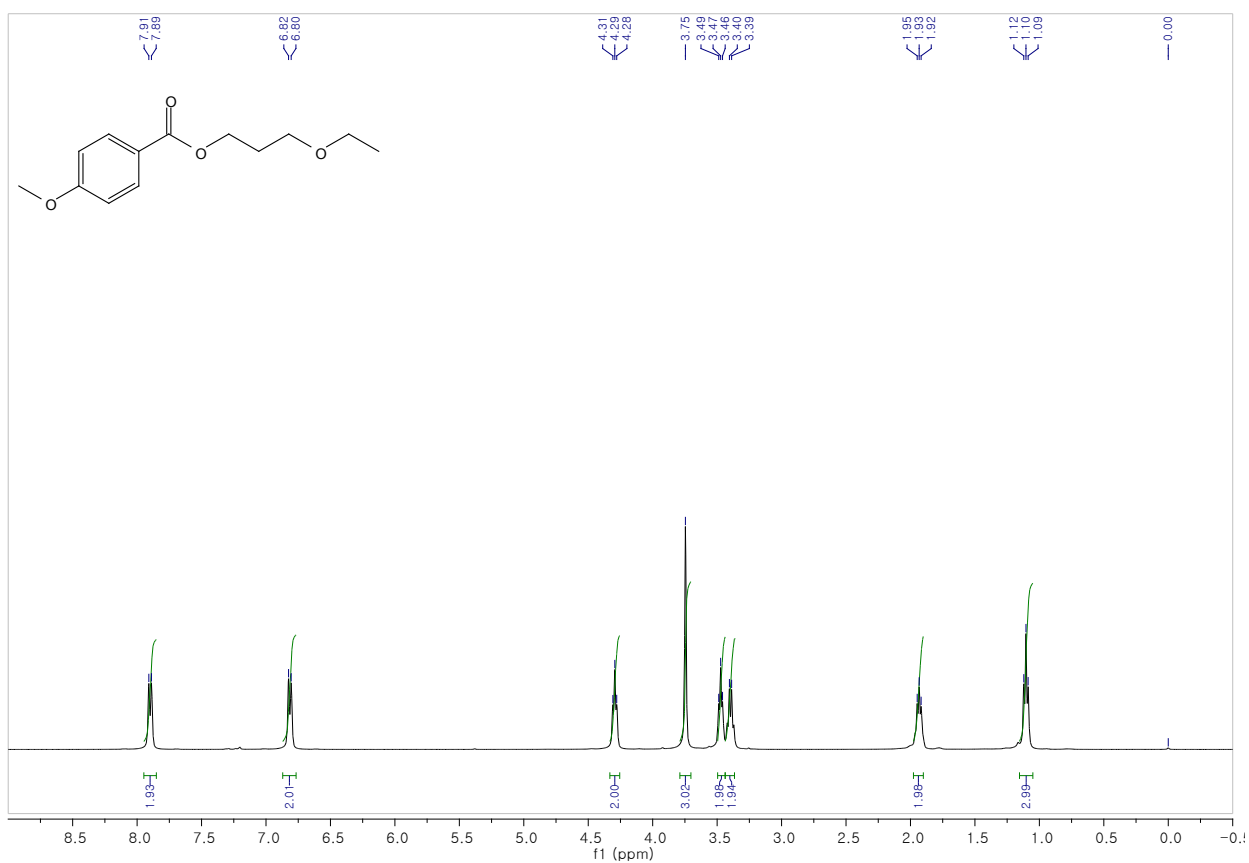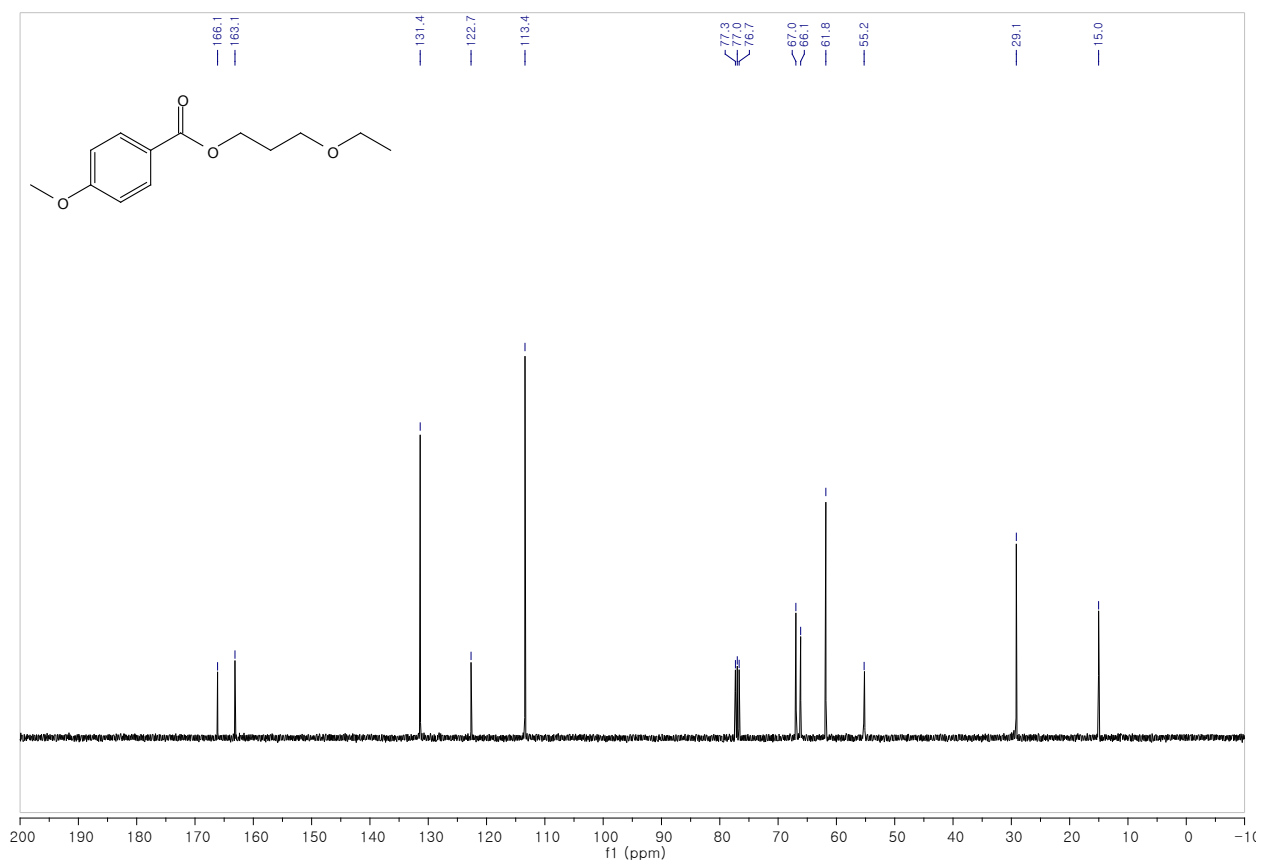

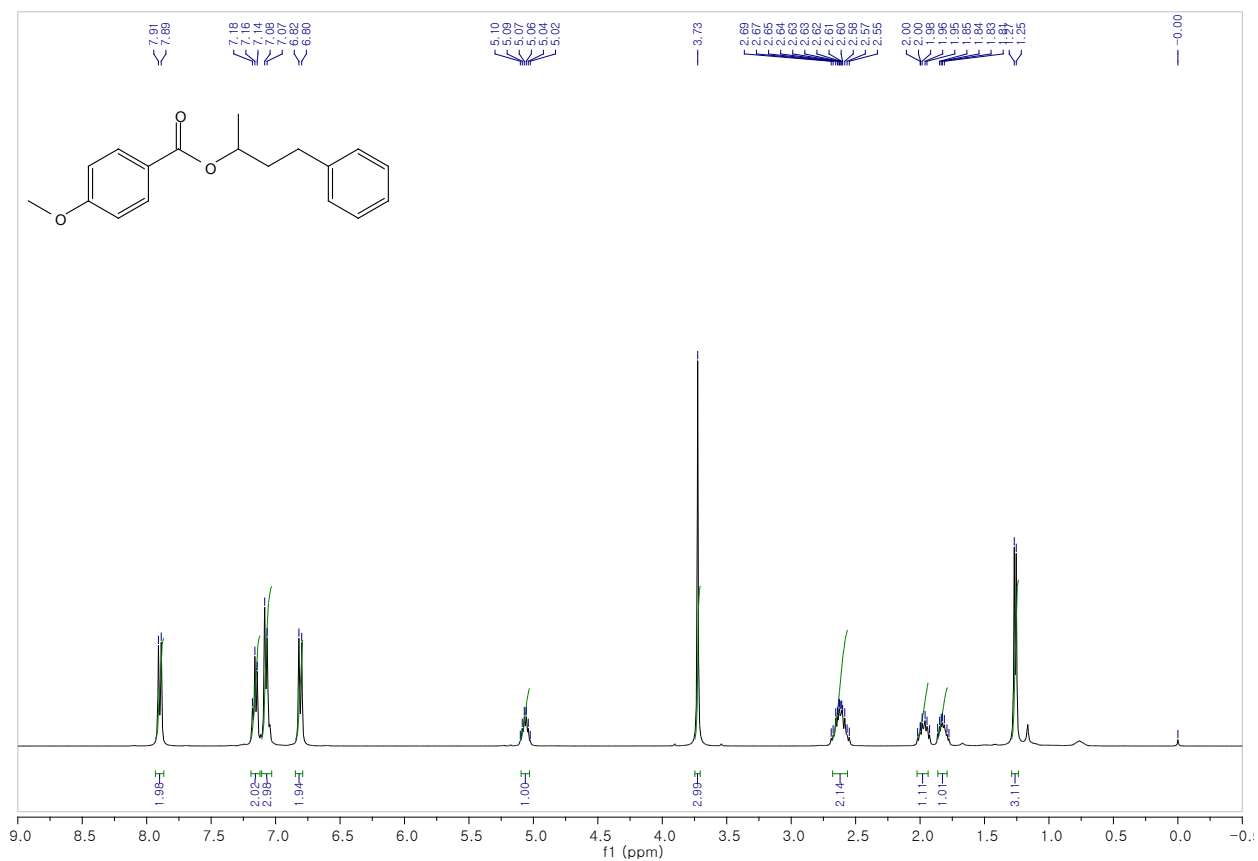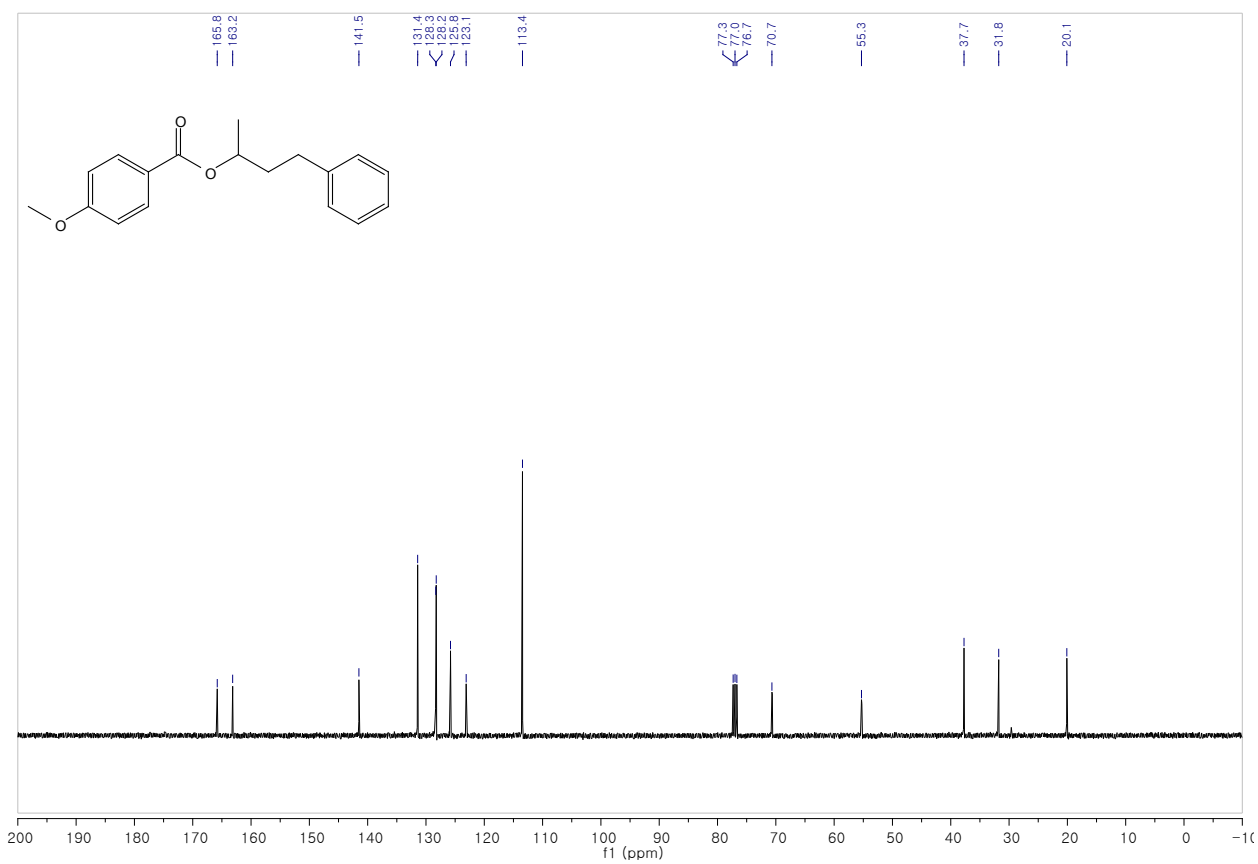

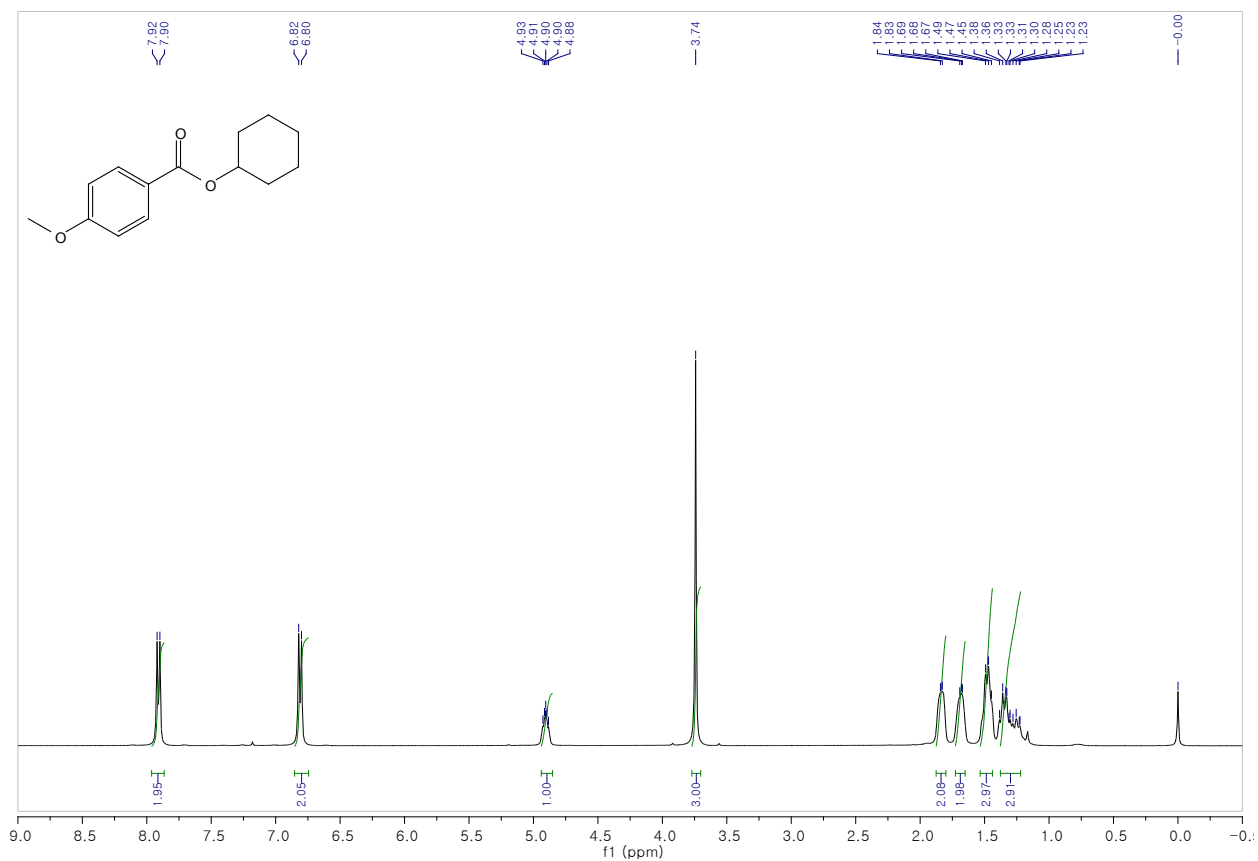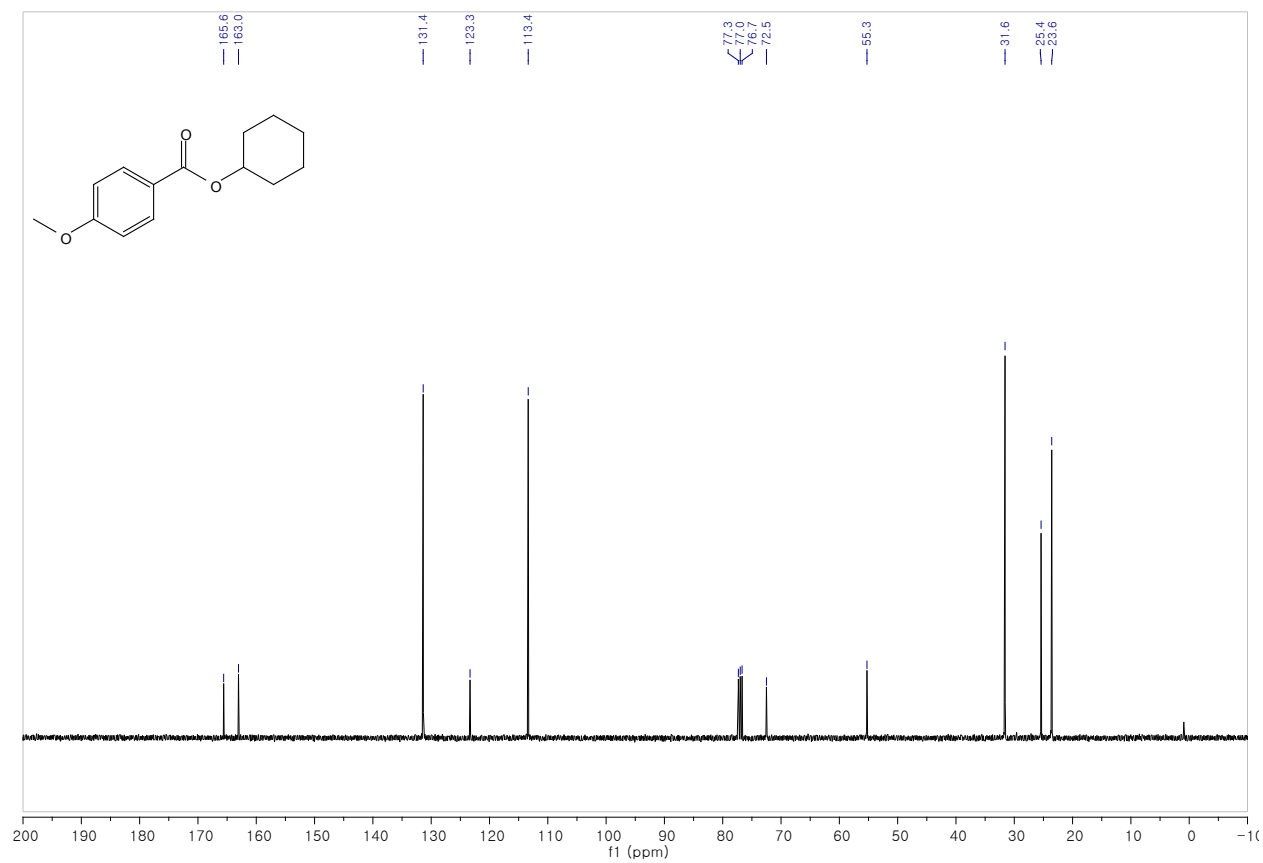

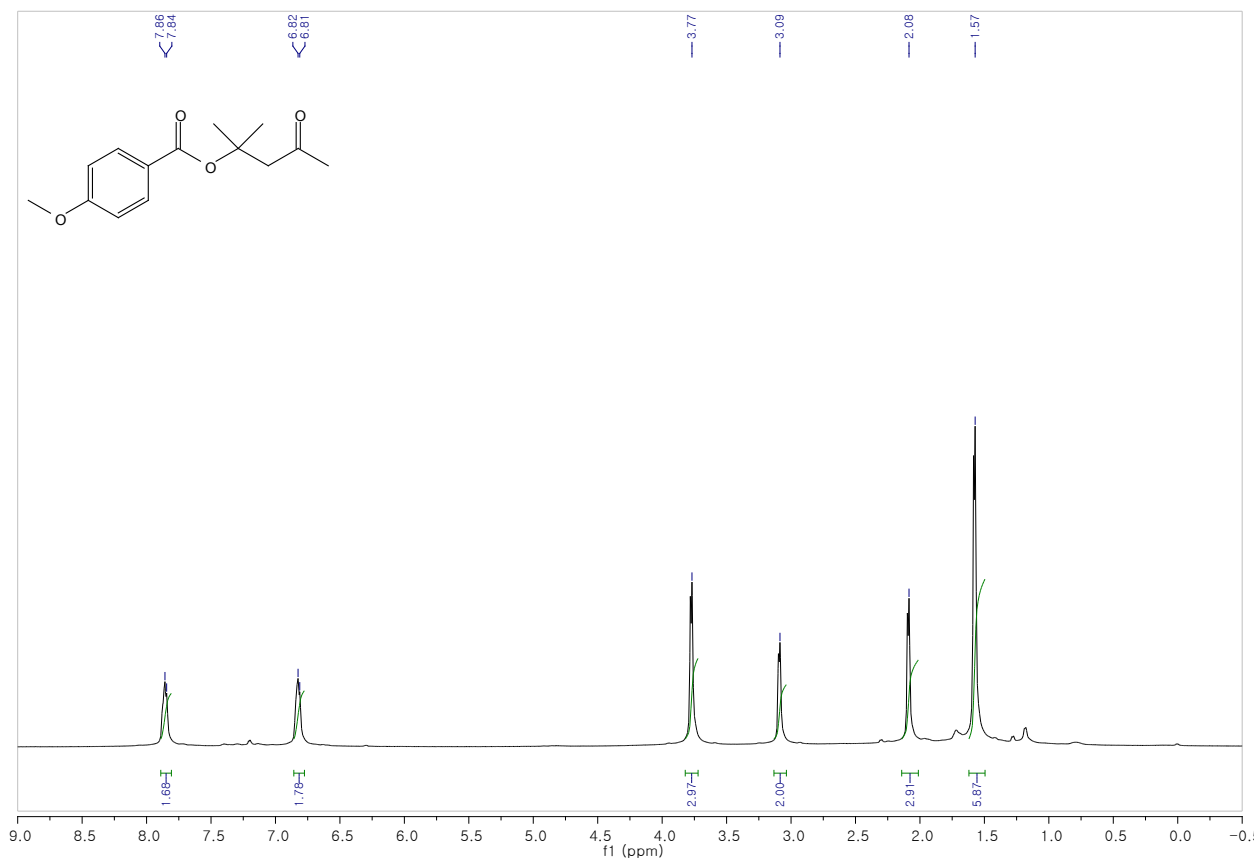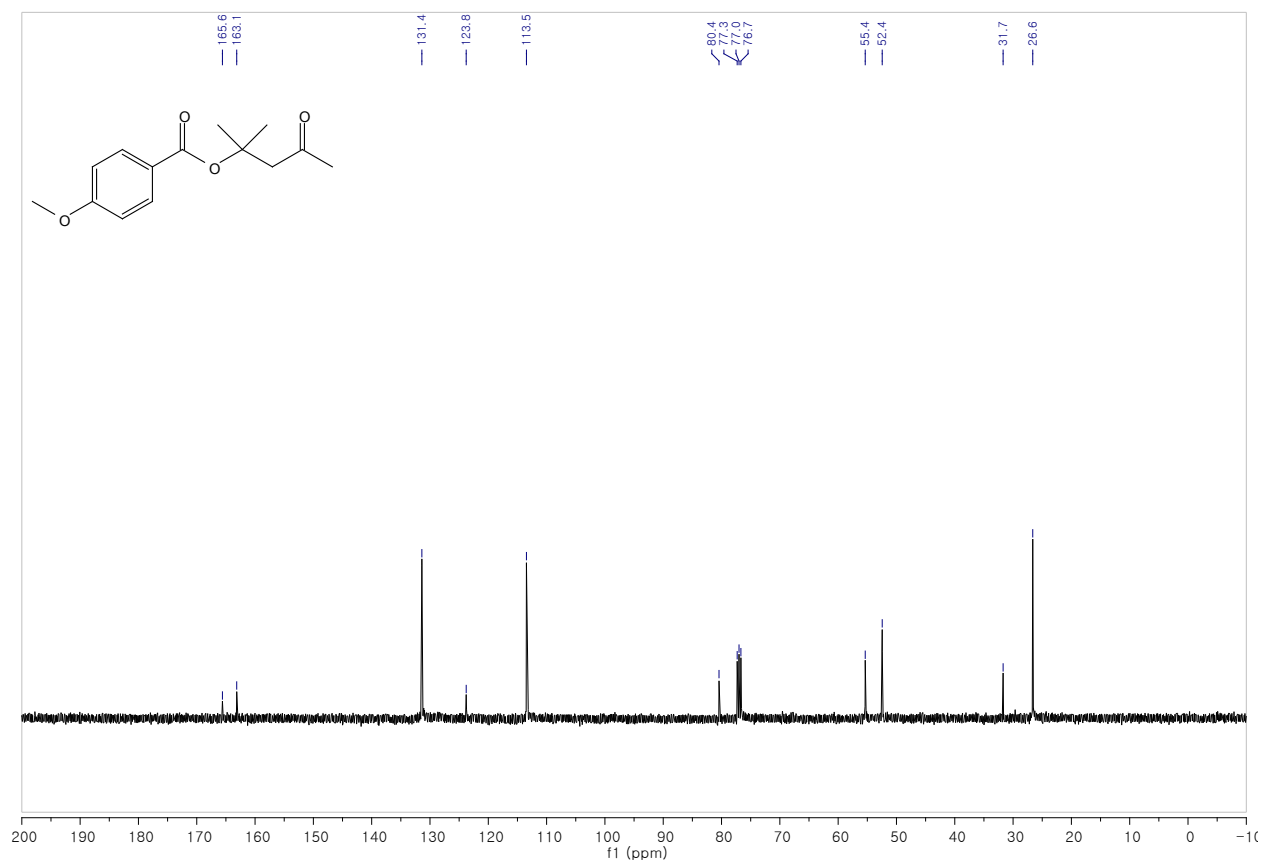

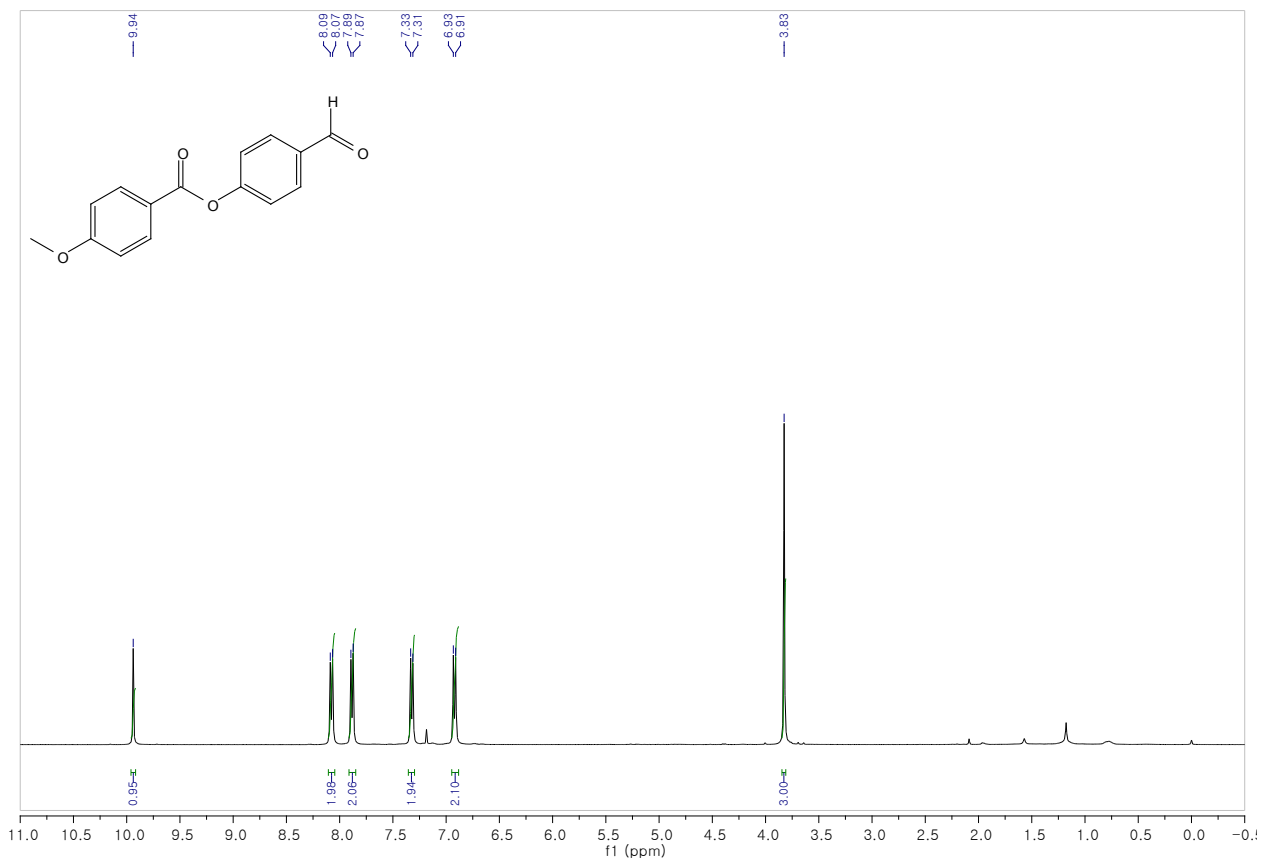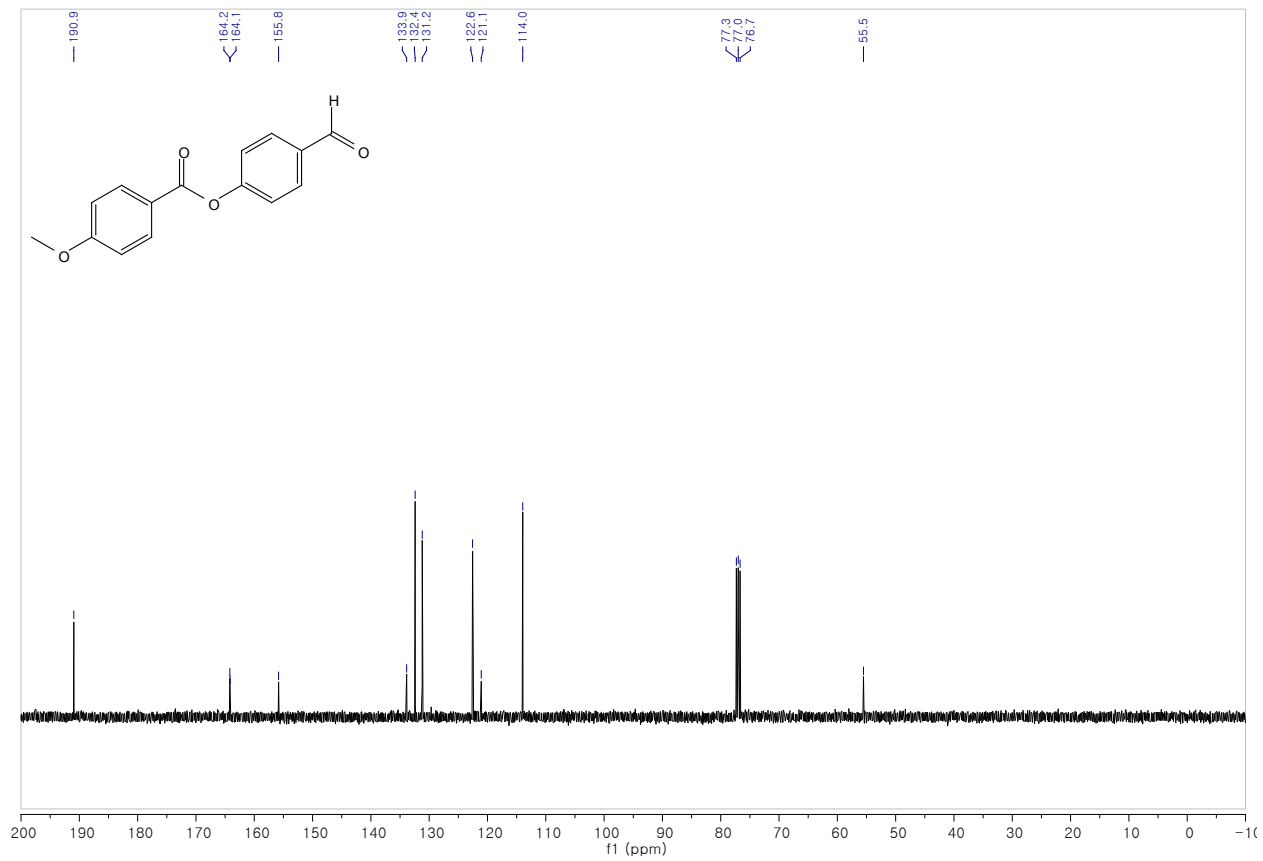

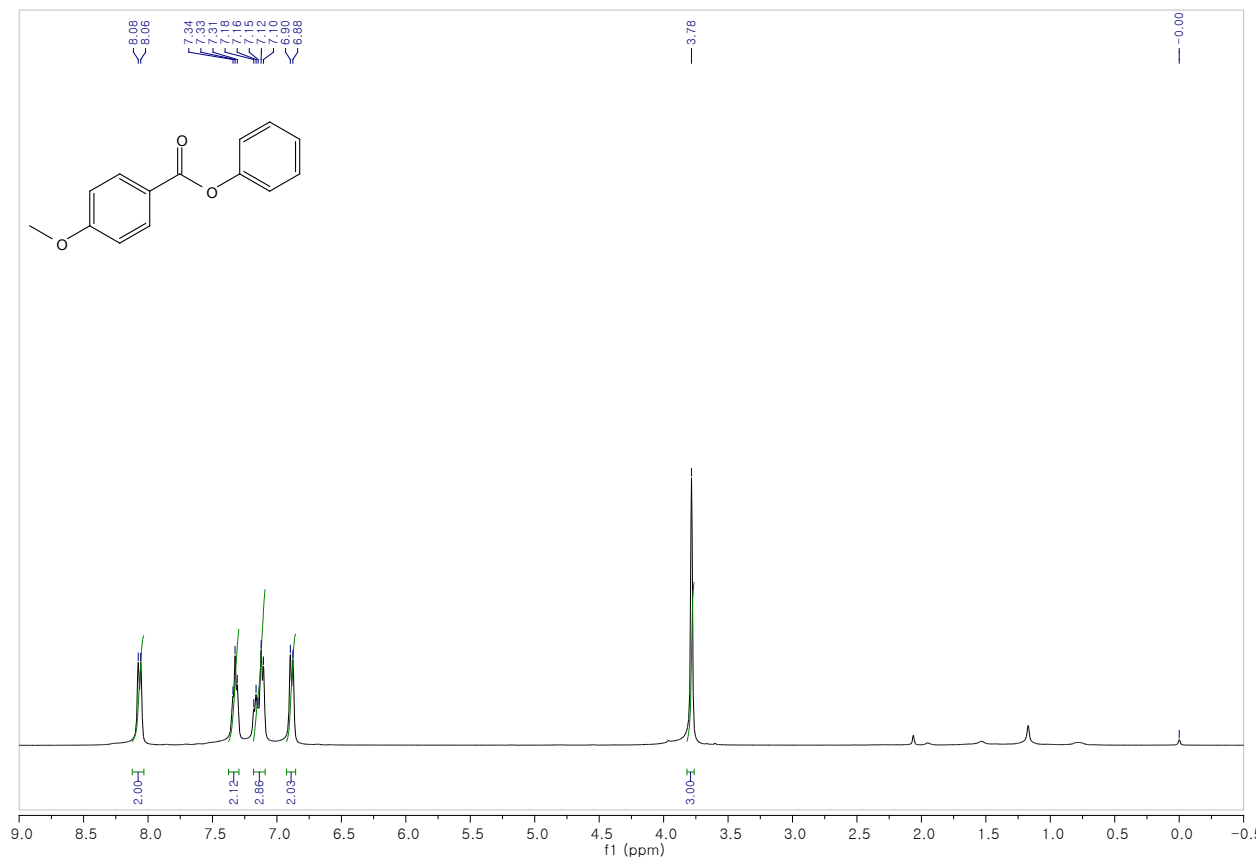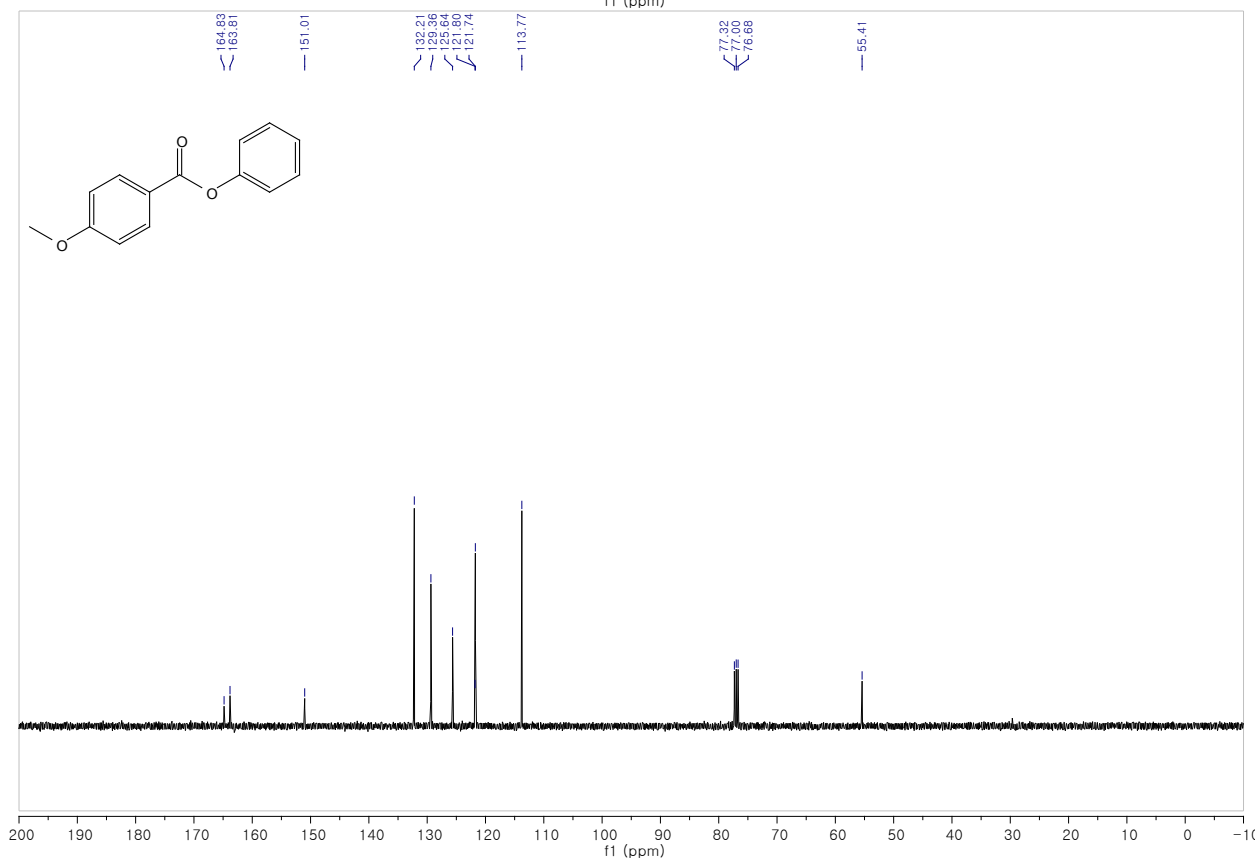

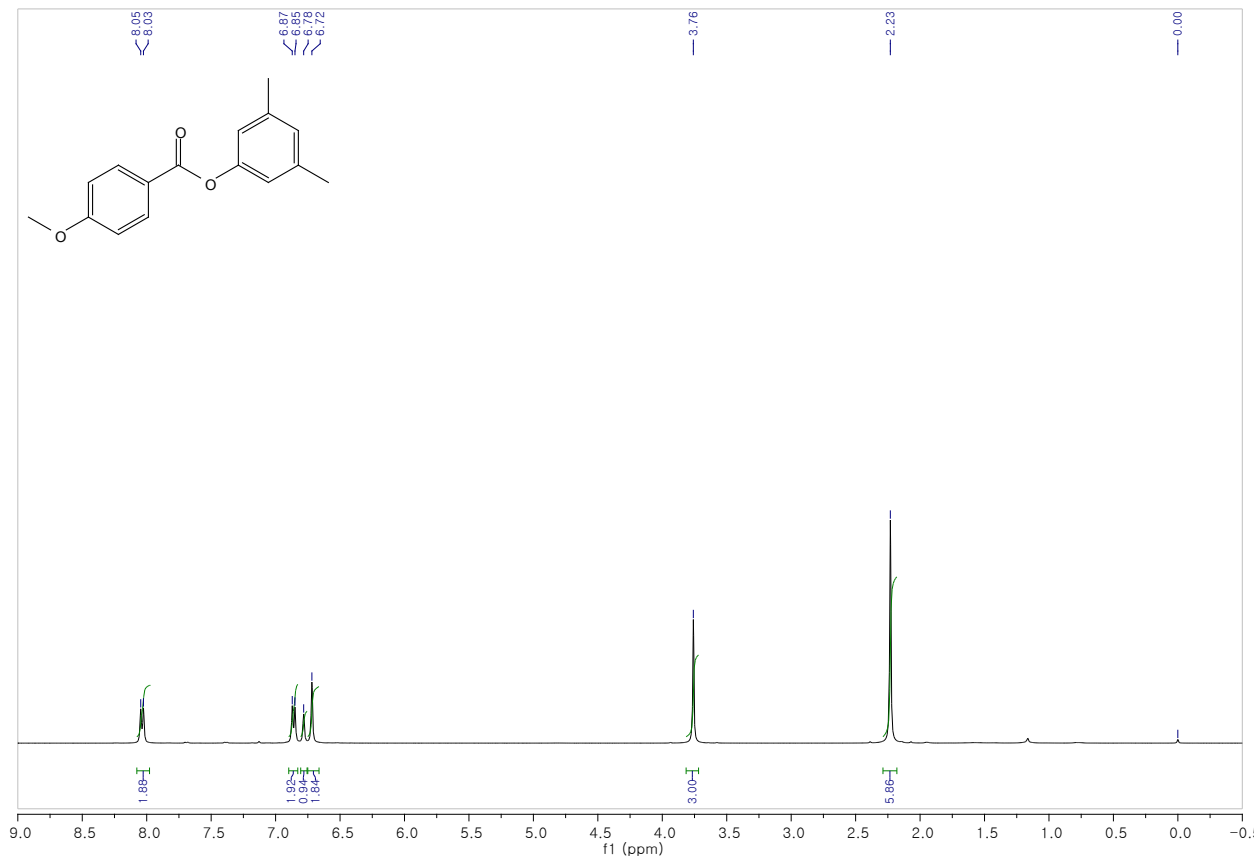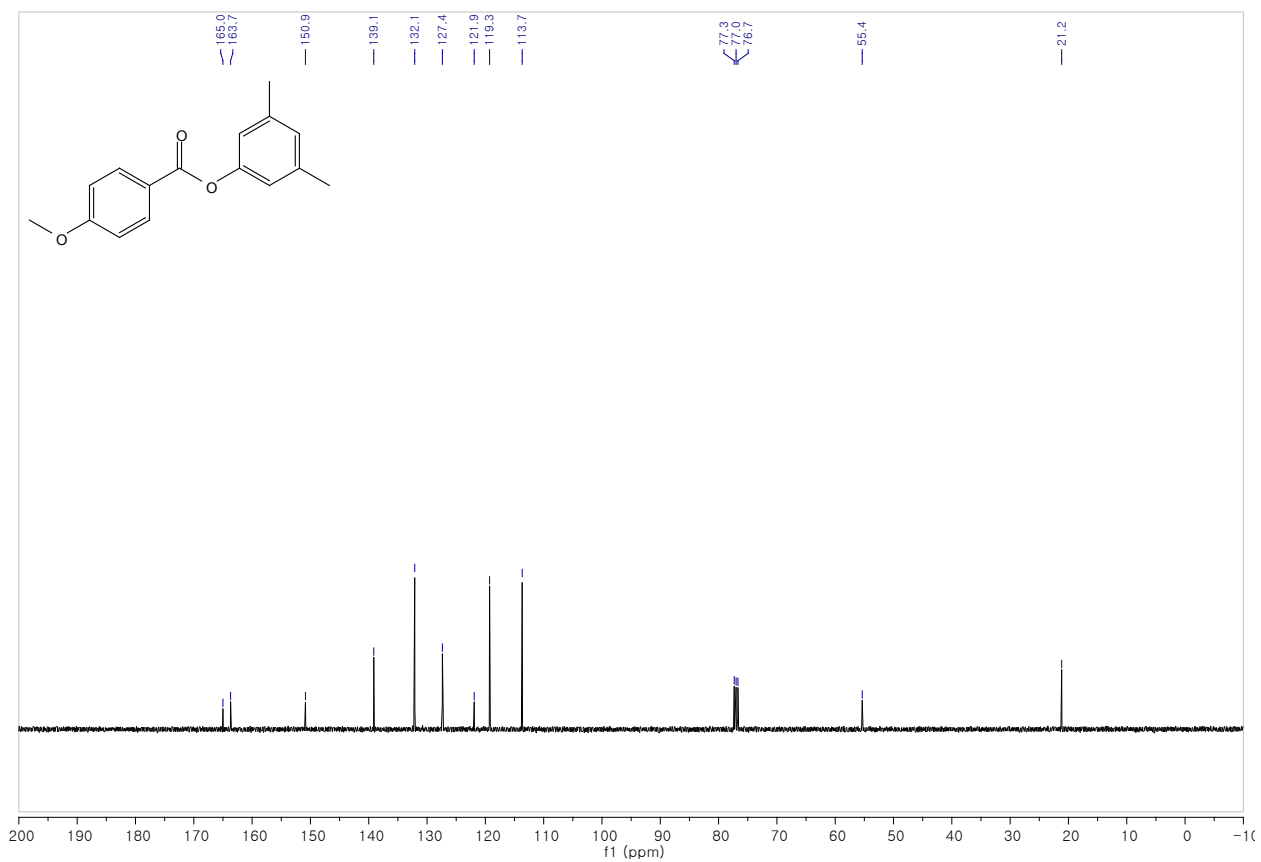

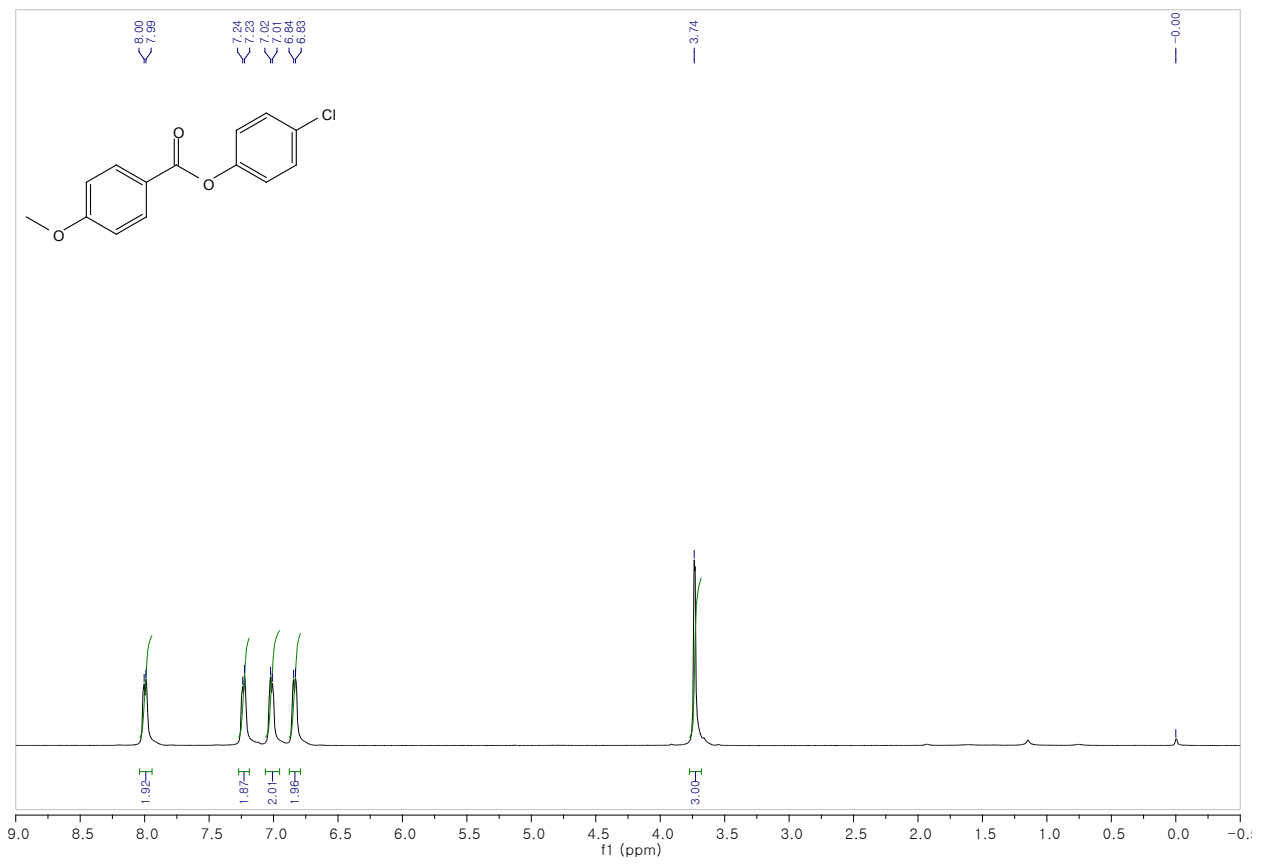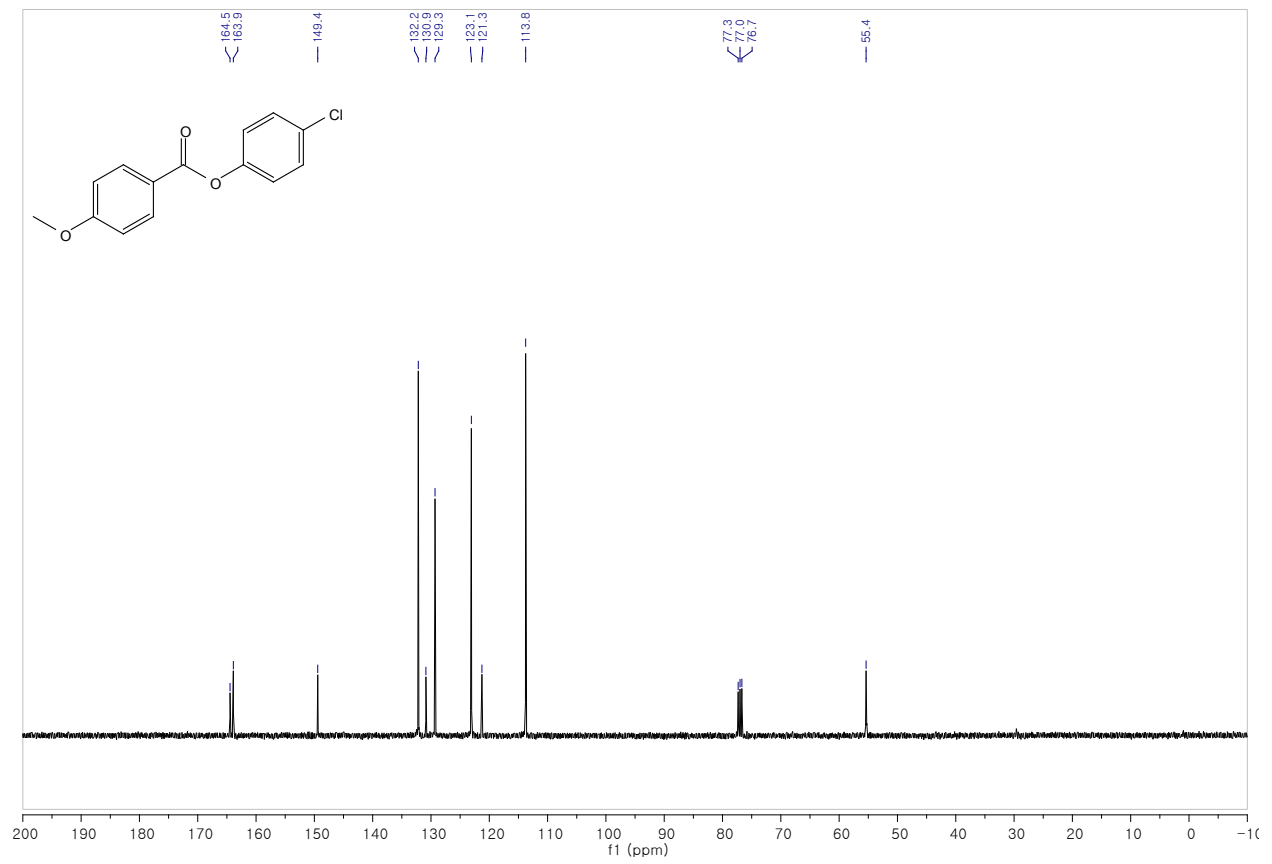



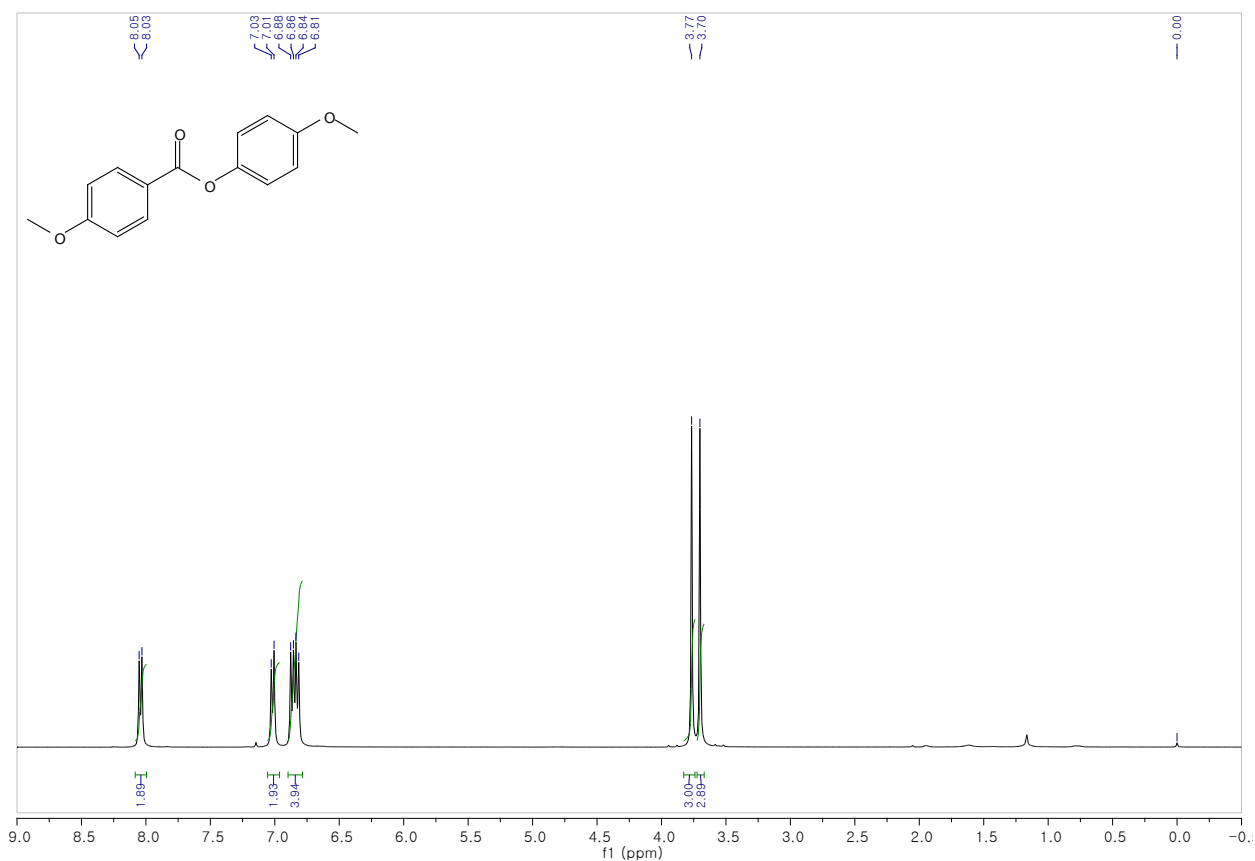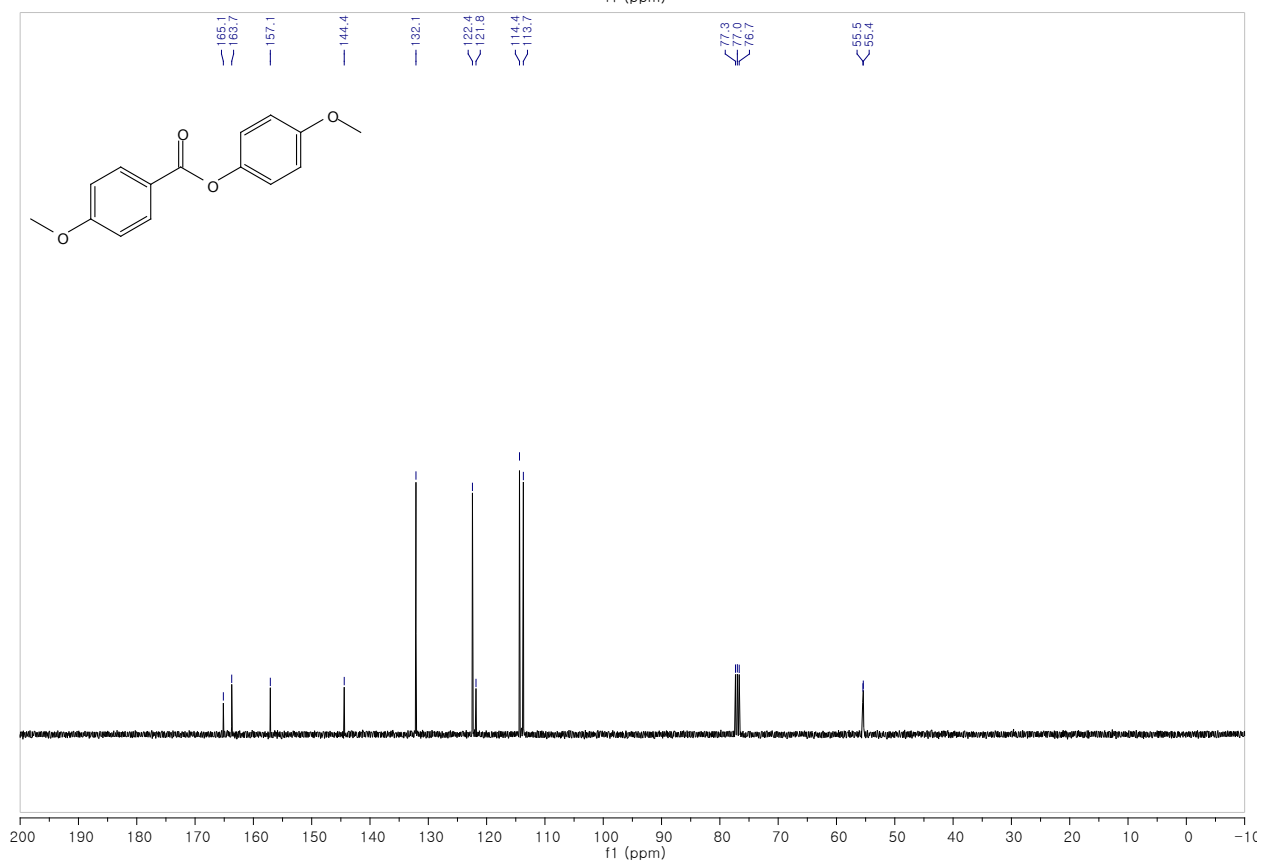

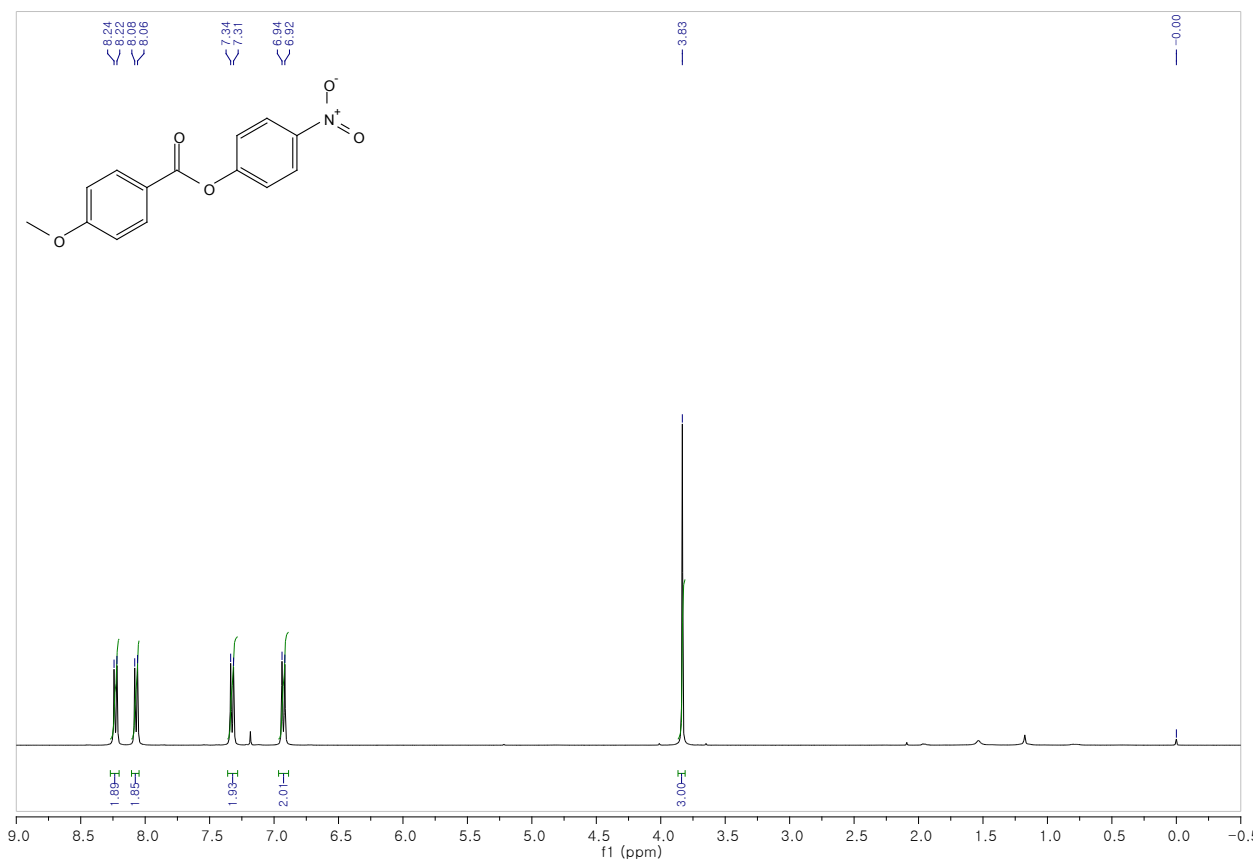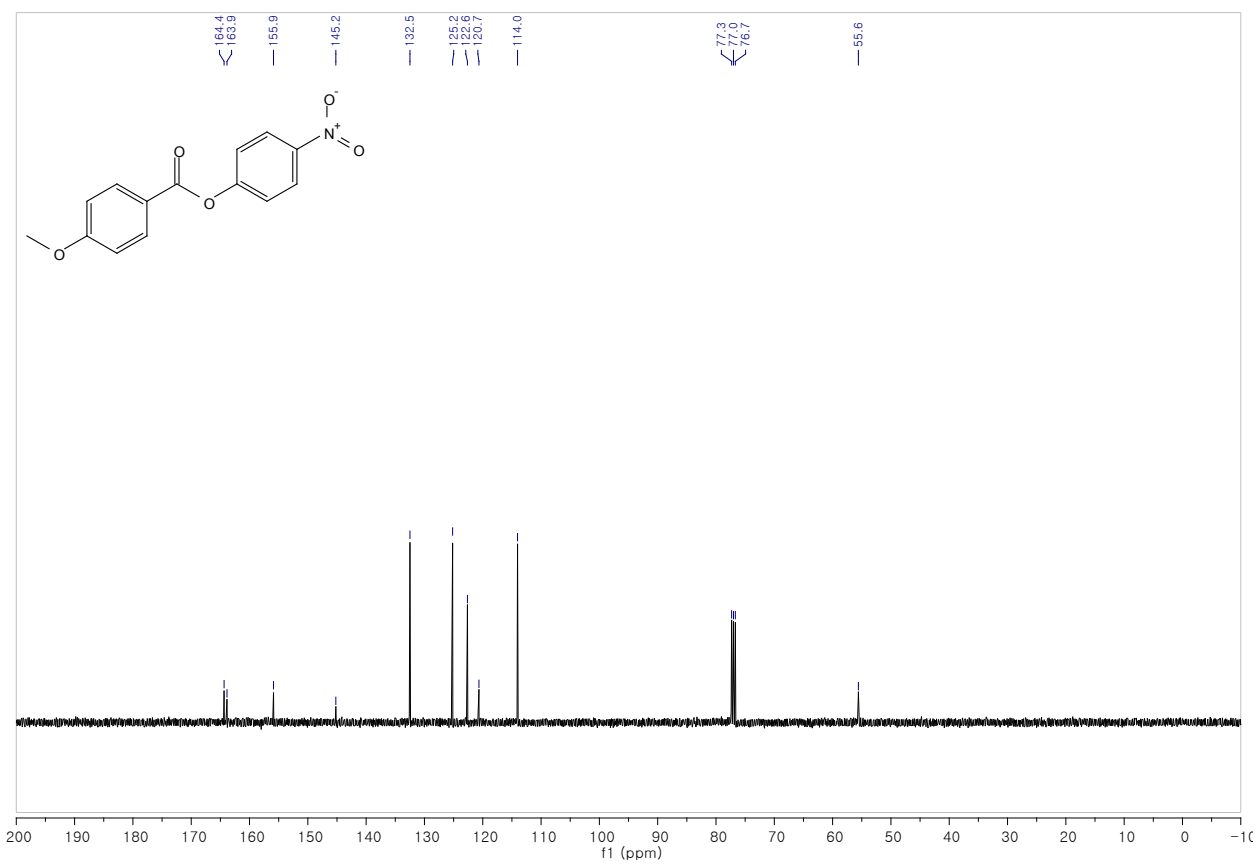

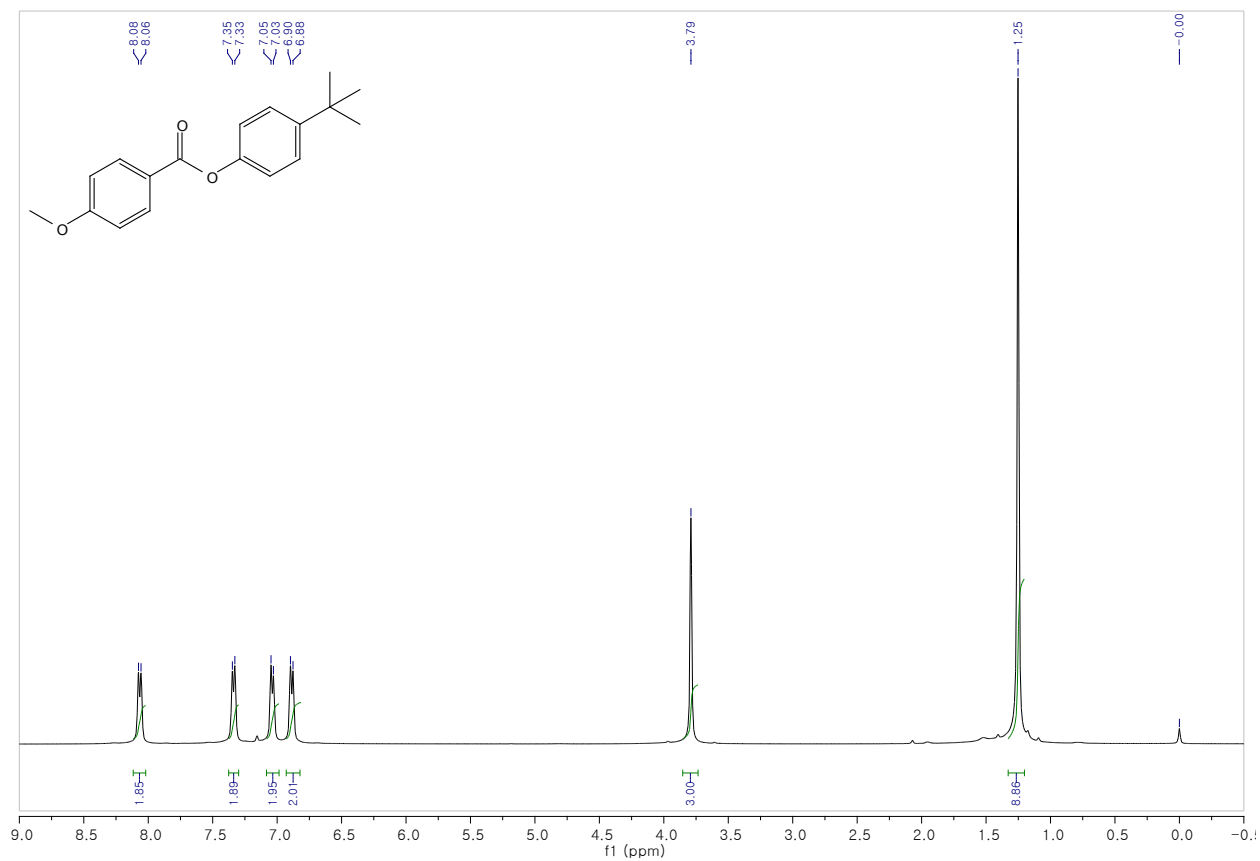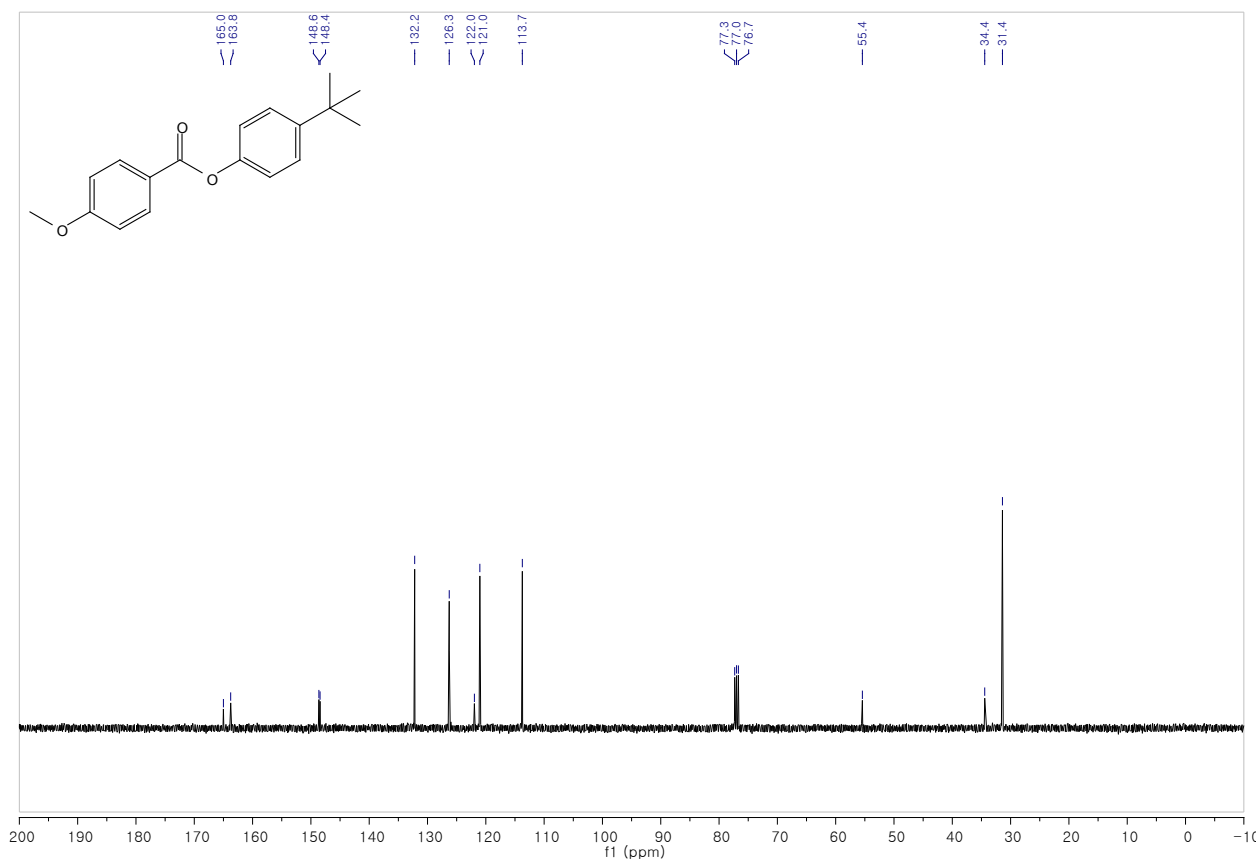

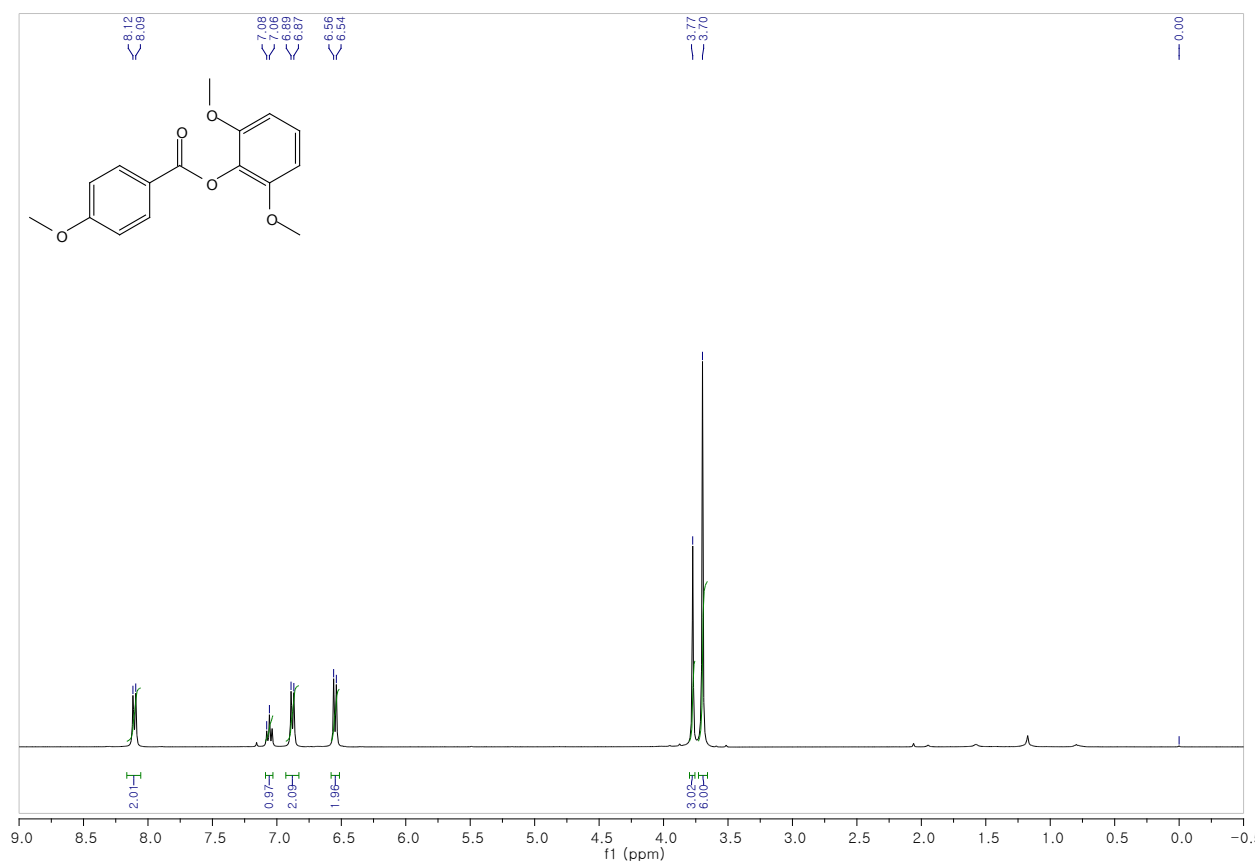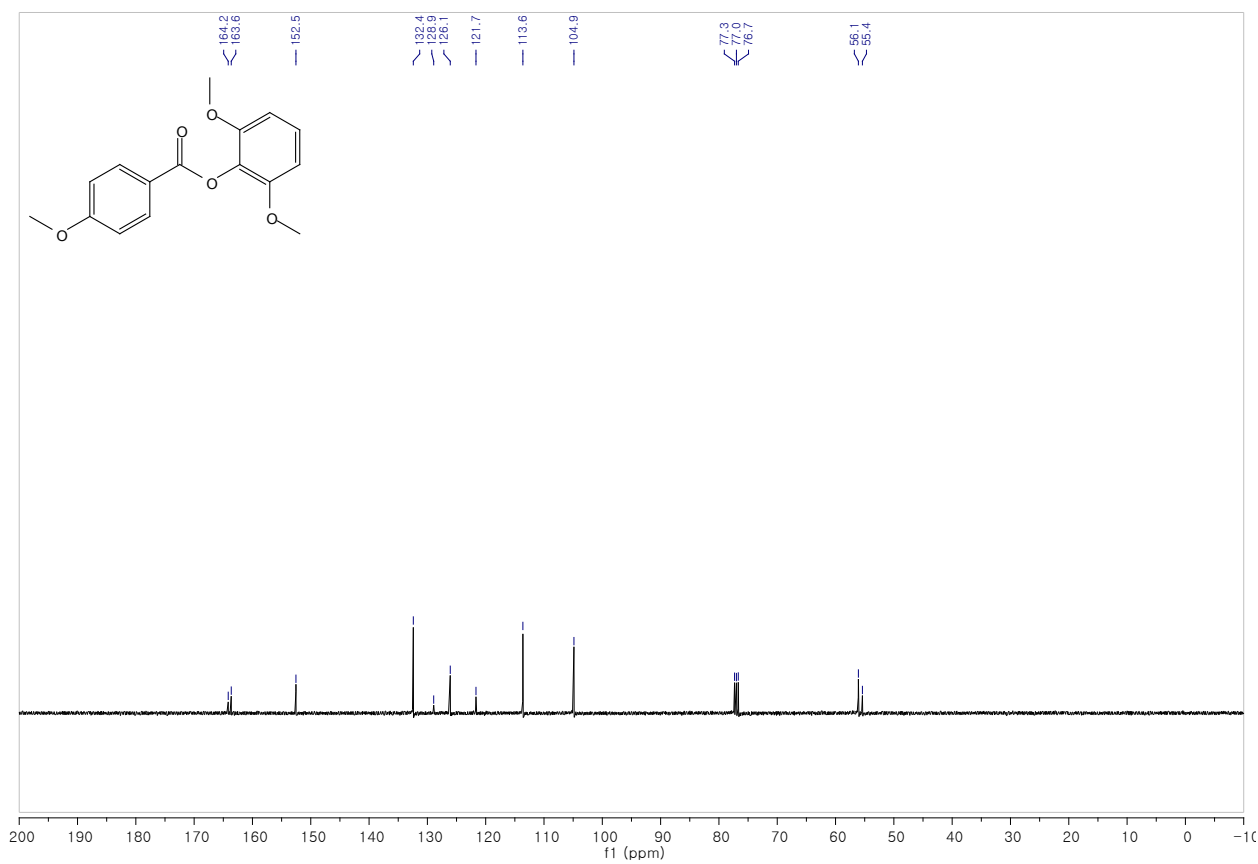

Supplement: c6ra25723b1.pdf [file c6ra25723b1.pdf]
